# Supplementary material for: Dynamic covalent self-assembly and self-sorting processes in the formation of imine-based macrocycles and macrobicyclic cages
Source: Royal Society of Chemistry journal article supplement (doi:10.1039/d3sc01174g), 2023-01-01
Supplement: d3sc01174g1.pdf [file d3sc01174g1.pdf]

## SUPPORTING INFORMATION

### Dynamic Covalent Self-Assembly and Self-Sorting Processes in the Formation of Imine-based Macrocycles and Macrobicyclic Cages

Zhaozheng Yang,<sup>a,b</sup> Ferran Esteve<sup>b</sup>, Cyril Antheaume<sup>b</sup> and Jean-Marie Lehn<sup>\*a,b</sup>

<sup>a</sup> Lehn Institute of Functional Materials (LIFM), Sun Yat-Sen University, 510006 Guangzhou, China.

<sup>b</sup> Laboratoire de Chimie Supramoléculaire, Institut de Science et d'Ingénierie Supramoléculaires (ISIS), Université de Strasbourg, 8 allée Gaspard Monge, 67000 Strasbourg, France. E-mail: [lehn@unistra.fr](mailto:lehn@unistra.fr)

#### Table of Contents

|                                                                                                    |    |
|----------------------------------------------------------------------------------------------------|----|
| <b>1. Instrumentation and Measurement</b> .....                                                    | 2  |
| <b>2. List of the selected dialdehydes, polyamines, macrocycles and macrobicyclic cages</b> .....  | 3  |
| <b>3. Experimental Method</b> .....                                                                | 3  |
| 3.1 Experimental methods for time-dependent <sup>1</sup> H NMR monitoring studies .....            | 3  |
| 3.2 Experimental methods for time-dependent HRMS monitoring studies.....                           | 5  |
| 3.3 NOTE .....                                                                                     | 5  |
| <b>4. Synthesis and Characterization</b> .....                                                     | 5  |
| 4.1 Synthesis of [1,1':4',1''-Terphenyl]-4,4''-dicarboxaldehyde (TriPh).....                       | 5  |
| 4.2 Synthesis of macrocycle TriPh <sub>2</sub> (NON) <sub>2</sub> .....                            | 6  |
| 4.3. Synthesis of Macrobicyclic Cage TriPh <sub>3</sub> T <sub>2</sub> .....                       | 7  |
| <b>5. Formation of isolated macrocycles</b> .....                                                  | 9  |
| 5.1 Formation of macrocycle pPh <sub>2</sub> (NON) <sub>2</sub> .....                              | 9  |
| 5.2 Formation of macrocycle BiPh <sub>2</sub> (NON) <sub>2</sub> .....                             | 11 |
| 5.3 Formation of macrocycle Py <sub>2</sub> (NON) <sub>2</sub> .....                               | 13 |
| 5.4 Time-dependent HRMS of macrocycle pPh <sub>2</sub> (NON) <sub>2</sub> .....                    | 14 |
| 5.5 Time-dependent HRMS of macrocycle BiPh <sub>2</sub> (NON) <sub>2</sub> .....                   | 15 |
| <b>6. Formation of isolated macrobicyclic cages</b> .....                                          | 17 |
| 6.1 Time-dependent <sup>1</sup> H NMR of macrobicyclic cage pPh <sub>3</sub> T <sub>2</sub> .....  | 17 |
| 6.2 Time-dependent <sup>1</sup> H NMR of macrobicyclic cage BiPh <sub>3</sub> T <sub>2</sub> ..... | 20 |
| 6.3 Time-dependent <sup>1</sup> H NMR of macrobicyclic cage Py <sub>3</sub> T <sub>2</sub> .....   | 24 |
| 6.4 Competitive experiment of 3Py + 3NON + 2T .....                                                | 25 |
| 6.5 Time-dependent HRMS of macrobicyclic cage pPh <sub>3</sub> T <sub>2</sub> .....                | 26 |
| 6.6 Time-dependent HRMS of macrobicyclic cage BiPh <sub>3</sub> T <sub>2</sub> .....               | 28 |
| <b>7. Self-sorting experiments</b> .....                                                           | 30 |
| 7.1 Self-sorting experiment 2pPh + 2BiPh + 4NON.....                                               | 30 |
| 7.2 Self-sorting experiment 3pPh + 3BiPh + 4T .....                                                | 35 |
| 7.3 Stepwise self-sorting experiment with BiPh, T and pPh.....                                     | 41 |
| 7.4 DFT calculations.....                                                                          | 42 |
| 7.5 Self-sorting experiment 2pPh + 2BiPh + 2TriPh + 6NON.....                                      | 45 |
| 7.6 Self-sorting experiment 3pPh + 3BiPh + 3TriPh + 6T .....                                       | 46 |
| 7.7 Self-sorting experiment 3Py + 3BiPh + 3TriPh + 2T + 6NON.....                                  | 47 |
| 7.8 Self-sorting experiment 3Py + 3pPh + 3BiPh + 3TriPh + 2T + 9NON .....                          | 48 |
| <b>8. X-ray crystallography</b> .....                                                              | 49 |
| <b>9. References</b> .....                                                                         | 53 |
| <b>10. Cartesian coordinates and energies</b> .....                                                | 55 |

## 1. Instrumentation and Measurement

NMR spectra were recorded on Bruker Avance 400 (400 MHz for  $^1\text{H}$  and 100 MHz for  $^{13}\text{C}$ ), Bruker Avance III plus 400 (400 MHz for  $^1\text{H}$ ) and Bruker Ascend Spectroscopy Avance Neo-500 MHz (500 MHz for  $^1\text{H}$  and 125 MHz for  $^{13}\text{C}$ ). MestReNova 10 software was used for the treatment of the NMR spectra. Chemical shifts are given in ppm. Residual solvent peaks were taken as reference ( $\text{CDCl}_3$ : 7.26 ppm for  $^1\text{H}$  and 77.16 ppm for  $^{13}\text{C}$ ). The quantitative  $^1\text{H}$  NMR was measured by using hexamethyldisilane as internal standard. The error in  $^1\text{H}$ -NMR integration amounts to about 5%. Peaks are described as singlet (s), doublet (d). Unless otherwise noted, spectra were recorded at 23 °C.

HRMS-ESI (High-Resolution Mass Spectrometry-Electro-Spray Ionisation) mass spectra were recorded by direct injection into a ThermoFisher Exactive Plus EMR Orbitrap mass spectrometer.

X-Ray diffraction data was obtained on a PHOTON-III CPAD (Bruker) equipped with a CCD detector. The structures were solved with the SHELXT 2014/5 structure solution program and refined with the SHELXL-2014/7 refinement package.<sup>1</sup> Artwork representations were processed using MERCURY software.<sup>2</sup>

X-Ray diffraction data collection was carried out on a Bruker PHOTON-III DUO Kappa CPAD diffractometer.

Commercially available chemicals were generally purchased from Sigma-Aldrich, Alfa Aesar, Fluorochem, TCI and were used without further purification. Solvents and reagent of pharmaceutical grade quality were purchased from Carlo Erba, and solvents of spectroscopic grade were purchased from Sigma-Aldrich and Fisher Chemical.  $\text{CDCl}_3$  was purchased from Euriso-TOP and filtered through basic alumina to remove traces of acidity before use.

## 2. List of the selected dialdehydes, polyamines, macrocycles and macrobicyclic cages

### Components

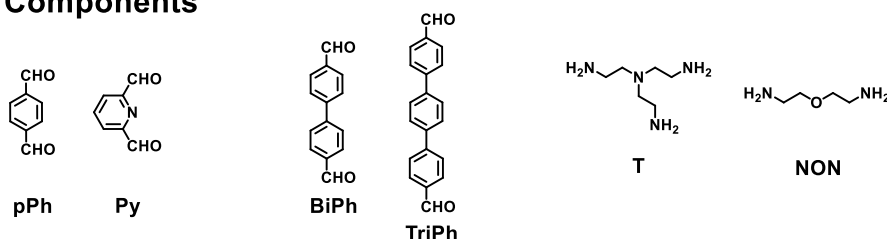

### Macrocycles

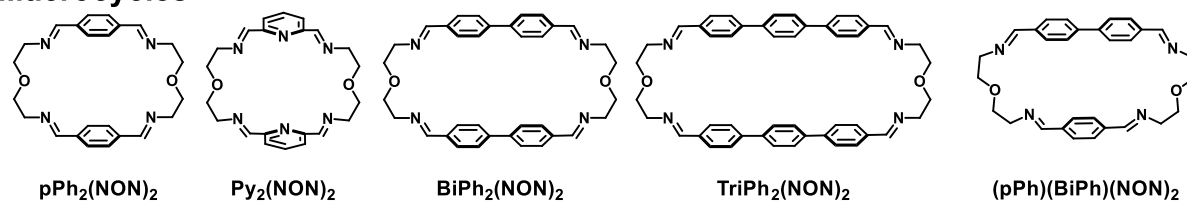

### Macrobicyclic Cages

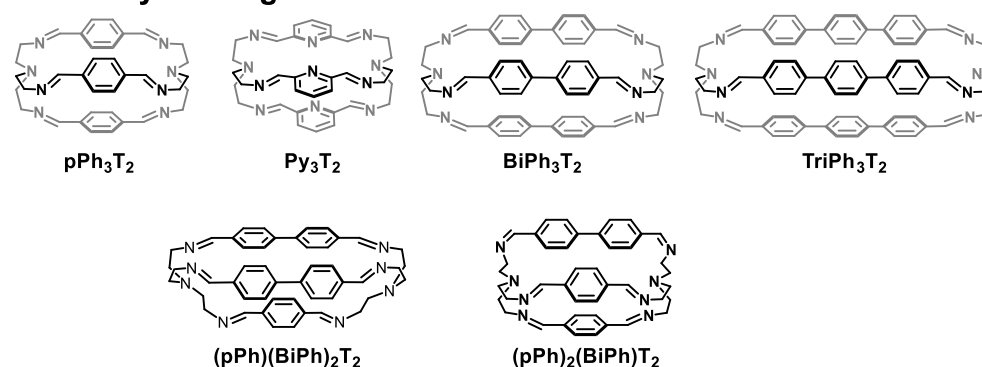

Scheme S1. All of aldehydes, amines and macrocycles, macrobicyclic cages that have been used in the text.

## 3. Experimental Method

### 3.1 Experimental methods for time-dependent <sup>1</sup>H NMR monitoring studies

#### a) Preparation of stock solutions

CDCl<sub>3</sub> was filtered through basic alumina oxide to remove traces of acidity before use. A stock solution of internal standard was made by adding 1.5 μL hexamethyldisilane into 2 mL CDCl<sub>3</sub>. The stock solutions of amines (NON, T) and dialdehydes were freshly prepared in CDCl<sub>3</sub> and quantified referencing to the internal standard (hexamethyldisilane). For all the cases, dialdehyde and polyamine were mixed in a proper stoichiometric ratio in CDCl<sub>3</sub> containing hexamethyldisilane as internal standard. The operation details were described as following:

#### b) formation of a single macrocycle

In an NMR tube, 30 mM solution of NON 72 μL (2 equiv.) was added into 528 μL CDCl<sub>3</sub> solution containing 2 equiv. dialdehyde and 40 μL internal standard solution. The final concentration of dialdehyde and NON was

3.6 mM. The reaction solution was monitored over time at 23-25 °C, until the equilibrium was reached. The composition of species was calculated according to the internal standard and presented on basis of imine integration data.

#### **c) formation of a single macrobicyclic cage**

In an NMR tube, 30 mM solution of **T** 48  $\mu\text{L}$  (2 equiv.) was added into 552  $\mu\text{L}$   $\text{CDCl}_3$  solution containing 3 equiv. dialdehyde (for instance **pPh**, **Py**, **BiPh**) and 40  $\mu\text{L}$  internal standard solution. The final concentration of dialdehyde and **T** was 3.6 mM and 2.4 mM, respectively. The reaction solution was monitored over time at 23-25 °C, until the equilibrium was reached. The composition of species was calculated according to the internal standard and presented on basis of imine integration data.

#### **d) self-sorting of 2pPh+2BiPh+4NON**

In an NMR tube, 30 mM solution of **NON** 156  $\mu\text{L}$  (4 equiv.) was added into 494  $\mu\text{L}$   $\text{CDCl}_3$  solution containing 2 equiv. dialdehyde **pPh**, 2 equiv. dialdehyde **BiPh** and 40  $\mu\text{L}$  internal standard solution. The final concentration of each dialdehydes and **NON** were 3.6 mM and 7.2 mM, respectively. The reaction solution was monitored over time at 23-25 °C, until the equilibrium was reached. The composition of species was calculated according to the internal standard and presented on basis of imine integration data.

#### **e) self-sorting of 3pPh+3BiPh+4T**

In an NMR tube, 30 mM solution of **T** 96  $\mu\text{L}$  (4 equiv.) was added into 504  $\mu\text{L}$   $\text{CDCl}_3$  solution containing 3 equiv. dialdehyde **pPh**, 3 equiv. dialdehyde **BiPh** and 40  $\mu\text{L}$  internal standard solution. The final concentration of each dialdehydes and **T** were 3.6 mM and 4.8 mM, respectively. The reaction solution was monitored over time at 23-25 °C, until the equilibrium was reached. The composition of species was calculated according to the internal standard and presented on basis of imine integration data.

#### **f) self-sorting of 2pPh+2BiPh+2TriPh+6NON**

In an NMR tube, 30 mM solution of **NON** 65  $\mu\text{L}$  (6 equiv.) was added into 585  $\mu\text{L}$   $\text{CDCl}_3$  solution containing dialdehyde **pPh**, **BiPh**, **TriPh** (2 equiv. of each) and 40  $\mu\text{L}$  internal standard solution. The final concentration of each dialdehydes were 1.0 mM and **NON** was 3.0 mM. The reaction solution was monitored over time at 40 °C, until the equilibrium was reached. The composition of species was calculated according to the internal standard and presented on basis of imine integration data.

#### **h) self-sorting of 3pPh+3BiPh+3TriPh+6T**

In an NMR tube, 30 mM solution of **T** 43  $\mu\text{L}$  (6 equiv.) was added into 607  $\mu\text{L}$   $\text{CDCl}_3$  solution containing dialdehyde **pPh**, **BiPh**, **TriPh** (3 equiv. of each) and 40  $\mu\text{L}$  internal standard solution. The final concentration of each dialdehydes and **T** were 1.0 mM and 2.0 mM, respectively. The reaction solution was monitored over time at 40 °C, until the equilibrium was reached. The composition of species was calculated according to the internal standard and presented on basis of imine integration data.

#### **i) self-sorting of 3pPh+3BiPh+3TriPh+2T+6NON**

In an NMR tube, 20 mM solution of **T** 22  $\mu\text{L}$  (2 equiv.) and 20 mM solution of **NON** 43  $\mu\text{L}$  (6 equiv.) were added into 585  $\mu\text{L}$   $\text{CDCl}_3$  solution containing dialdehyde **pPh**, **BiPh**, **TriPh** (3 equiv. of each) and 40  $\mu\text{L}$  internal standard solution. The final concentration of each dialdehydes were 1.0 mM. The reaction solution was monitored over time at 40 °C, until the equilibrium was reached. The composition of species was calculated according to the internal standard and presented on basis of imine integration data.

### j) self-sorting of 3Py+3pPh+3BiPh+3TriPh+2T+9NON

In an NMR tube, 20 mM solution of **T** 44  $\mu\text{L}$  (2 equiv.) and 100 mM solution of **NON** 40  $\mu\text{L}$  (9 equiv.) were added into 570  $\mu\text{L}$   $\text{CDCl}_3$  solution containing dialdehyde **Py**, **pPh**, **BiPh**, **TriPh** (3 equiv. of each) and 40  $\mu\text{L}$  internal standard solution. The final concentration of each dialdehydes were 2.0 mM. The reaction solution was monitored over time at 40  $^\circ\text{C}$ , until the equilibrium was reached. The composition of species was calculated according to the internal standard and presented on basis of imine integration data.

### 3.2 Experimental methods for time-dependent HRMS monitoring studies

The 30 mM stock solutions of amines (**NON**, **T**) and dialdehydes (**pPh**, **BiPh**) were freshly prepared in 50%-50%  $\text{CHCl}_3/\text{MeOH}$ . For all the cases, HRMS kinetic experiments were carried out under dialdehyde concentration of 2 mM and were monitored as a function of time.

### 3.3 NOTE

The time dependent course of the reactions was sensitive to the experimental conditions. The data are only qualitative as significant variations in rates have been obtained, possibly due to sensitivity to solvent acidity despite the filtration of the solvent over an alumina column. The reaction times  $t_{1/2}$  were markedly affected by the aluminium oxide used to treat the  $\text{CDCl}_3$  (acidity and water) used as the solvent. To verify how could different qualities of alumina can affect the reaction courses, three different kinds of experiments were carried out: 1) experiments with fresh opened aluminum treated  $\text{CDCl}_3$ ; 2) experiments with a dated aluminum treated  $\text{CDCl}_3$ . We verified that with different qualities of alumina giving these different time dependence curves, the sequence of reaction processes remained the same. For example, in the case of **pPh/NON** system, the half-consumption  $t_{1/2}^{\text{C}}$  of **pPh** could vary from 270 min (for dated alumina treated  $\text{CDCl}_3$ ) to 720 min (for fresh alumina treated  $\text{CDCl}_3$ ) and the half formation time  $t_{1/2}^{\text{F}}$  of the **pPh<sub>2</sub>(NON)<sub>2</sub>** macrocycle from 660 min to 2200 min in the same conditions. We verified that with different qualities of alumina giving these different time dependence curves, the sequence of reaction processes remained the same, with the sequence of three intermediates, and finally, yielded nearly 99% of **pPh<sub>2</sub>(NON)<sub>2</sub>** macrocycle as illustrated in Figs. S6 and S8 for more detailed information. Unless otherwise noted, the  $\text{CDCl}_3$  is treated with fresh opened aluminum before using for  $^1\text{H}$  NMR kinetic experiments.

## 4. Synthesis and Characterization

### 4.1 Synthesis of [1,1':4',1''-Terphenyl]-4,4''-dicarboxaldehyde (TriPh)

[1,1':4',1''-Terphenyl]-4,4''-dicarboxaldehyde was prepared via Suzuki–Miyaura Cross-coupling according to previously reported procedures.<sup>3</sup> The characterizations were consistent with the literature values.

$^1\text{H}$  NMR (400 MHz,  $\text{CDCl}_3$ ):  $\delta$ .  $\delta$  10.08 (s, 2H), 8.00-7.98 (d, 8Hz, 4H), 7.83-7.81 (d, 8Hz, 4H), 7.77 (s, 4H)

## 4.2 Synthesis of macrocycle $\text{TriPh}_2(\text{NON})_2$

[1,1':4':1'']Terphenyl-4,4''-dicarbaldehyde (**TriPh**) (36.41 mg; 0.13 mmol) was dissolved in 8 mL  $\text{CHCl}_3$ . Then, the solution was further diluted with 5 mL MeCN. Thereafter, a MeCN (3 mL) solution of 2,2'-oxybis(ethylamine) (**NON**) (12.90 mg; 0.12 mmol) was added in five portions during 20 minutes. The reaction mixture was stirred at room temperature for 7 days. After removal of the solvent by centrifugation, the crude product was washed with MeCN and dried in vacuum to afford macrocycle  $\text{TriPh}_2(\text{NON})_2$  as ivory solids (38.97 mg, 88 %).

$^1\text{H}$  NMR (500 MHz,  $\text{CDCl}_3$ , 25 °C):  $\delta$  = 8.23 (s, 4H), 7.48 (t,  $J$  = 7.5 Hz, 8H), 7.38–7.35 (m, 16H), 3.80–3.70 (m, 16H)

$^{13}\text{C}$  NMR (125 MHz,  $\text{CDCl}_3$ , 23 °C):  $\delta$  = 162.62, 142.06, 139.38, 135.18, 128.58, 127.39, 126.79, 69.28, 60.47

HRMS (ESI+):  $m/z$  calcd for  $\text{C}_{36}\text{H}_{36}\text{N}_4\text{O}_2$   $[\text{M}+\text{Na}]^+$  731.3356, found 731.3339

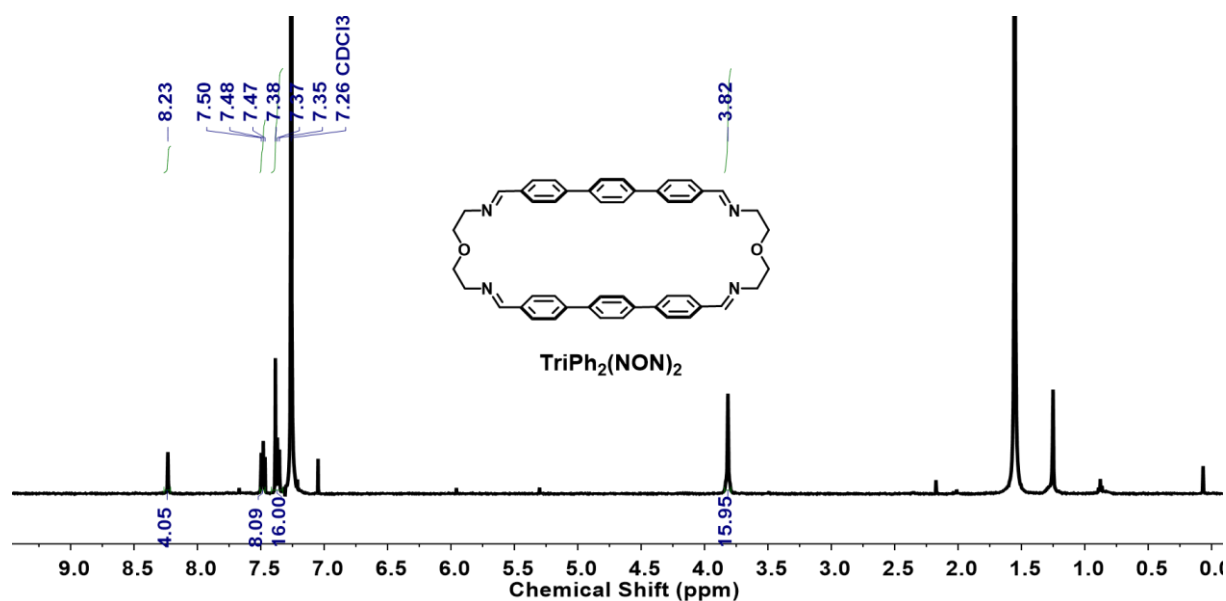

Fig. S1  $^1\text{H}$  NMR spectra (500 MHz,  $\text{CDCl}_3$ , 25 °C) of Macrocycle  $\text{TriPh}_2(\text{NON})_2$ .

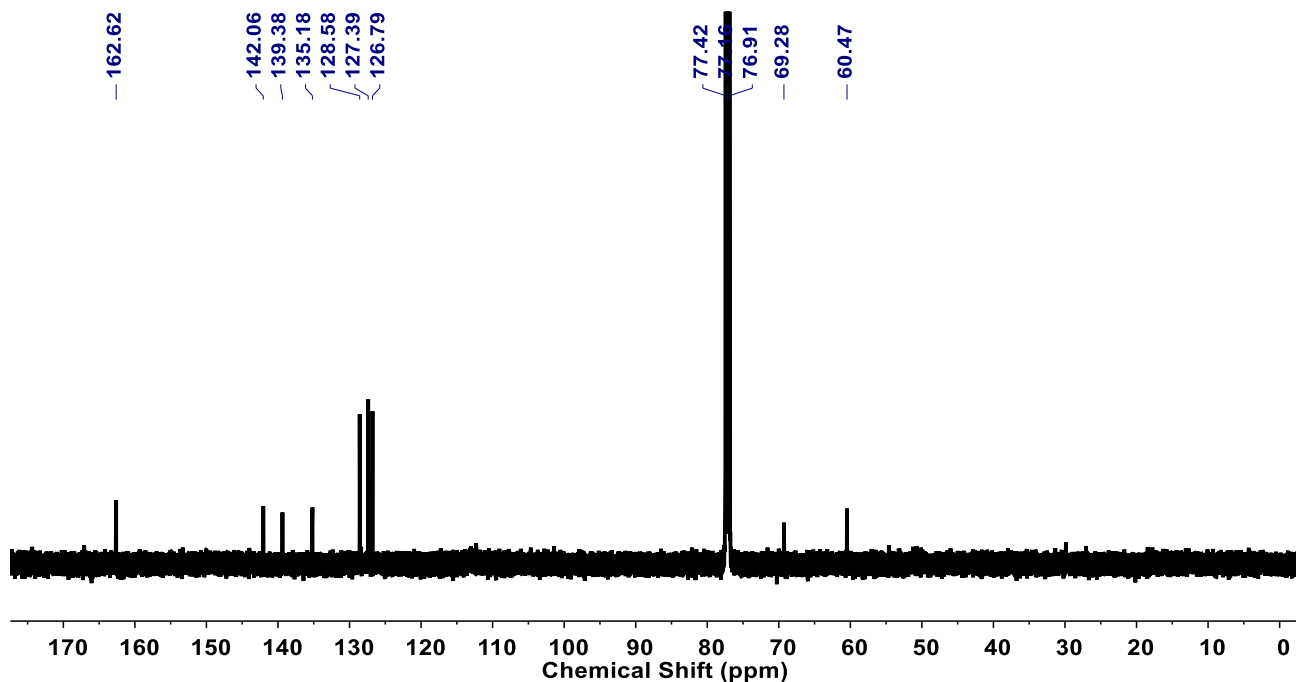

Fig. S2  $^{13}\text{C}$  NMR spectra (125 MHz,  $\text{CDCl}_3$ , 25 °C) of Macrocycle  $\text{TriPh}_2(\text{NON})_2$ .

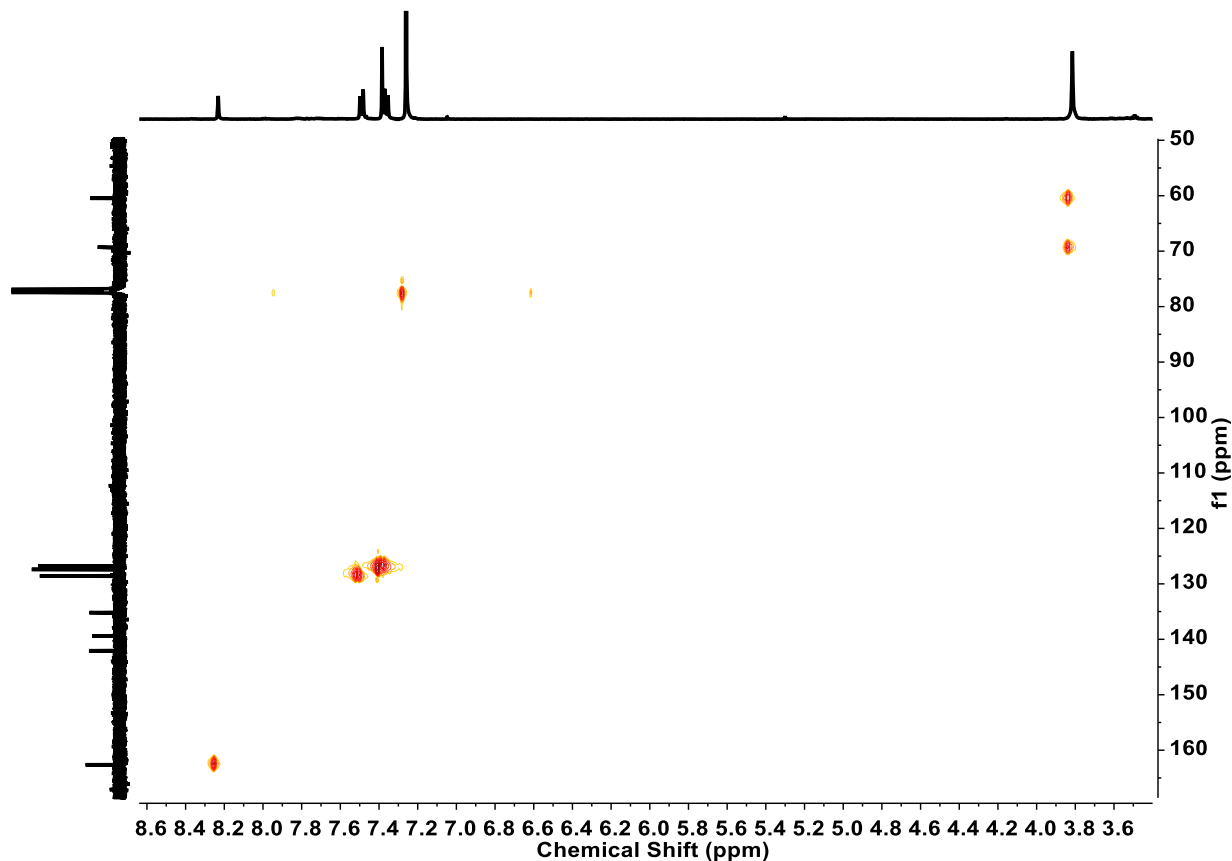

Fig. S3 HSQC spectra (500 MHz of  $^1\text{H}$ , 125 MHz of  $^{13}\text{C}$ ,  $\text{CDCl}_3$ , 23  $^\circ\text{C}$ ) of Macrocycle  $\text{TriPh}_2(\text{NON})_2$ .

### 4.3. Synthesis of Macrobicyclic Cage $\text{TriPh}_3\text{T}_2$

[1,1':4':1'']Terphenyl-4,4''-dicarbaldehyde (**TriPh**) (33.15 mg; 0.12 mmol) was dissolved in 8 mL  $\text{CHCl}_3$ . Then, the solution was further diluted with 3 mL MeOH. Thereafter, a MeOH (2 mL) solution of Tris(2-aminoethyl)amine (**T**) (11.07 mg; 0.076 mmol) was added in five portions during 20 minutes. The reaction mixture was stirred at room temperature for 3 days. After removal of the solvent by centrifugation, the crude product was washed with 1 mL  $\text{CHCl}_3$  and MeOH, then dried in vacuum to afford macrobicyclic cage  $\text{TriPh}_3\text{T}_2$  as yellow solids (30.21 mg, 76 %).

$^1\text{H}$  NMR (400 MHz,  $\text{CDCl}_3$ , 25  $^\circ\text{C}$ ):  $\delta$  = 8.30 (s, 6H), 7.31-7.22 (m,  $\text{CDCl}_3$  included), 7.19-7.16 (m, 24H), 3.85 (m, 12H), 2.84 (m, 12H)

HRMS (ESI+):  $m/z$  calcd for  $[\text{M}+\text{H}]^+$  1043.5483, found 1043.5463.

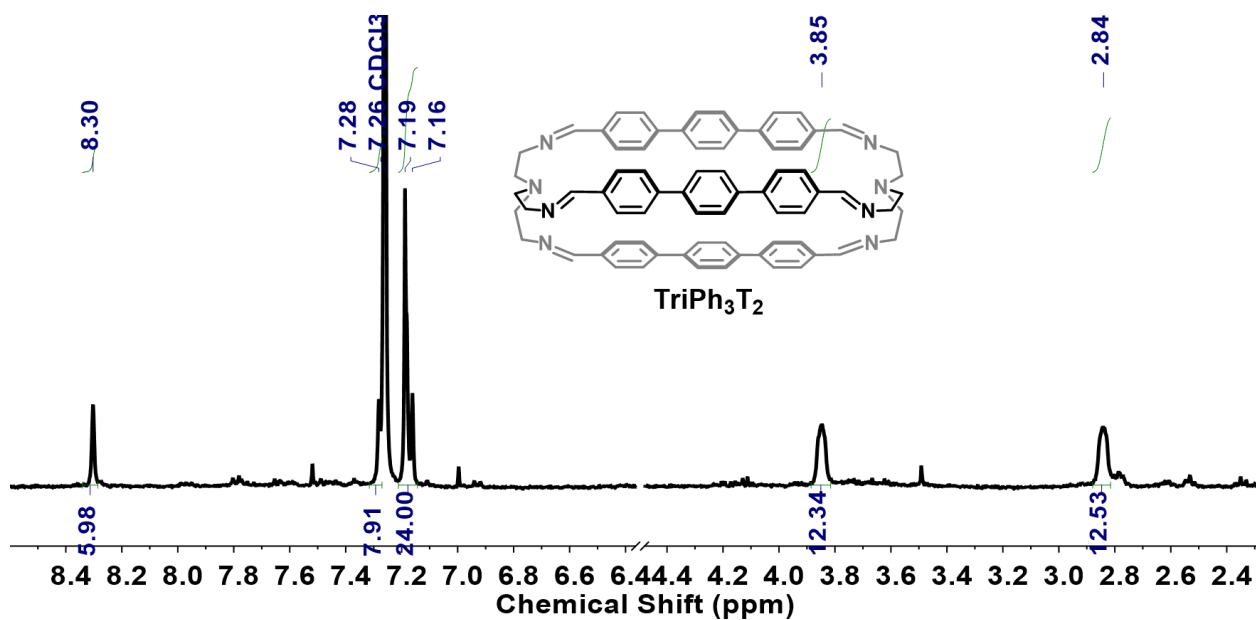

Fig. S4  $^1\text{H}$  NMR spectra (500 MHz,  $\text{CDCl}_3$ , 25  $^\circ\text{C}$ ) of macrobicyclic cage  $\text{TriPh}_3\text{T}_2$

The synthesis procedure of the other macrocycles and macrobicyclic cages are reported in our previous papers.<sup>4,5</sup>



## 5. Formation of isolated macrocycles

### 5.1 Formation of macrocycle $pPh_2(NON)_2$

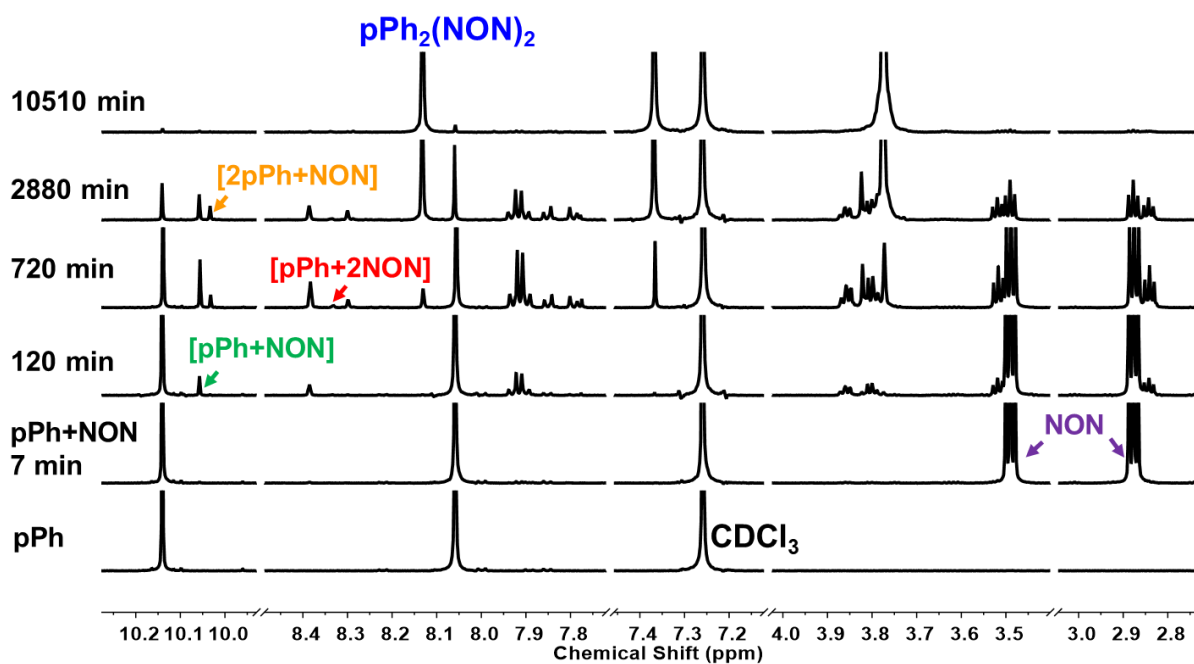

**Fig. S5** Temporal evolution of the  $^1H$  NMR spectra (500 MHz,  $CDCl_3$ , 23 °C) showing the formation of intermediates and of the final macrocycle  $pPh_2(NON)_2$  in fresh aluminum treated  $CDCl_3$ .

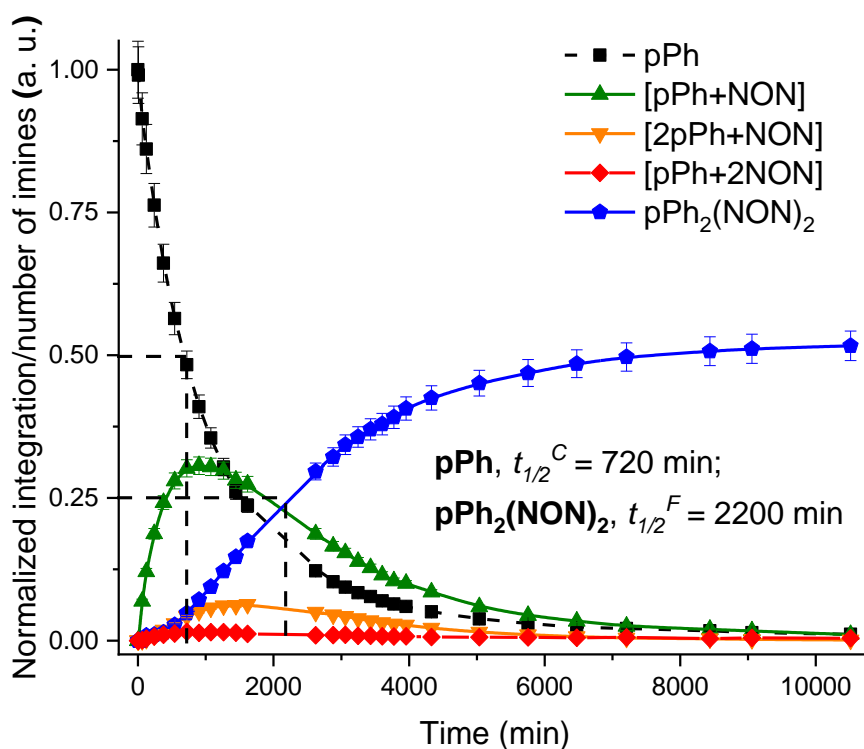

**Fig. S6**  $^1H$  NMR monitoring during the formation of macrocycle  $pPh_2(NON)_2$  in freshly opened aluminum treated  $CDCl_3$ .

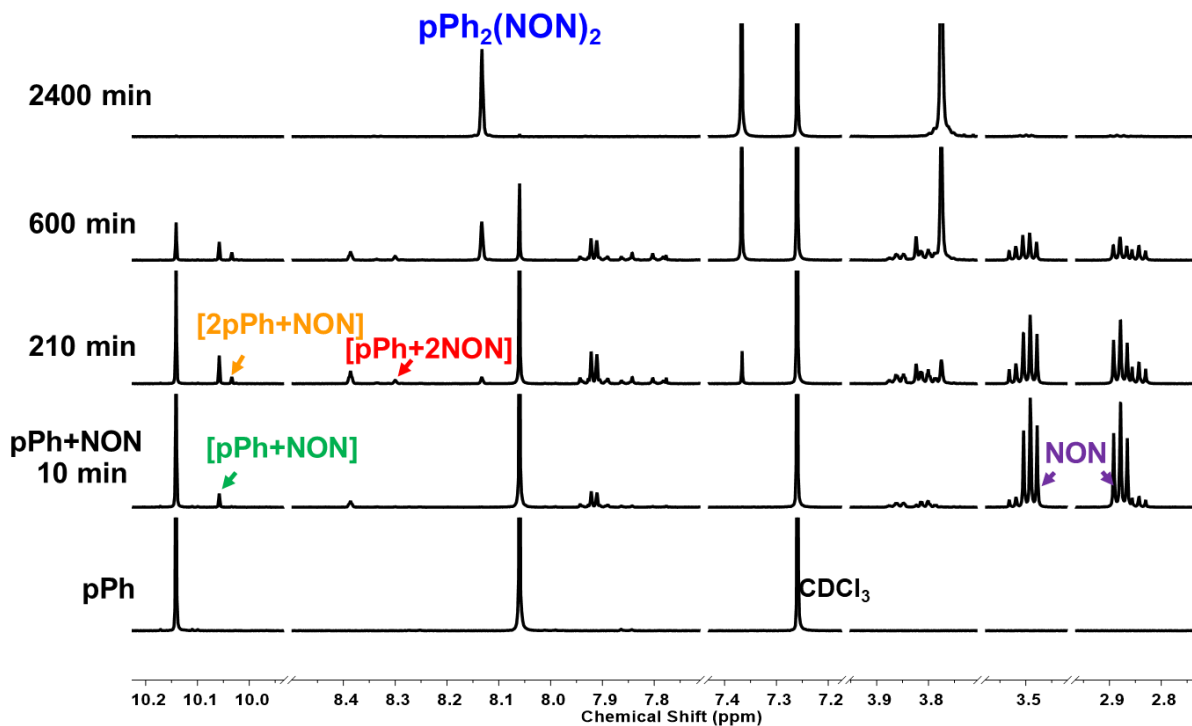

**Fig. S7** Temporal evolution of the  $^1\text{H}$  NMR spectra (500 MHz,  $\text{CDCl}_3$ , 23  $^\circ\text{C}$ ) showing the formation of intermediates and of the final macrocycle  $\text{pPh}_2(\text{NON})_2$  in dated aluminum treated  $\text{CDCl}_3$ .

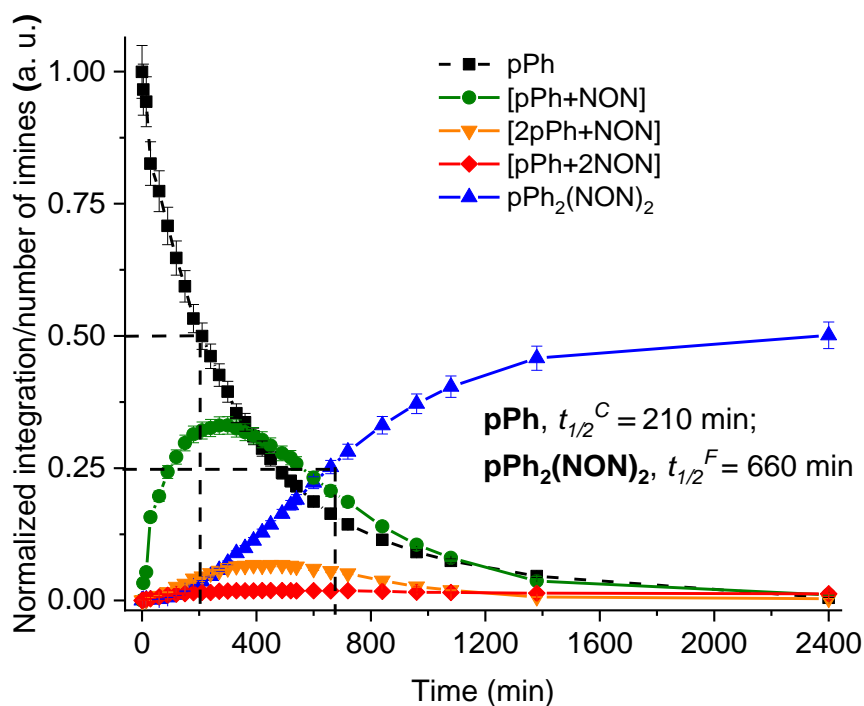

**Fig. S8**  $^1\text{H}$  NMR monitoring during the formation of macrocycle  $\text{pPh}_2(\text{NON})_2$  in dated aluminum treated  $\text{CDCl}_3$ .

## 5.2 Formation of macrocycle $\text{BiPh}_2(\text{NON})_2$

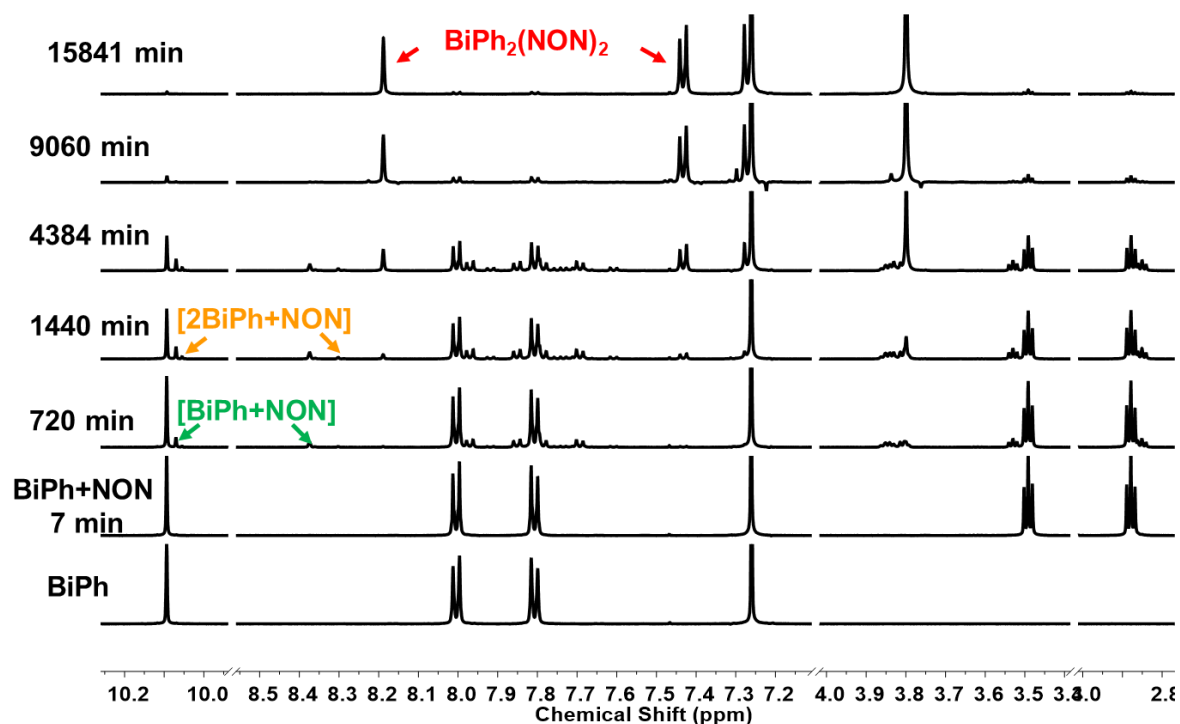

**Fig. S9** Temporal evolution of the  $^1\text{H}$  NMR spectra (500 MHz,  $\text{CDCl}_3$ ) of a 1/1 mixture of **BiPh** and **NON** (3.6 mM) showing the formation of two intermediates and of the final macrocycle **BiPh<sub>2</sub>(NON)<sub>2</sub>**.

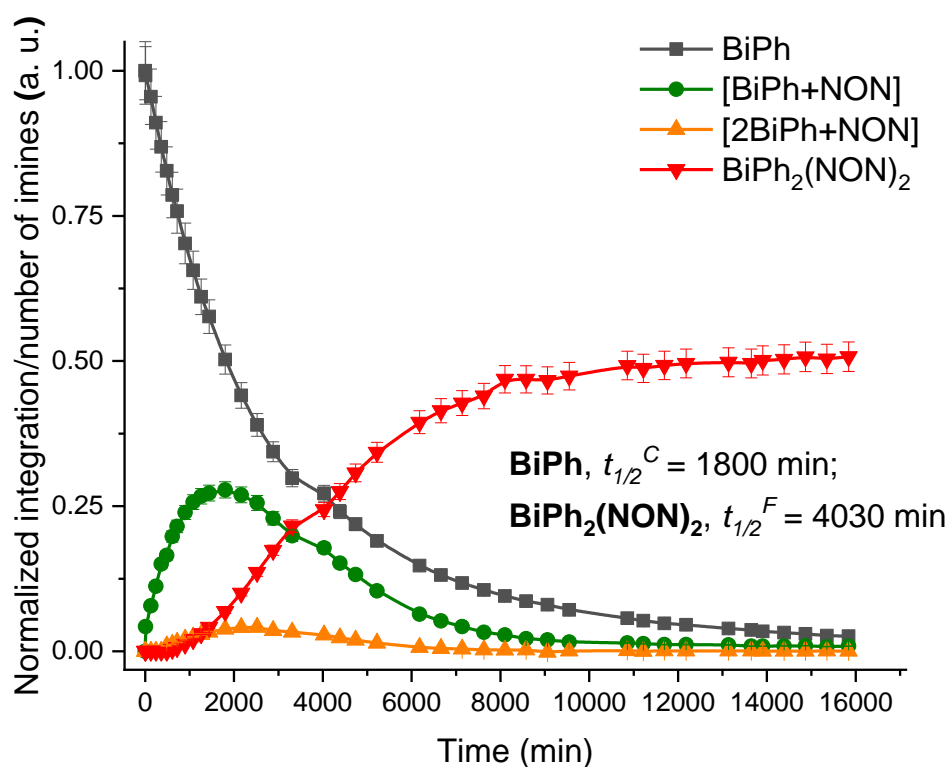

**Fig. S10**  $^1\text{H}$  NMR monitoring of the evolution of a 1/1 mixture of components **BiPh** and **NON** (3.6 mM each in  $\text{CDCl}_3$ ) as a function of time over 15841 min. Error in  $^1\text{H}$ -NMR signal integration:  $\pm 5\%$ .

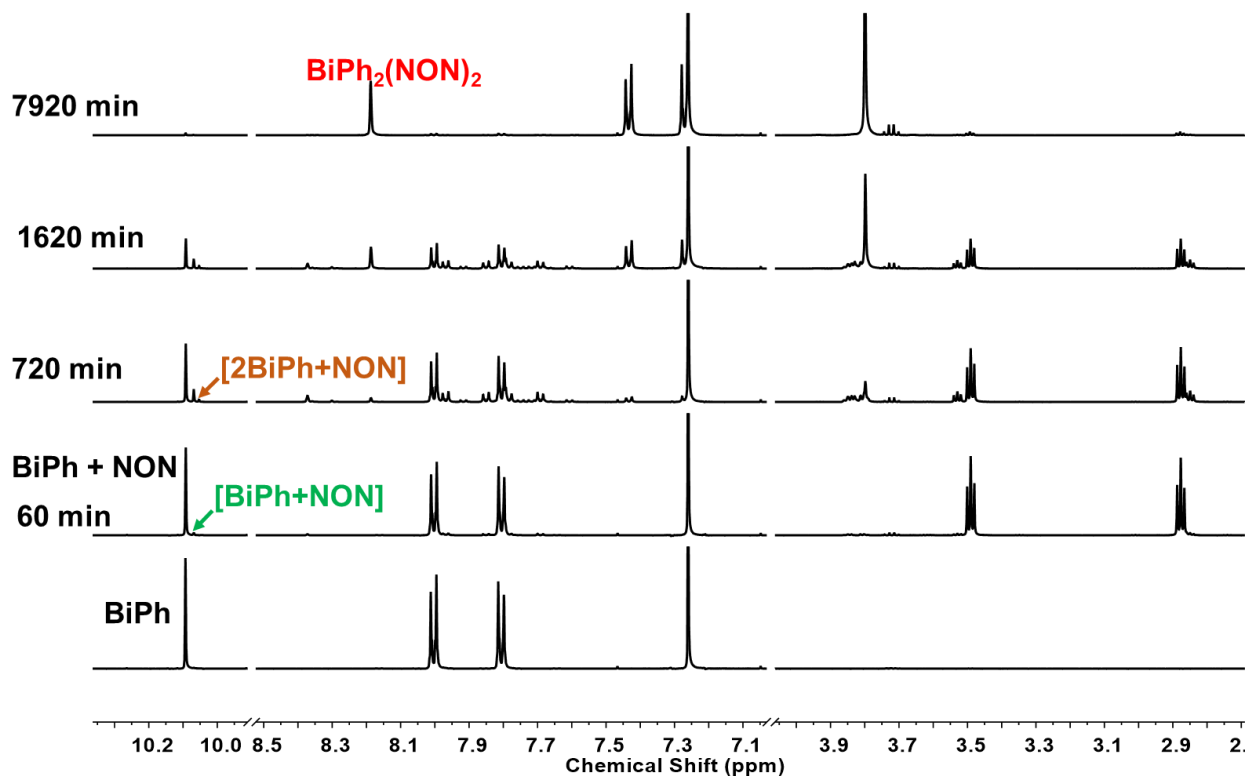

**Fig. S11** Temporal evolution of the  $^1\text{H}$  NMR spectra (500 MHz, 23 °C, dated aluminum treated  $\text{CDCl}_3$ ) showing the formation of intermediates and of the final macrocycle  $\text{BiPh}_2(\text{NON})_2$  in dated aluminum treated  $\text{CDCl}_3$ .

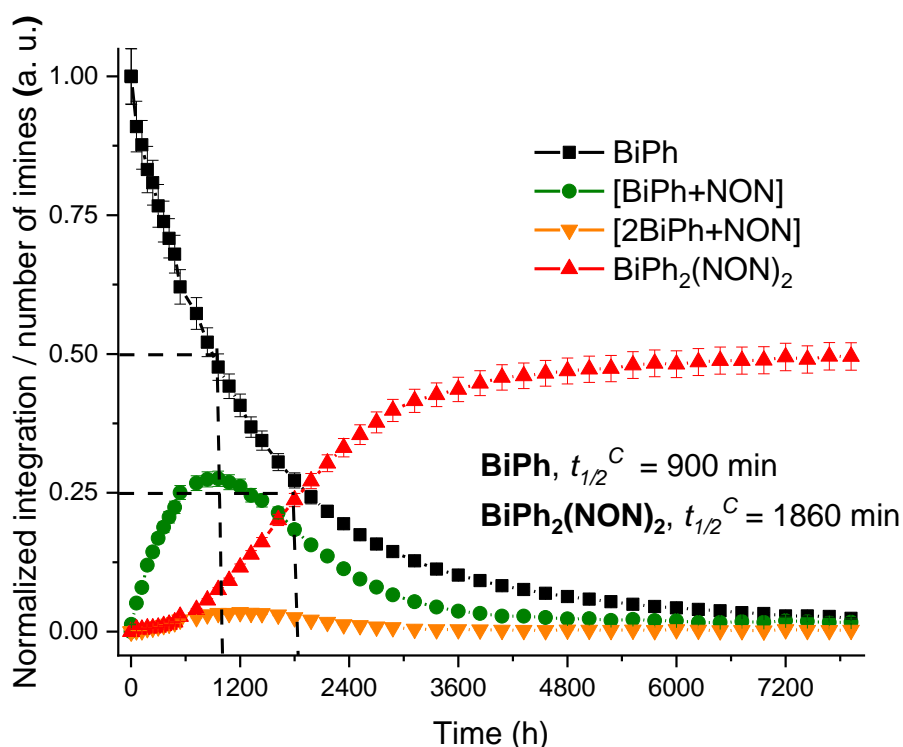

**Fig. S12**  $^1\text{H}$  NMR monitoring of the evolution of the species generated during macrocycle  $\text{BiPh}_2(\text{NON})_2$  formation in dated aluminum treated  $\text{CDCl}_3$  as a function of time over 7920 min. Error in  $^1\text{H}$ -NMR signal integration:  $\pm 5\%$ .

### 5.3 Formation of macrocycle $\text{Py}_2(\text{NON})_2$

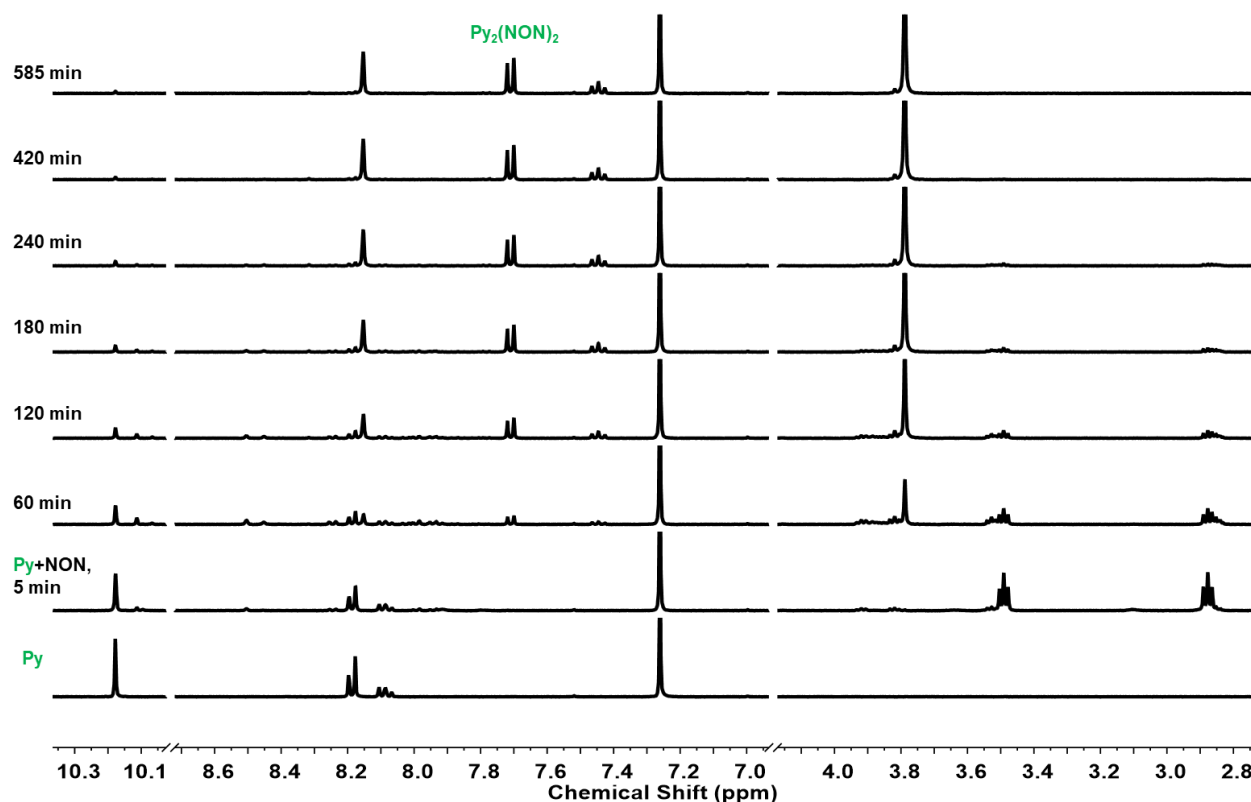

**Fig. S13** Temporal evolution of the  $^1\text{H}$  NMR spectra (400 MHz,  $\text{CDCl}_3$ , 21  $^\circ\text{C}$ ) of a 1/1 mixture of **Py** and **NON** (3.6 mM) showing the formation of two intermediates and of the final macrocycle  $\text{Py}_2(\text{NON})_2$ .

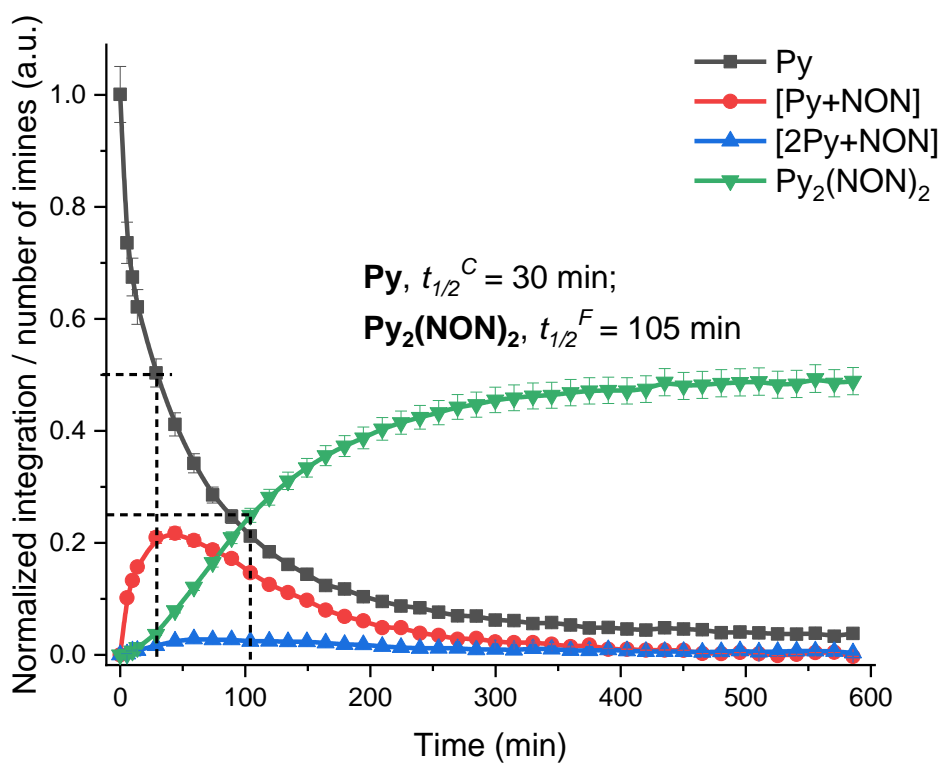

**Fig. S14**  $^1\text{H}$  NMR monitoring of the evolution of a 1/1 mixture of components **Py** and **NON** (3.6 mM each in  $\text{CDCl}_3$ ) as a function of time over 586 min. Error in  $^1\text{H}$ -NMR signal integration:  $\pm 5\%$ .

## 5.4 Time-dependent HRMS of macrocycle pPh<sub>2</sub>(NON)<sub>2</sub>

**Table S1.** HRMS-ESI assignments of the Key Species Identified during the formation process of macrocycle pPh<sub>2</sub>(NON)<sub>2</sub>

| Entry | assignment                    | formula                                                       | Combined ion     | m/z calcd. | m/z found |
|-------|-------------------------------|---------------------------------------------------------------|------------------|------------|-----------|
| 1     | NON                           | C <sub>4</sub> H <sub>12</sub> N <sub>2</sub> O               | +H <sup>+</sup>  | 105.1022   | 105.1024  |
|       |                               |                                                               | +Na <sup>+</sup> | 127.0842   | 127.0840  |
| 2     | [pPh+NON]-H <sub>2</sub> O    | C <sub>12</sub> H <sub>16</sub> N <sub>2</sub> O <sub>2</sub> | +H <sup>+</sup>  | 221.1285   | 221.1276  |
|       |                               |                                                               | +Na <sup>+</sup> | 243.1104   | 243.1095  |
|       |                               |                                                               | +2H <sup>+</sup> | 111.0679   | N/A       |
| 3     | [pPh+2NON]-2H <sub>2</sub> O  | C <sub>16</sub> H <sub>26</sub> N <sub>4</sub> O <sub>2</sub> | +H <sup>+</sup>  | 307.2129   | 307.2115  |
|       |                               |                                                               | +Na <sup>+</sup> | 329.1948   | 329.1934  |
|       |                               |                                                               | +2H <sup>+</sup> | 154.1101   | 154.1095  |
| 4     | [2pPh+NON]-2H <sub>2</sub> O  | C <sub>20</sub> H <sub>20</sub> N <sub>2</sub> O <sub>3</sub> | +H <sup>+</sup>  | 337.1547   | 337.1531  |
|       |                               |                                                               | +Na <sup>+</sup> | 359.1372   | 359.1351  |
|       |                               |                                                               | +2H <sup>+</sup> | 169.0810   | N/A       |
| 5     | [2pPh+2NON]-3H <sub>2</sub> O | C <sub>24</sub> H <sub>30</sub> N <sub>4</sub> O <sub>3</sub> | +H <sup>+</sup>  | 423.2391   | N/A       |
|       |                               |                                                               | +Na <sup>+</sup> | 445.2210   | 445.2193  |
|       |                               |                                                               | +2H <sup>+</sup> | 212.1232   | 212.1386  |
| 6     | [2pPh+2NON]-4H <sub>2</sub> O | C <sub>24</sub> H <sub>28</sub> N <sub>4</sub> O <sub>2</sub> | +H <sup>+</sup>  | 405.2285   | 405.2269  |
|       |                               |                                                               | +Na <sup>+</sup> | 427.2104   | 427.2089  |
|       |                               |                                                               | +2H <sup>+</sup> | 203.1179   | N/A       |

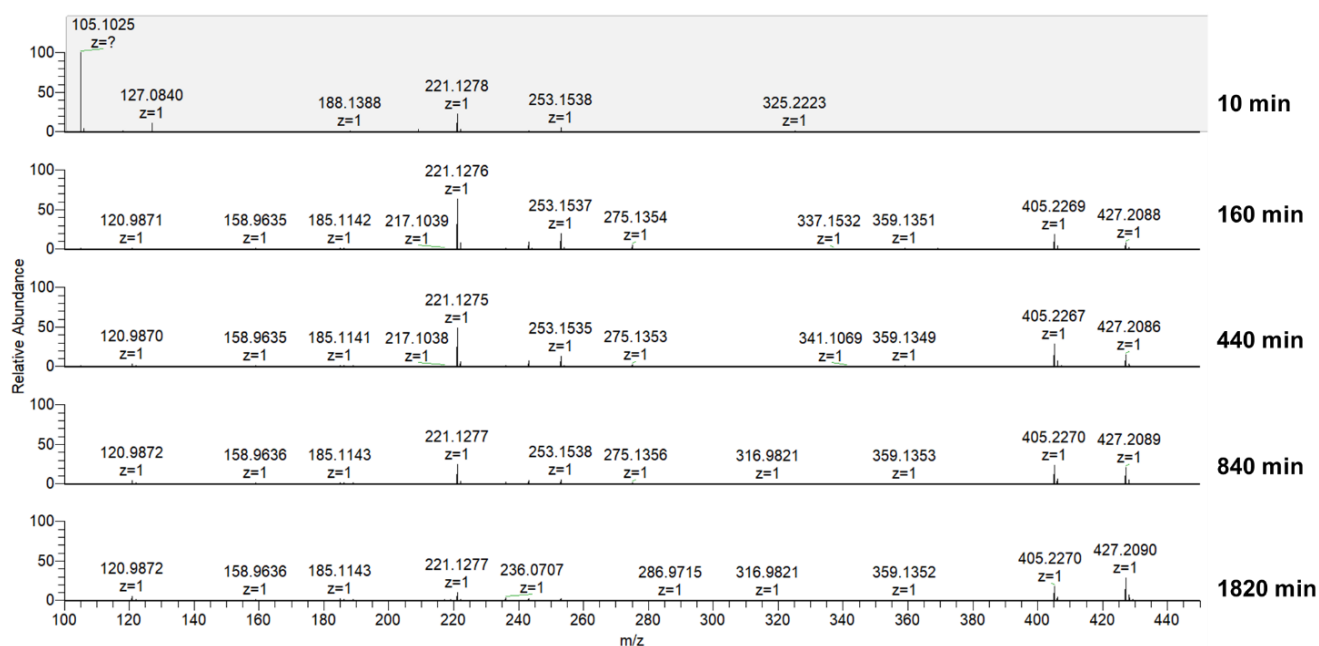

**Fig. S15** Evolution of the HRMS-ESI spectra of a 1/1 mixture of pPh and NON (2 mM each in 50%-50% CHCl<sub>3</sub>/MeOH).

## 5.5 Time-dependent HRMS of macrocycle BiPh<sub>2</sub>(NON)<sub>2</sub>

**Table S2.** HRMS-ESI assignment of the Key Species Identified during the formation process of macrocycle BiPh<sub>2</sub>(NON)<sub>2</sub>

| Entry | assignment                     | formula                                                       | Combined ion     | m/z calcd. | m/z found |
|-------|--------------------------------|---------------------------------------------------------------|------------------|------------|-----------|
| 1     | NON                            | C <sub>4</sub> H <sub>12</sub> N <sub>2</sub> O               | +H <sup>+</sup>  | 105.1022   | 105.1028  |
|       |                                |                                                               | +Na <sup>+</sup> | 127.0842   | 127.0844  |
| 2     | [BiPh+NON]-H <sub>2</sub> O    | C <sub>18</sub> H <sub>20</sub> N <sub>2</sub> O <sub>2</sub> | +H <sup>+</sup>  | 297.1598   | 297.1597  |
|       |                                |                                                               | +Na <sup>+</sup> | 319.1417   | 319.1416  |
|       |                                |                                                               | +2H <sup>+</sup> | 149.0835   | N/A       |
| 3     | [BiPh+2NON]-2H <sub>2</sub> O  | C <sub>22</sub> H <sub>30</sub> N <sub>4</sub> O <sub>2</sub> | +H <sup>+</sup>  | 383.2442   | 383.2412  |
|       |                                |                                                               | +Na <sup>+</sup> | 405.2261   | 405.2258  |
|       |                                |                                                               | +2H <sup>+</sup> | 192.1257   | 192.1256  |
| 4     | [2BiPh+NON]-2H <sub>2</sub> O  | C <sub>32</sub> H <sub>28</sub> N <sub>2</sub> O <sub>3</sub> | +H <sup>+</sup>  | 489.2173   | 489.2140  |
|       |                                |                                                               | +Na <sup>+</sup> | 511.1992   | 511.1960  |
|       |                                |                                                               | +2H <sup>+</sup> | 245.1123   | N/A       |
| 5     | [2BiPh+2NON]-3H <sub>2</sub> O | C <sub>36</sub> H <sub>38</sub> N <sub>4</sub> O <sub>3</sub> | +H <sup>+</sup>  | 575.3017   | 575.2980  |
|       |                                |                                                               | +Na <sup>+</sup> | 597.2836   | 597.2926  |
|       |                                |                                                               | +2H <sup>+</sup> | 288.1545   | N/A       |
| 6     | [2BiPh+2NON]-4H <sub>2</sub> O | C <sub>36</sub> H <sub>36</sub> N <sub>4</sub> O <sub>2</sub> | +H <sup>+</sup>  | 557.2911   | 557.2876  |
|       |                                |                                                               | +Na <sup>+</sup> | 579.2730   | 579.2696  |
|       |                                |                                                               | +2H <sup>+</sup> | 279.1492   | 279.1473  |

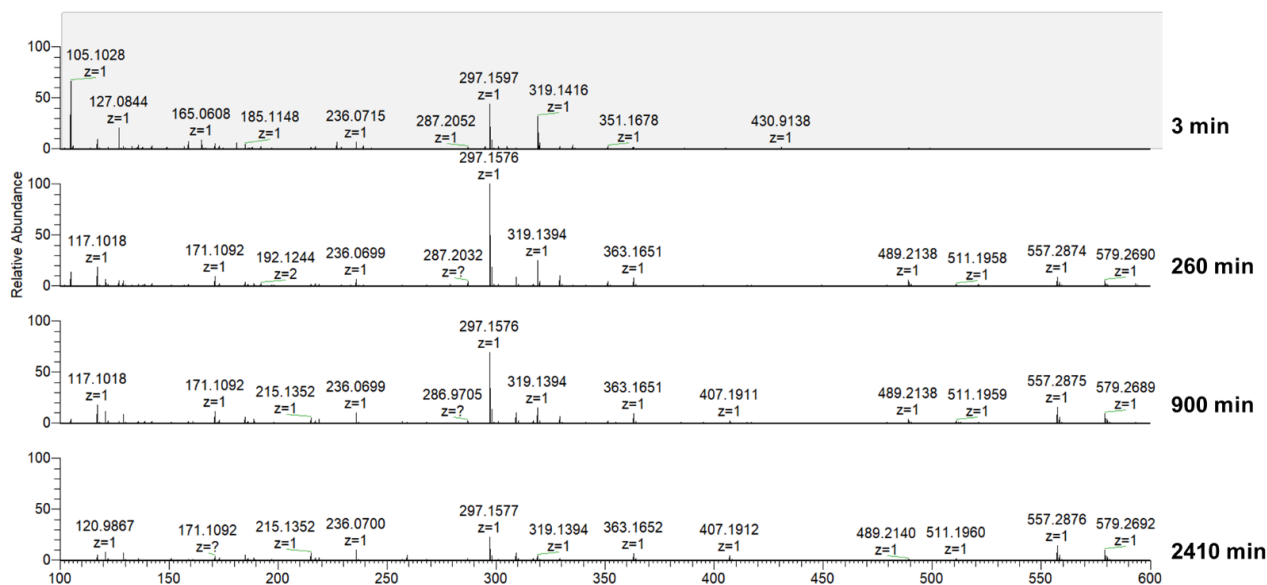

**Fig. S16** Evolution of the HRMS-ESI spectra of a 1/1 mixture of BiPh and NON (2 mM each in 50%-50% CHCl<sub>3</sub>/MeOH).

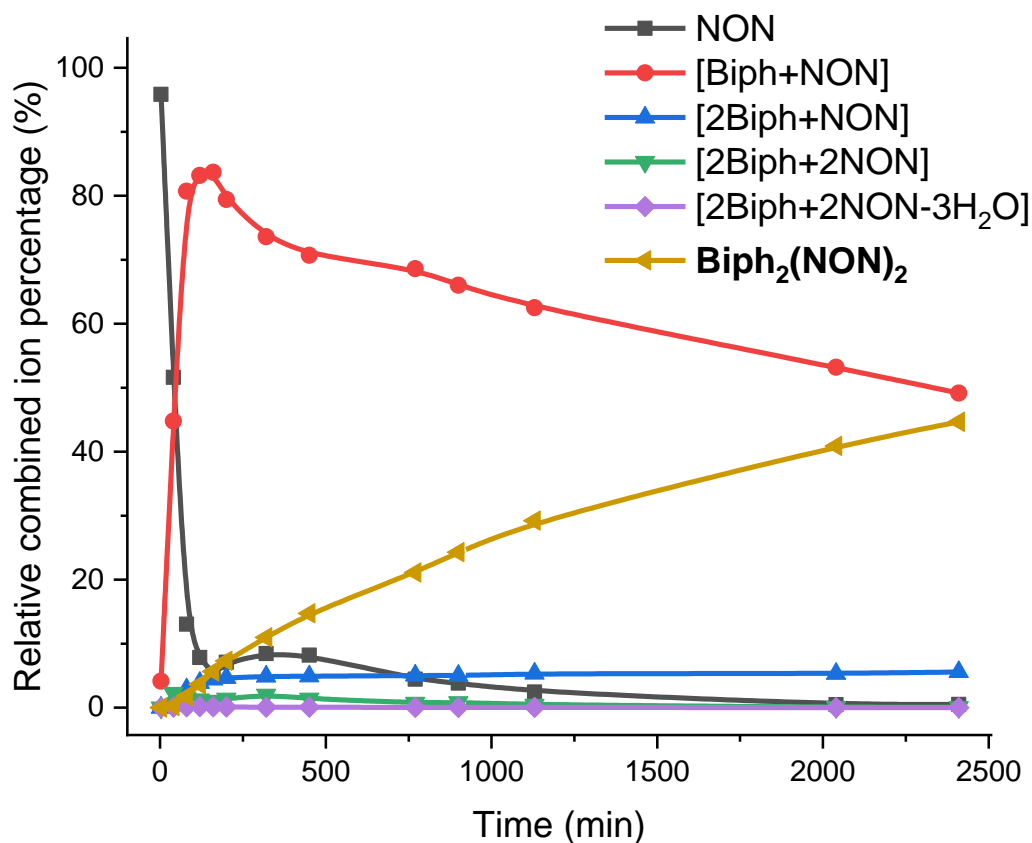

**Fig. S17** HRMS-ESI monitoring of the evolution of the species generated during the formation of the macrocycle **BiPh<sub>2</sub>(NON)<sub>2</sub>** from **BiPh** and **NON** (2 mM each, 50%-50% CHCl<sub>3</sub>/MeOH, r.t) as a function of time over 2410 min. NB: The relative combined ion percentage is obtained by the ratio of combined ion count of each species to the sum of combined ion counts for all species at each time point. These data do not provide quantitative information about the relative amounts of each species identified by its mass, but, taken separately, they display the evolution of a given identified species during the course of the reaction. The curves are added to guide the eye.



## 6. Formation of isolated macrobicyclic cages

### 6.1 Time-dependent $^1\text{H}$ NMR of macrobicyclic cage $\text{pPh}_3\text{T}_2$

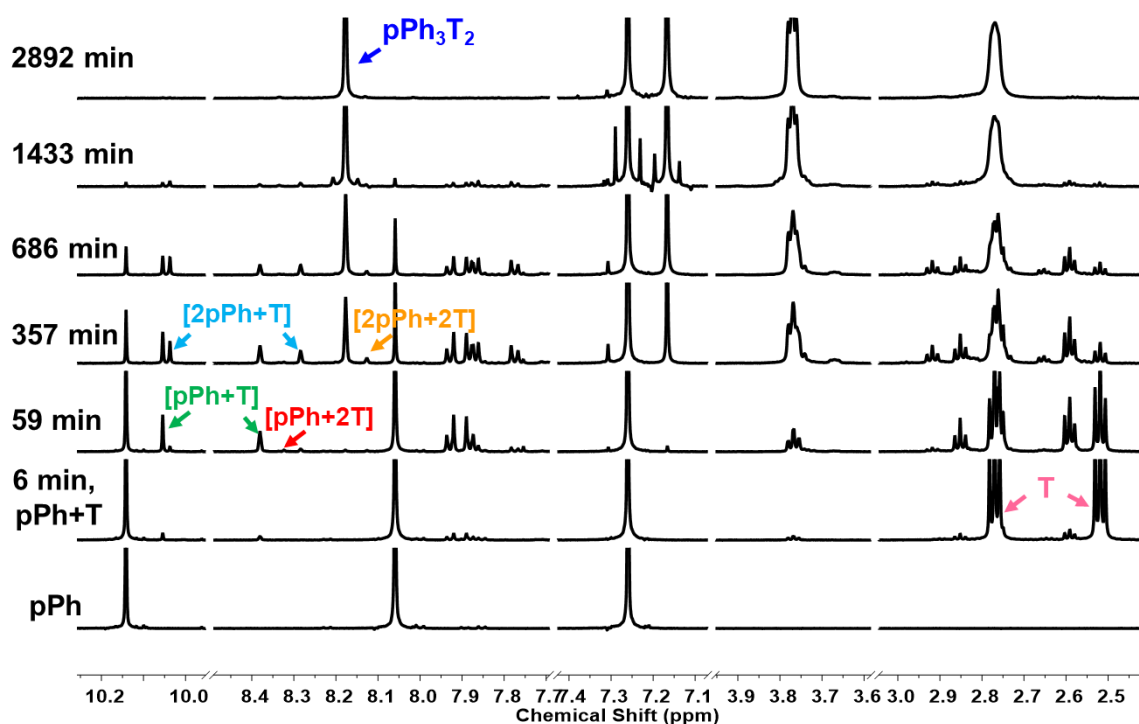

**Fig. S18** Temporal evolution of the  $^1\text{H}$  NMR spectra (500 MHz,  $\text{CDCl}_3$ , 23  $^\circ\text{C}$ ) of a 3/2 mixture of  $\text{pPh}$  (3.6 mM) and  $\text{T}$  showing the formation of intermediates and of the final macrobicyclic cage  $\text{pPh}_3\text{T}_2$ .

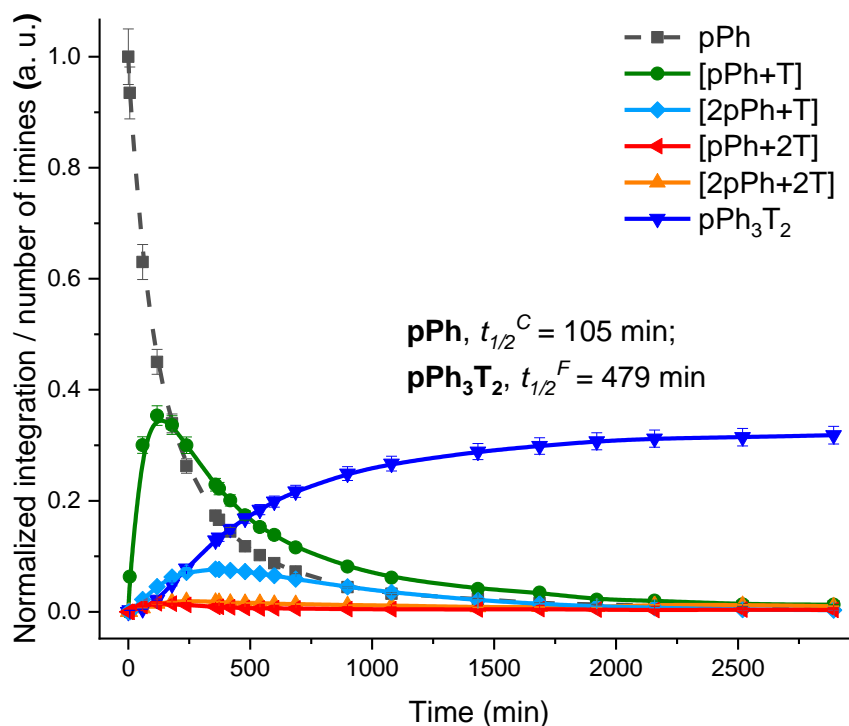

**Fig. S19**  $^1\text{H}$  NMR monitoring of the evolution of the species generated during cage  $\text{pPh}_3\text{T}_2$  formation as a function of time over 2892 min. Error in  $^1\text{H}$ -NMR signal integration:  $\pm 5\%$ .

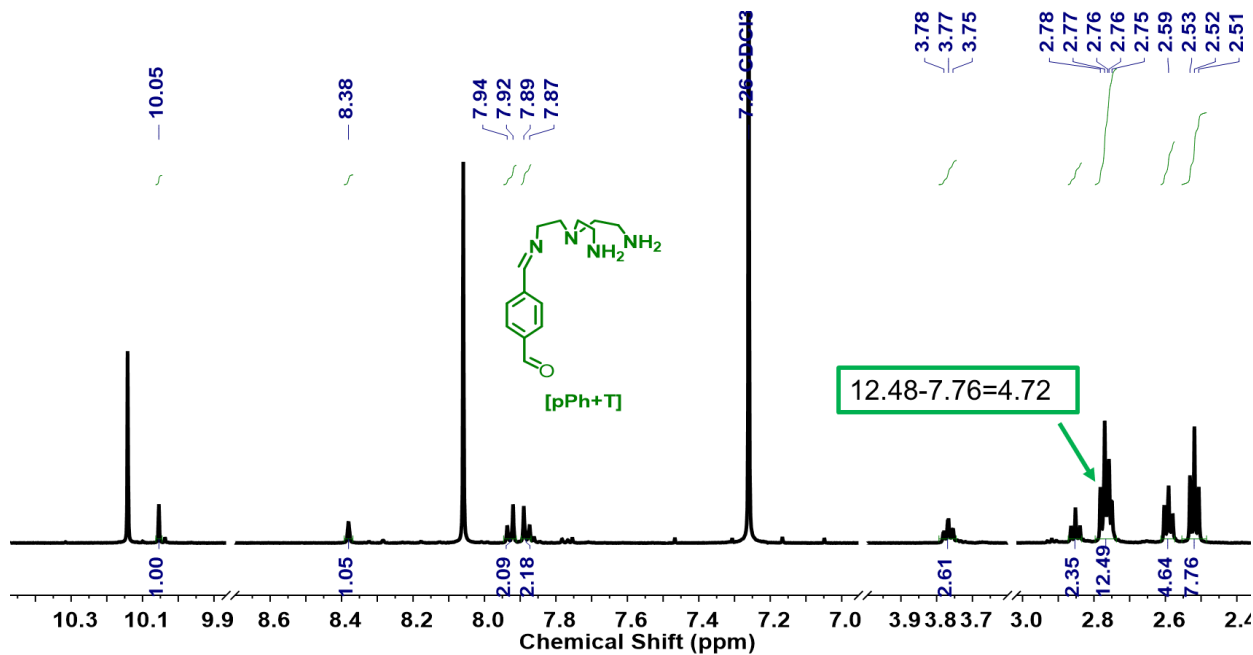

Fig. S20 <sup>1</sup>H NMR spectra (400 MHz, CDCl<sub>3</sub>) of the intermediate [pPh+T] after 59 min condensation of pPh (3.6 mM) and T (2.4 mM).

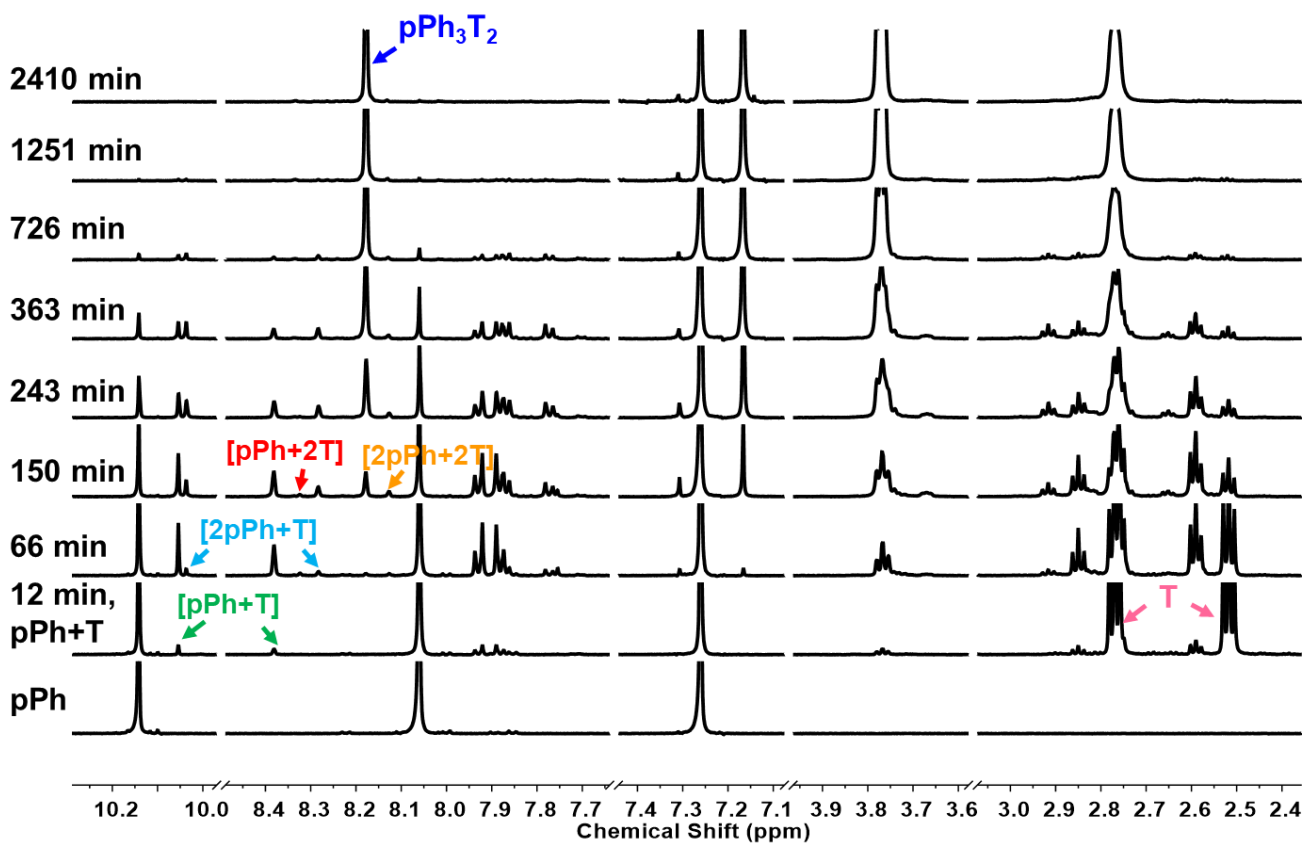

Fig. S21 Temporal evolution of the <sup>1</sup>H NMR spectra (500 MHz, CD<sub>3</sub>Cl, 23 °C) of a 3/2 mixture of pPh (3.6 mM) and T (2.4 mM) showing the formation of several intermediates and of the final macrobicyclic cage pPh<sub>3</sub>T<sub>2</sub> in dated aluminum treated CDCl<sub>3</sub>.

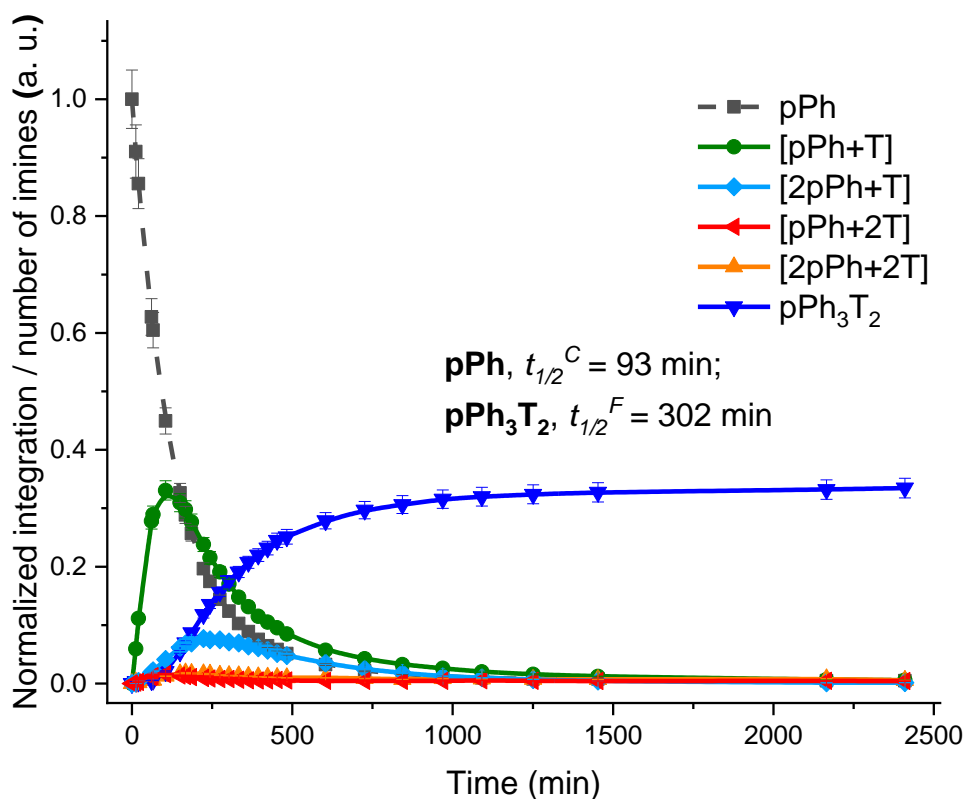

**Fig. S22**  $^1\text{H}$  NMR monitoring of the evolution of the species generated during cage  $\text{pPh}_3\text{T}_2$  formation as a function of time over 2410 min in dated aluminum treated  $\text{CDCl}_3$ . Error in  $^1\text{H}$ -NMR signal integration:  $\pm 5\%$ .

**Assignment of [pPh+2T] and [2pPh+2T] according to reaction  $3\text{pPh} + 4\text{T}$**

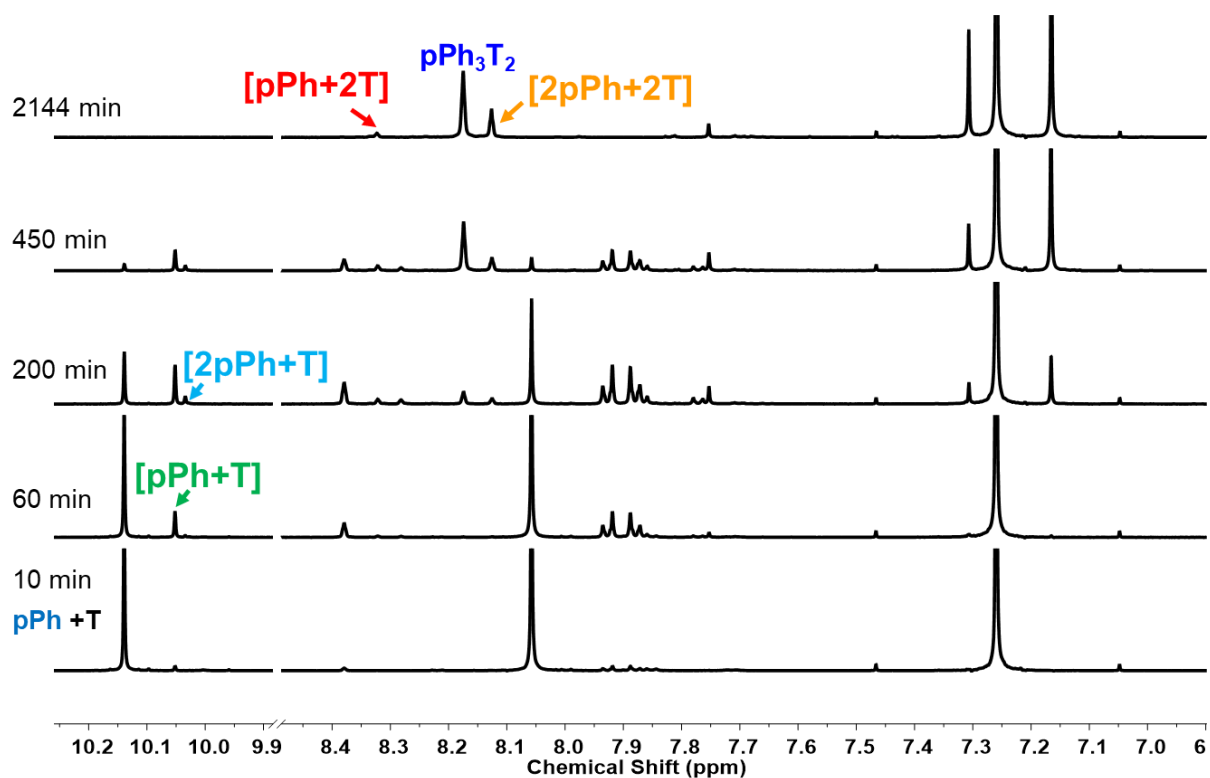

**Fig. S23** Temporal evolution of the  $^1\text{H}$  NMR (500 MHz,  $\text{CDCl}_3$ ,  $25^\circ\text{C}$ ) spectra of  $3\text{pPh} + 4\text{T}$  reaction showing

the formation of several intermediates and of the final macrobicyclic cage **pPh<sub>3</sub>T<sub>2</sub>**

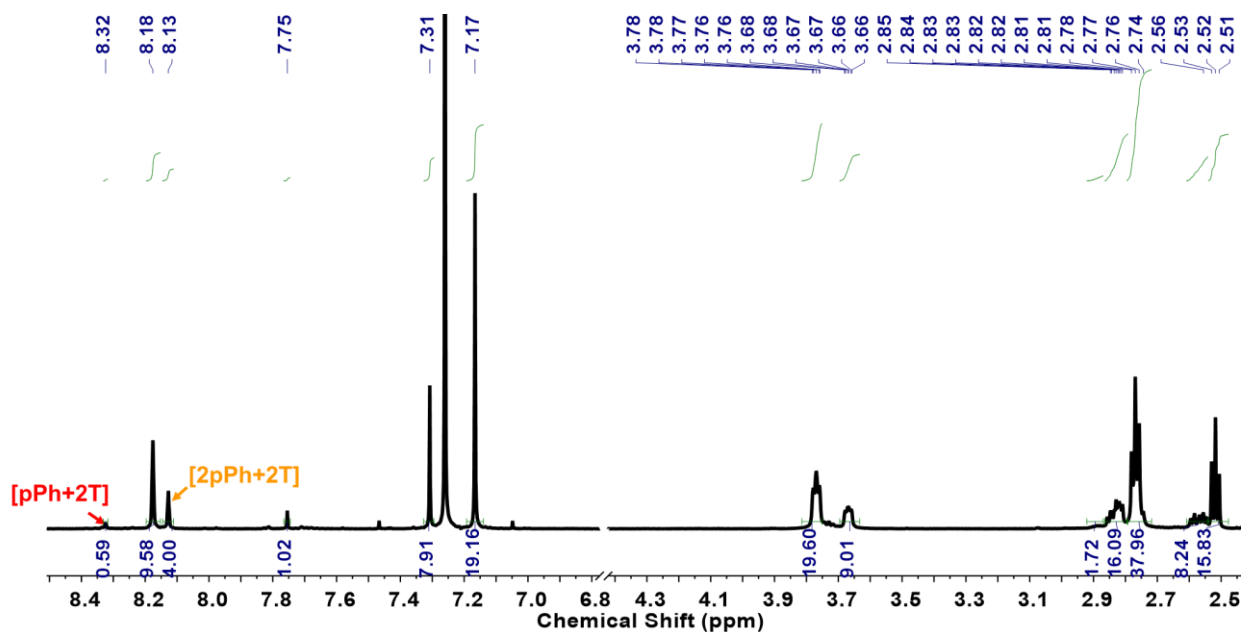

Fig. S24 Equilibrated <sup>1</sup>H NMR (500 MHz, CDCl<sub>3</sub>, 25 °C) spectrum of 3**pPh** + 4**T** reaction after 2144 min.

## 6.2 Time-dependent <sup>1</sup>H NMR of macrobicyclic cage BiPh<sub>3</sub>T<sub>2</sub>

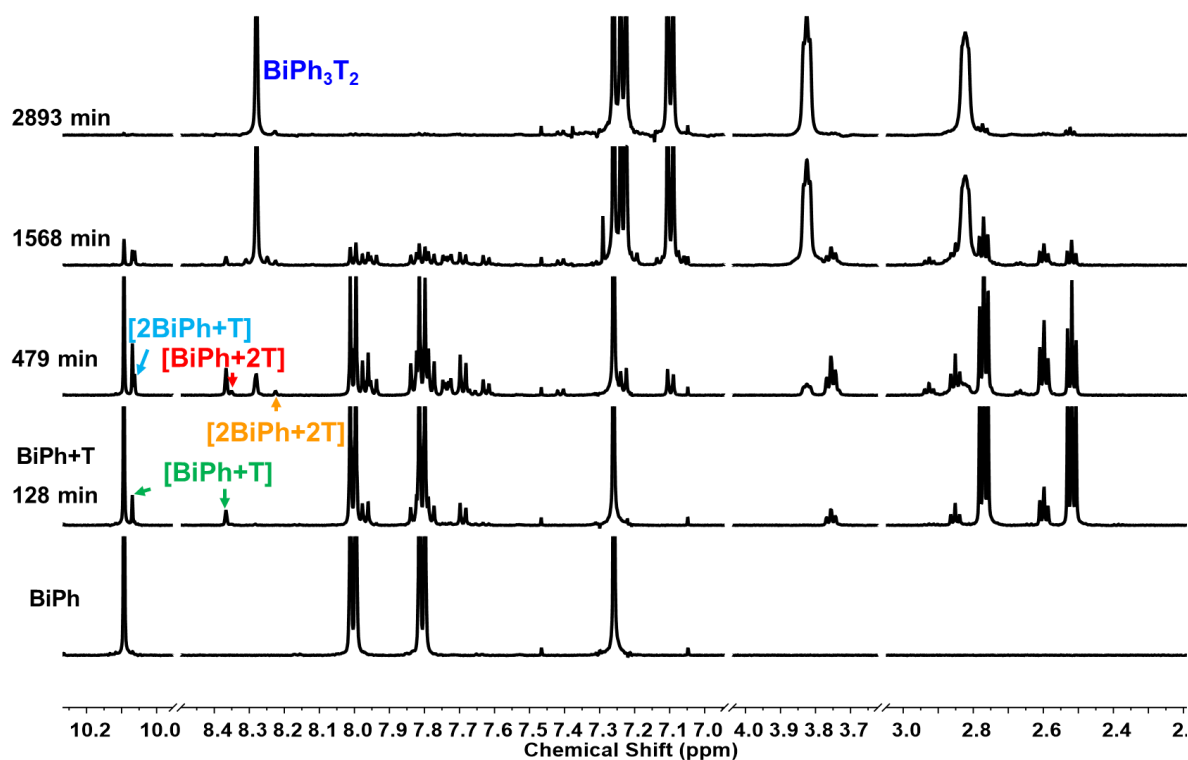

Fig. S25 Temporal evolution of the <sup>1</sup>H NMR spectra (500 MHz, CDCl<sub>3</sub>) of a 3/2 mixture of **BiPh** (3.6 mM) and **T** showing the formation of several intermediates and of the final macrobicyclic cage **BiPh<sub>3</sub>T<sub>2</sub>**.

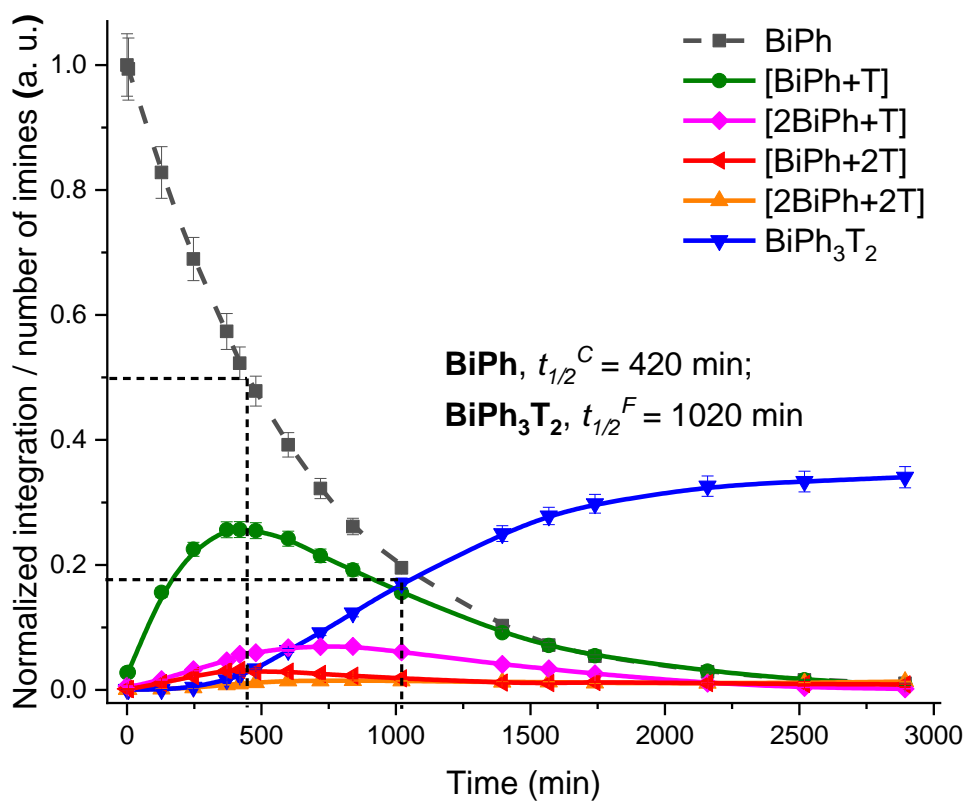

**Fig. S26**  $^1\text{H}$  NMR monitoring of the evolution of cage  $\text{BiPh}_3\text{T}_2$  formation as a function of time over 2893 min. Error in  $^1\text{H}$ -NMR signal integration:  $\pm 5\%$ .

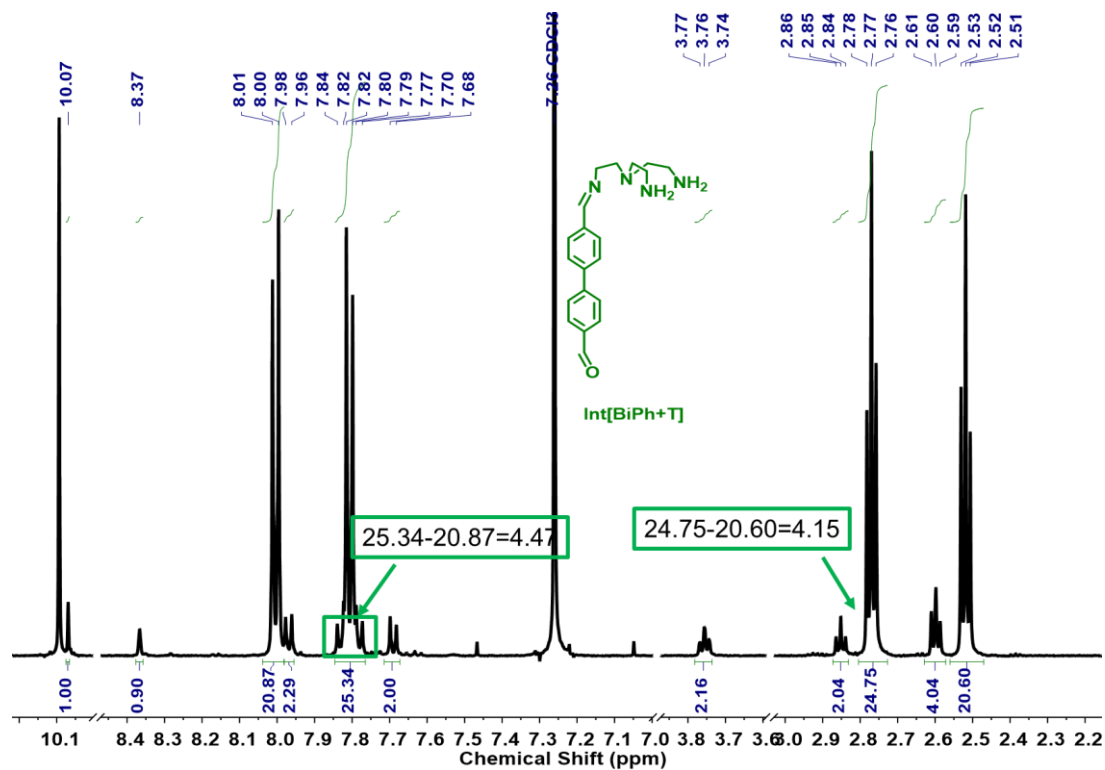

**Fig. S27**  $^1\text{H}$  NMR spectra (500 MHz,  $\text{CDCl}_3$ ) of the intermediate  $[\text{BiPh}+\text{T}]$  after 168 min condensation of  $\text{BiPh}$  (3.6 mM) and  $\text{T}$  (2.4 mM).

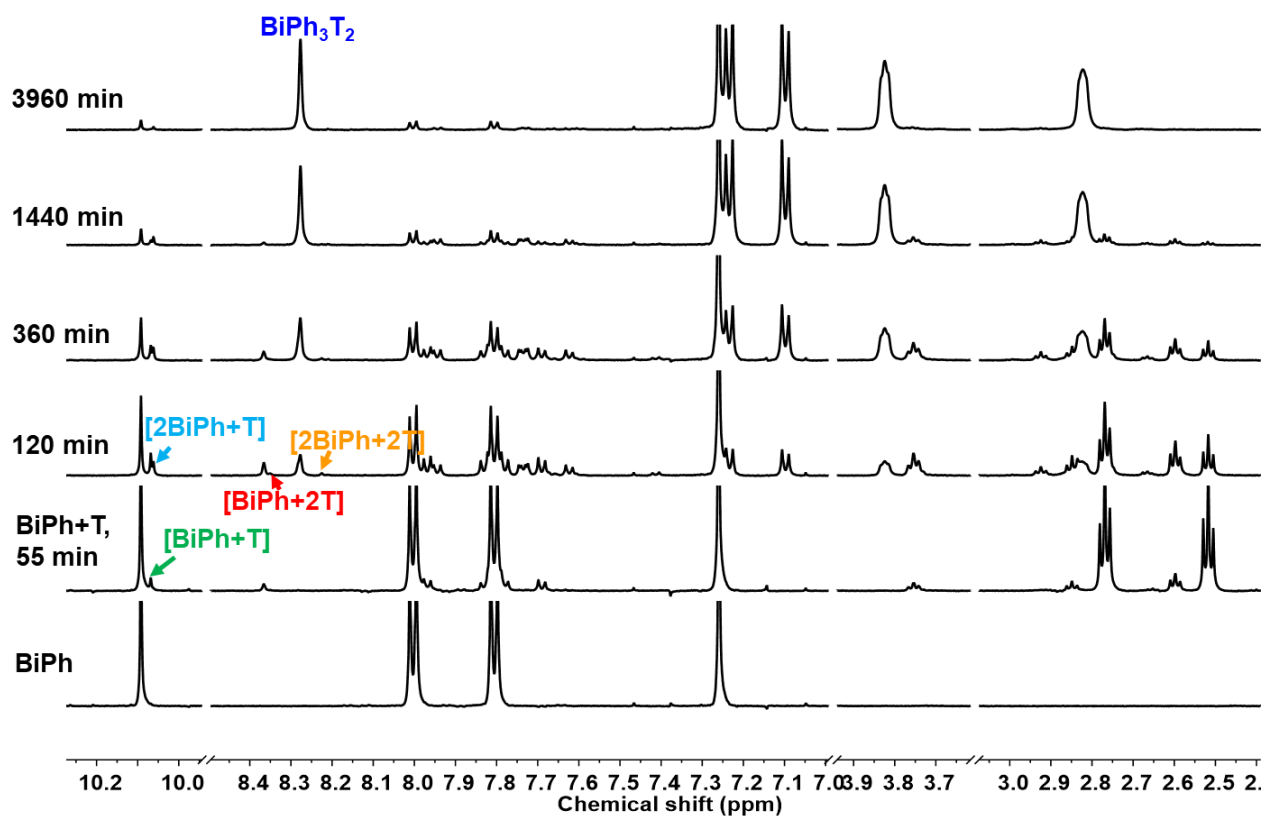

**Fig. S28** Temporal evolution of the  $^1\text{H}$  NMR spectra (500 MHz,  $\text{CDCl}_3$ , 25  $^\circ\text{C}$ ) of a 3/2 mixture of **BiPh** (3.6 mM) and **T** showing the formation of several intermediates and of the final macrobicyclic cage **BiPh<sub>3</sub>T<sub>2</sub>** in dated aluminum treated  $\text{CDCl}_3$ .

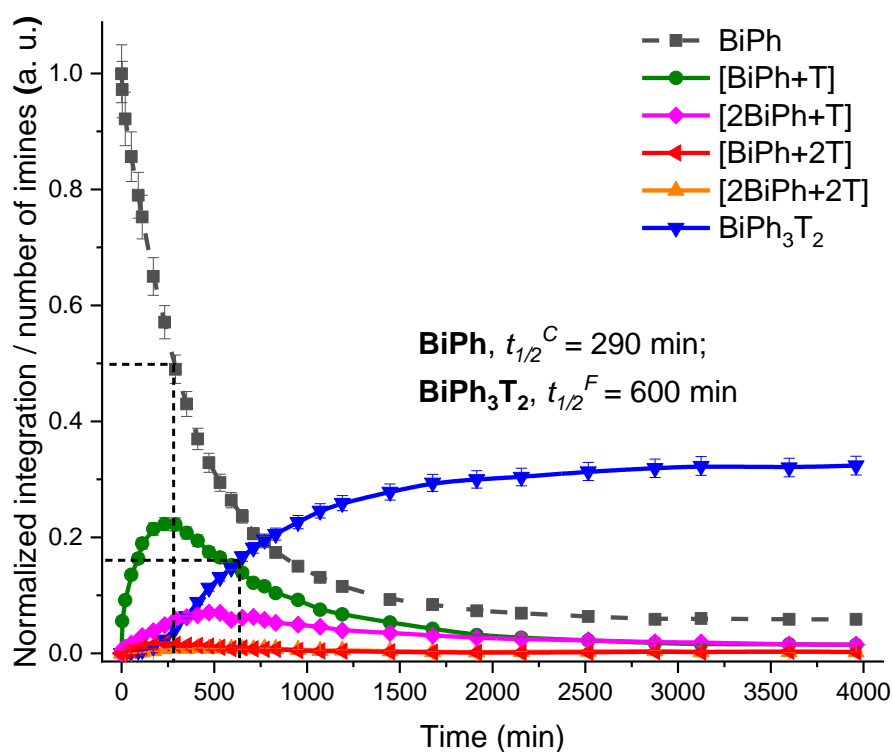

**Fig. S29**  $^1\text{H}$  NMR monitoring of the evolution of cage **BiPh<sub>3</sub>T<sub>2</sub>** formation as a function of time over 3960 min. Error in  $^1\text{H}$ -NMR signal integration:  $\pm 5\%$ .

Assignment of [BiPh+2T] and [2BiPh+2T] according to reaction 3BiPh + 4T

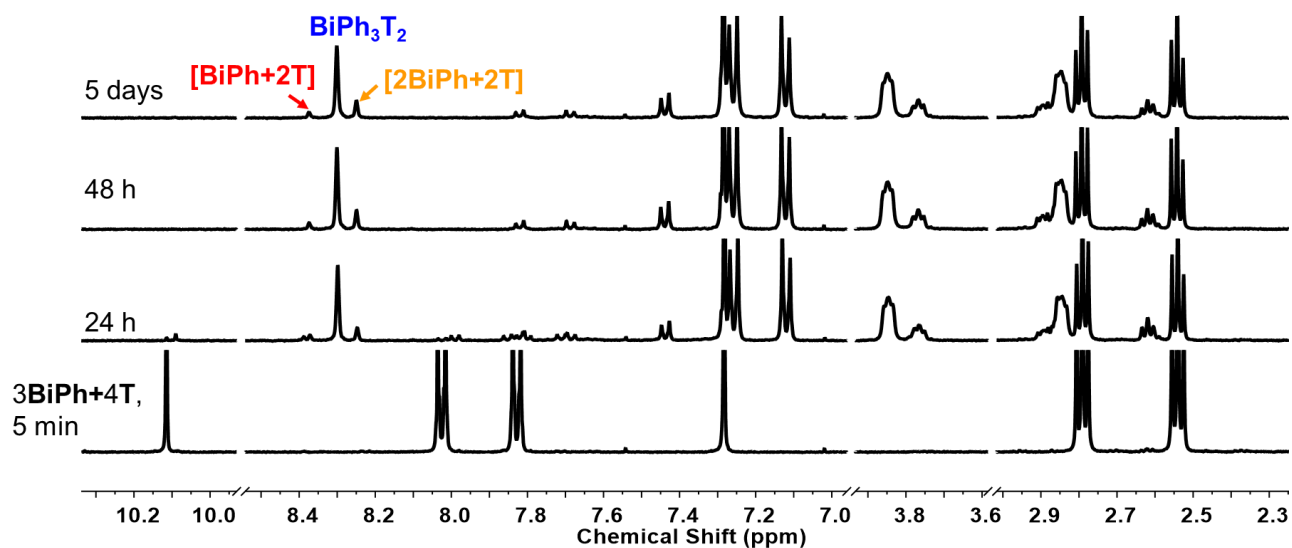

Fig. S30 Temporal evolution of the <sup>1</sup>H NMR (400 MHz, CDCl<sub>3</sub>, 23 °C) spectra of 3BiPh + 4T reaction in dated aluminum treated CDCl<sub>3</sub>.

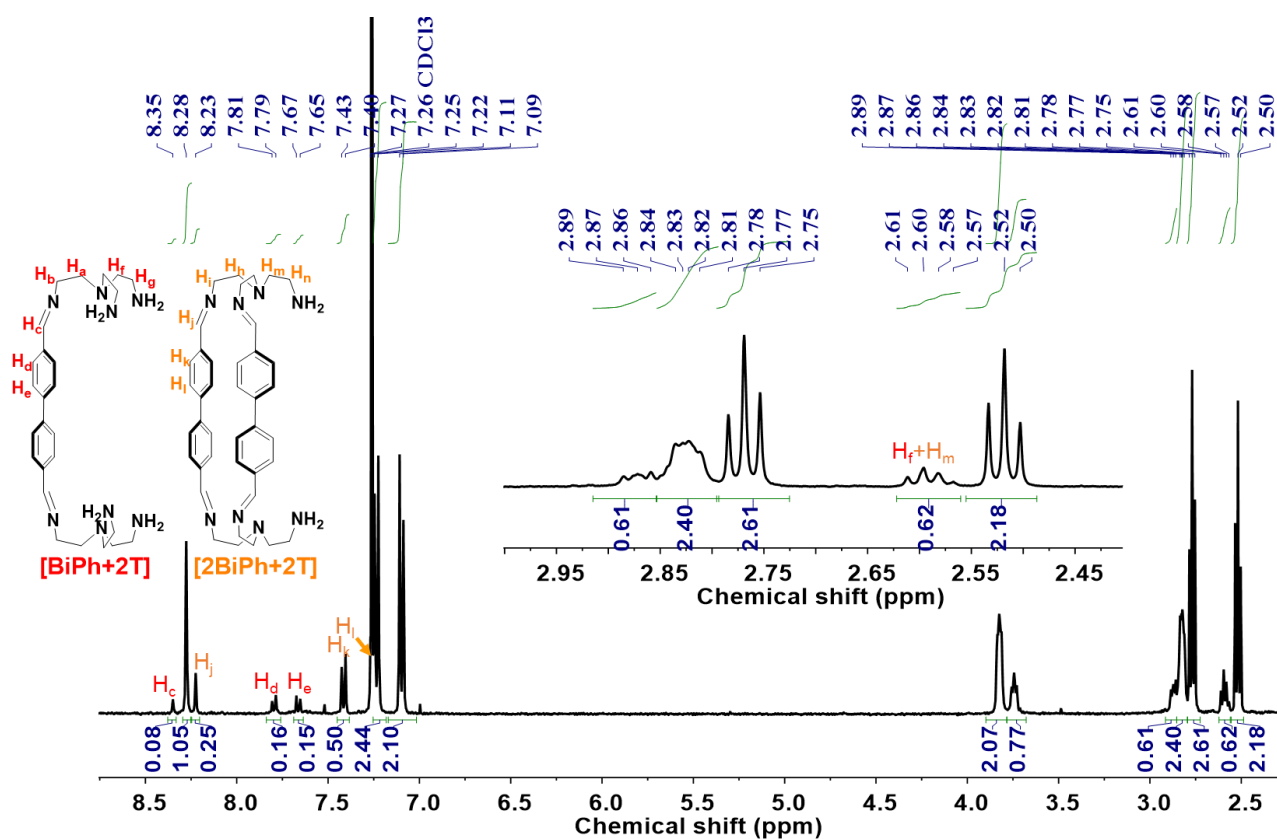

Fig. S31 Equilibrated <sup>1</sup>H NMR (400 MHz, CDCl<sub>3</sub>, 23 °C) spectrum of 3BiPh + 4T reaction at 48 h.

### 6.3 Time-dependent $^1\text{H}$ NMR of macrobicyclic cage $\text{Py}_3\text{T}_2$

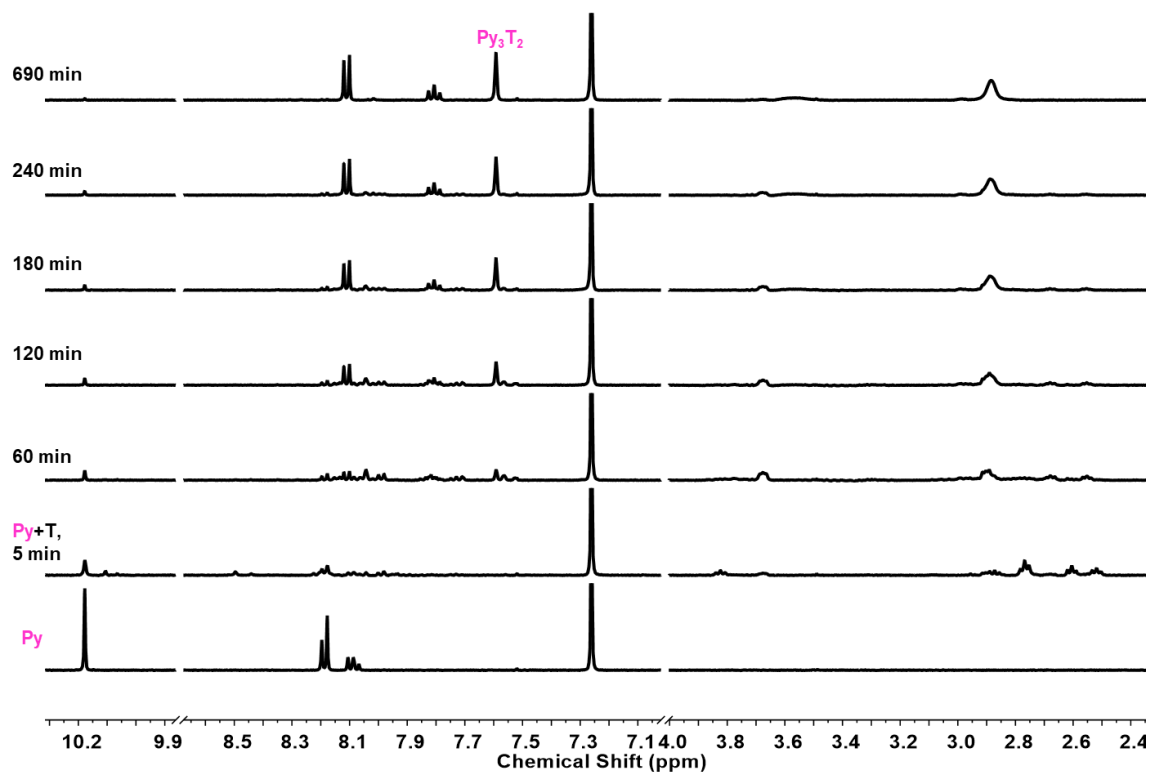

**Fig. S32** Temporal evolution of the  $^1\text{H}$  NMR spectra (400 MHz,  $\text{CDCl}_3$ , 21  $^\circ\text{C}$ ) of a 3/2 mixture of **Py** (3.6 mM) and **T** showing the formation of several intermediates and of the final macrobicyclic cage  $\text{Py}_3\text{T}_2$ .

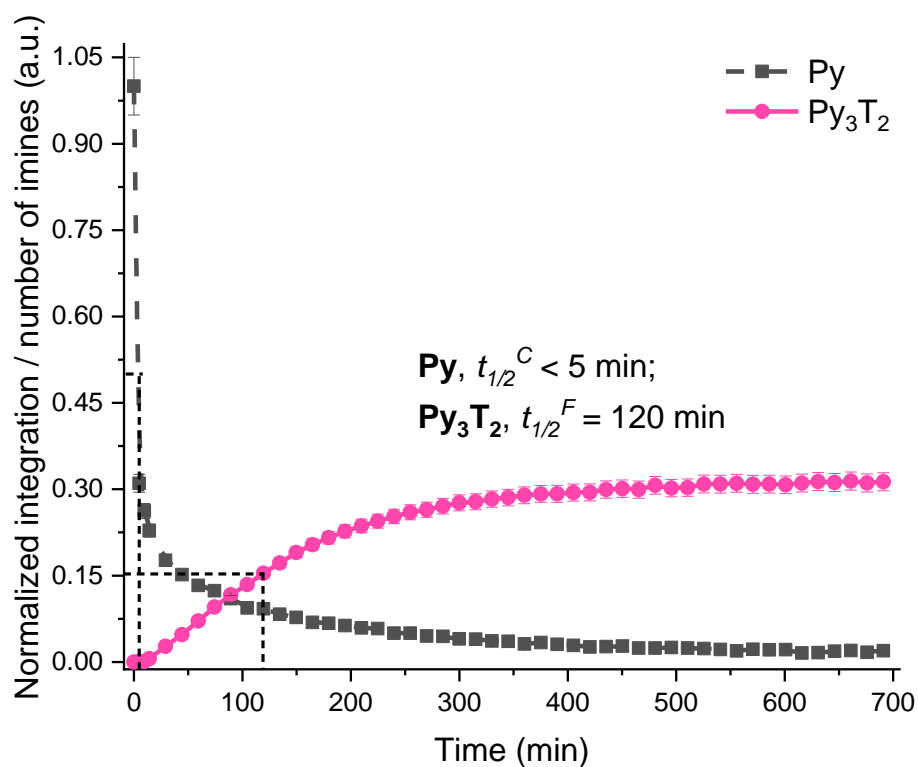

**Fig. S33**  $^1\text{H}$  NMR monitoring of the evolution of cage  $\text{Py}_3\text{T}_2$  formation as a function of time over 690 min. Error in  $^1\text{H}$ -NMR signal integration:  $\pm 5\%$ .



#### 6.4 Competitive experiment of 3Py + 3NON + 2T

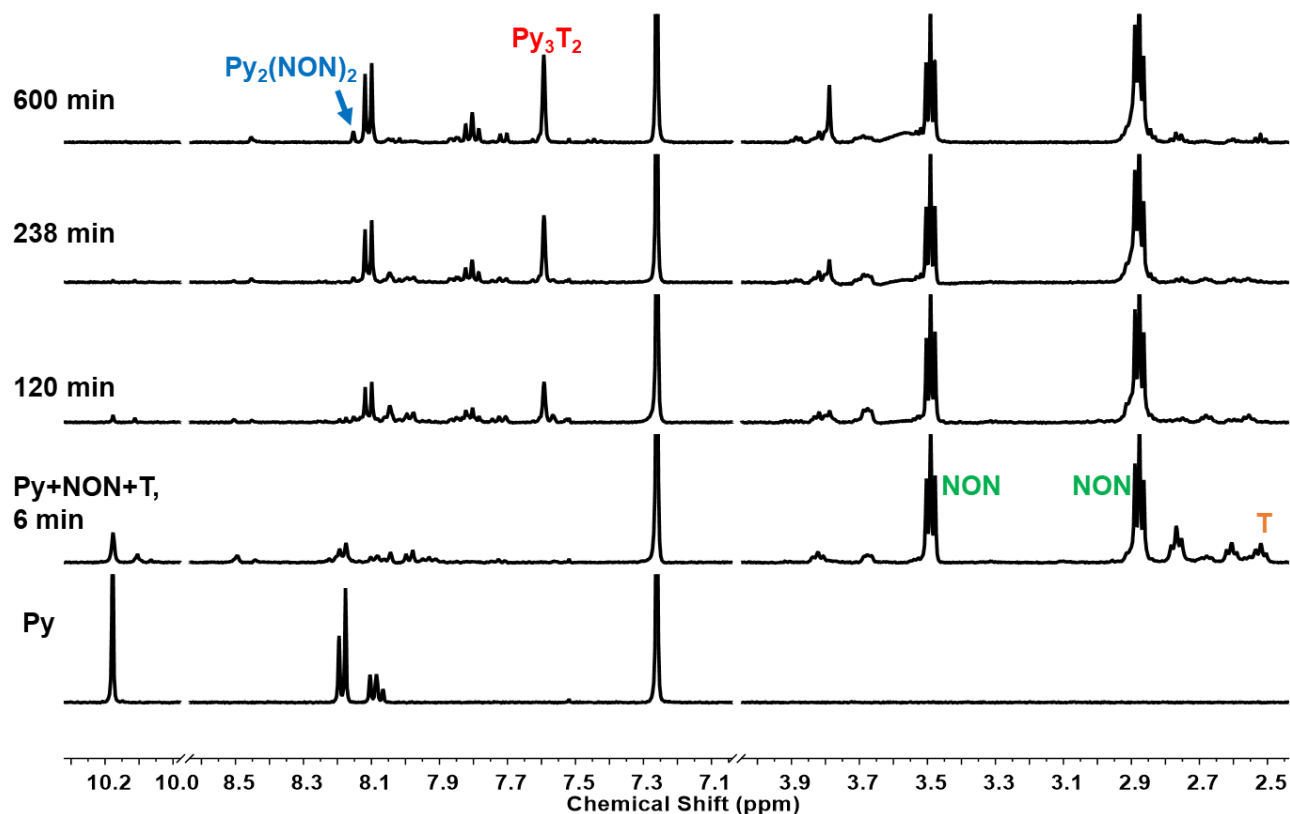

**Fig. S34** Temporal evolution of the <sup>1</sup>H NMR spectra (400 MHz, CDCl<sub>3</sub>, 23 °C) of a mixture of Py (3.6 mM) with NON (3.6 mM) and T (2.4 mM) showing the selective formation of macrobicyclic cage  $\text{Py}_3\text{T}_2$ .

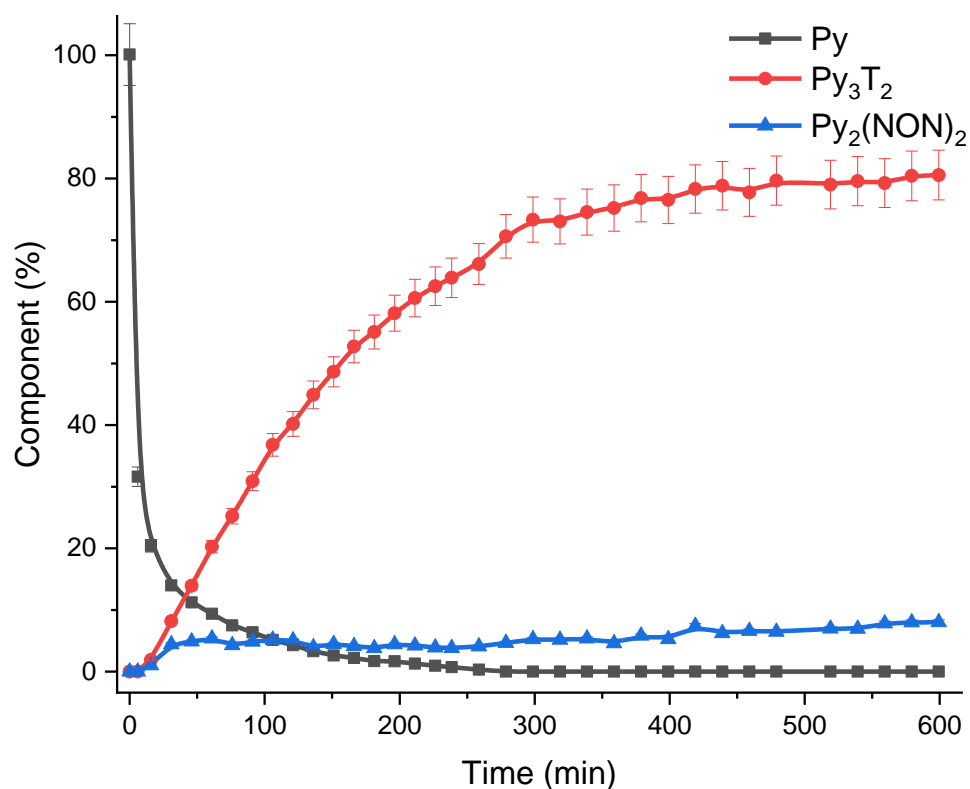

**Fig. S35** <sup>1</sup>H NMR kinetic profile for the selective formation of cage  $\text{Py}_3\text{T}_2$  from the mixture of Py (3.6 mM) with NON (3.6 mM) and T (2.4 mM). Error in <sup>1</sup>H-NMR signal integration:  $\pm 5\%$ .

## 6.5 Time-dependent HRMS of macrobicyclic cage pPh<sub>3</sub>T<sub>2</sub>

**Table S3** HRMS-ESI assignment of the Key Species Identified during the formation process of macrocycle pPh<sub>3</sub>T<sub>2</sub>

| Entry | assignment                                                                 | formula                                                       | Combined ion     | m/z calcd. | m/z found |
|-------|----------------------------------------------------------------------------|---------------------------------------------------------------|------------------|------------|-----------|
| 1     | <b>T</b>                                                                   | C <sub>6</sub> H <sub>18</sub> N <sub>4</sub>                 | +H <sup>+</sup>  | 147.1604   | 147.1595  |
|       |                                                                            |                                                               | +Na <sup>+</sup> | 169.1424   | 169.1413  |
| 2     | [ <b>pPh+T-H<sub>2</sub>O</b> ]                                            | C <sub>14</sub> H <sub>22</sub> N <sub>4</sub> O              | +H <sup>+</sup>  | 263.1866   | 263.1849  |
|       |                                                                            |                                                               | +Na <sup>+</sup> | 285.1686   | 285.1666  |
|       |                                                                            |                                                               | +2H <sup>+</sup> | 132.0970   | N/A       |
| 4     | [ <b>2pPh+T-2H<sub>2</sub>O</b> ]                                          | C <sub>22</sub> H <sub>26</sub> N <sub>4</sub> O <sub>2</sub> | +H <sup>+</sup>  | 379.2129   | 379.2102  |
|       |                                                                            |                                                               | +Na <sup>+</sup> | 401.1948   | 401.1921  |
|       |                                                                            |                                                               | +2H <sup>+</sup> | 190.1101   | N/A       |
| 5     | [ <b>3pPh+T-3H<sub>2</sub>O</b> ]                                          | C <sub>30</sub> H <sub>30</sub> N <sub>4</sub> O <sub>3</sub> | +H <sup>+</sup>  | 495.2391   | 495.2358  |
|       |                                                                            |                                                               | +Na <sup>+</sup> | 517.2210   | 517.2171  |
|       |                                                                            |                                                               | +2H <sup>+</sup> | 248.1232   | N/A       |
| 3     | [ <b>pPh+2T-2H<sub>2</sub>O</b> ]                                          | C <sub>20</sub> H <sub>38</sub> N <sub>8</sub>                | +H <sup>+</sup>  | 391.3292   | 391.3265  |
|       |                                                                            |                                                               | +Na <sup>+</sup> | 413.3112   | 413.3083  |
|       |                                                                            |                                                               | +2H <sup>+</sup> | 196.1682   | 196.1670  |
| 6     | [ <b>2pPh+2T-3H<sub>2</sub>O</b> ]                                         | C <sub>28</sub> H <sub>42</sub> N <sub>8</sub> O              | +H <sup>+</sup>  | 507.3554   | N/A       |
|       |                                                                            |                                                               | +Na <sup>+</sup> | 529.3374   | N/A       |
|       |                                                                            |                                                               | +2H <sup>+</sup> | 254.1814   | N/A       |
| 7     | [ <b>2pPh+2T-4H<sub>2</sub>O</b> ]                                         | C <sub>28</sub> H <sub>40</sub> N <sub>8</sub>                | +H <sup>+</sup>  | 489.3449   | 489.3415  |
|       |                                                                            |                                                               | +Na <sup>+</sup> | 511.3268   | 511.3236  |
|       |                                                                            |                                                               | +2H <sup>+</sup> | 245.1761   | 245.1744  |
| 8     | [ <b>3pPh+2T-4H<sub>2</sub>O</b> ]                                         | C <sub>36</sub> H <sub>46</sub> N <sub>8</sub> O <sub>2</sub> | +H <sup>+</sup>  | 623.3816   | N/A       |
|       |                                                                            |                                                               | +Na <sup>+</sup> | 645.3636   | N/A       |
|       |                                                                            |                                                               | +2H <sup>+</sup> | 312.1945   | N/A       |
| 9     | [ <b>3pPh+2T-5H<sub>2</sub>O</b> ]                                         | C <sub>36</sub> H <sub>44</sub> N <sub>8</sub> O              | +H <sup>+</sup>  | 605.3711   | 605.3671  |
|       |                                                                            |                                                               | +Na <sup>+</sup> | 627.3491   | 627.3530  |
|       |                                                                            |                                                               | +2H <sup>+</sup> | 303.1892   | 303.1869  |
| 10    | [ <b>3pPh+2T-6H<sub>2</sub>O</b> ]<br>Cage pPh <sub>3</sub> T <sub>2</sub> | C <sub>36</sub> H <sub>42</sub> N <sub>8</sub>                | +H <sup>+</sup>  | 587.3605   | 587.3568  |
|       |                                                                            |                                                               | +Na <sup>+</sup> | 609.3425   | 609.3388  |
|       |                                                                            |                                                               | +2H <sup>+</sup> | 294.1839   | 294.1820  |

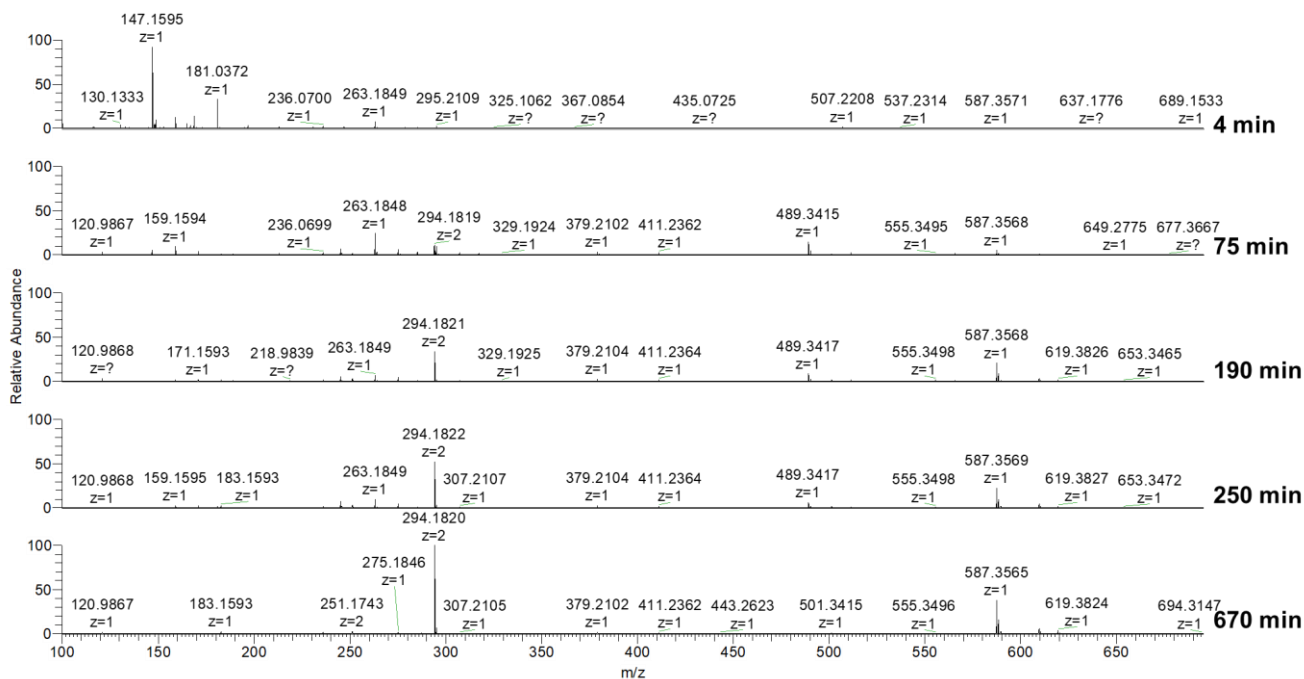

**Fig. S36** Temporal evolution of the HRMS-ESI spectra of the 3/2 mixture of pPh (2 mM) and T in 50%-50% CHCl<sub>3</sub>/MeOH.

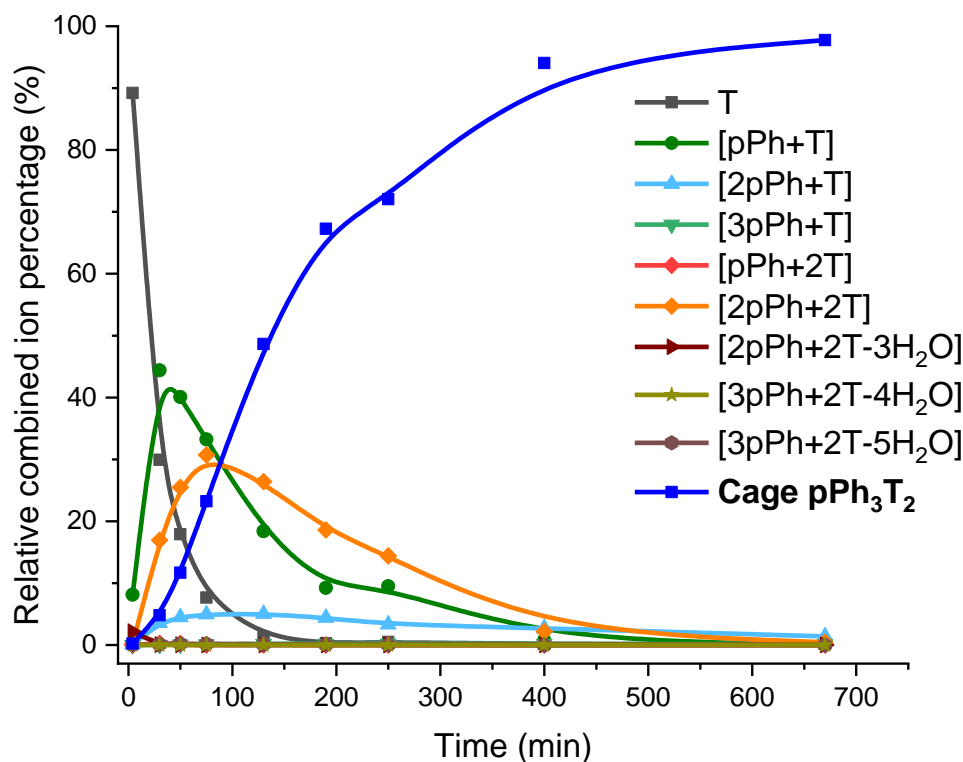

**Fig. S37** HRMS-ESI kinetic evolution of the species generated during the formation of the macrobicyclic cage pPh<sub>3</sub>T<sub>2</sub> from pPh (2 mM) and T (50%-50% CHCl<sub>3</sub>/MeOH, r.t.) as a function of time over 670 min. NB: The relative combined ion percentage is obtained by the ratio of combined ion count of each species to the sum of combined ion counts for all species at each time point. These data do not provide quantitative information about the relative amounts of each species identified by its mass, but, taken separately, they display the evolution of a given identified species during the course of the reaction. The curves are added to guide the eye.

## 6.6 Time-dependent HRMS of macrobicyclic cage BiPh<sub>3</sub>T<sub>2</sub>

**Table S4** HRMS-ESI assignment of the Key Species Identified during the formation process of macrocycle BiPh<sub>3</sub>T<sub>2</sub>

| Entry | assignment                                                                                  | formula                                                       | Combined ion     | m/z calcd. | m/z found |
|-------|---------------------------------------------------------------------------------------------|---------------------------------------------------------------|------------------|------------|-----------|
| 1     | <b>T</b>                                                                                    | C <sub>6</sub> H <sub>18</sub> N <sub>4</sub>                 | +H <sup>+</sup>  | 147.1604   | 147.1595  |
|       |                                                                                             |                                                               | +Na <sup>+</sup> | 169.1424   | 169.1413  |
| 2     | [ <b>BiPh</b> + <b>T</b> -H <sub>2</sub> O]                                                 | C <sub>20</sub> H <sub>26</sub> N <sub>4</sub> O              | +H <sup>+</sup>  | 339.2179   | 339.2156  |
|       |                                                                                             |                                                               | +Na <sup>+</sup> | 361.1999   | 361.1974  |
|       |                                                                                             |                                                               | +2H <sup>+</sup> | 170.1126   | N/A       |
| 4     | [ <b>2BiPh</b> + <b>T</b> -2H <sub>2</sub> O]                                               | C <sub>34</sub> H <sub>34</sub> N <sub>4</sub> O <sub>2</sub> | +H <sup>+</sup>  | 531.2755   | 531.2720  |
|       |                                                                                             |                                                               | +Na <sup>+</sup> | 553.2574   | 553.2539  |
|       |                                                                                             |                                                               | +2H <sup>+</sup> | 266.1414   | 266.1407  |
| 5     | [ <b>3BiPh</b> + <b>T</b> -3H <sub>2</sub> O]                                               | C <sub>48</sub> H <sub>42</sub> N <sub>4</sub> O <sub>3</sub> | +H <sup>+</sup>  | 723.3330   | 723.3275  |
|       |                                                                                             |                                                               | +Na <sup>+</sup> | 745.3149   | 745.3104  |
|       |                                                                                             |                                                               | +2H <sup>+</sup> | 362.1701   | N/A       |
| 3     | [ <b>BiPh</b> + <b>2T</b> -2H <sub>2</sub> O]                                               | C <sub>26</sub> H <sub>42</sub> N <sub>8</sub>                | +H <sup>+</sup>  | 467.3605   | N/A       |
|       |                                                                                             |                                                               | +Na <sup>+</sup> | 489.3425   | 489.3366  |
|       |                                                                                             |                                                               | +2H <sup>+</sup> | 234.1839   | 234.1824  |
| 6     | [ <b>2BiPh</b> + <b>2T</b> -3H <sub>2</sub> O]                                              | C <sub>40</sub> H <sub>50</sub> N <sub>8</sub> O              | +H <sup>+</sup>  | 659.4180   | N/A       |
|       |                                                                                             |                                                               | +Na <sup>+</sup> | 681.4000   | N/A       |
|       |                                                                                             |                                                               | +2H <sup>+</sup> | 330.2127   | N/A       |
| 7     | [ <b>2BiPh</b> + <b>2T</b> -4H <sub>2</sub> O]                                              | C <sub>40</sub> H <sub>48</sub> N <sub>8</sub>                | +H <sup>+</sup>  | 641.4075   | 641.4027  |
|       |                                                                                             |                                                               | +Na <sup>+</sup> | 663.3844   | 663.3894  |
|       |                                                                                             |                                                               | +2H <sup>+</sup> | 321.2052   | 321.2074  |
| 8     | [ <b>3BiPh</b> + <b>2T</b> -4H <sub>2</sub> O]                                              | C <sub>54</sub> H <sub>58</sub> N <sub>8</sub> O <sub>2</sub> | +H <sup>+</sup>  | 851.4755   | N/A       |
|       |                                                                                             |                                                               | +Na <sup>+</sup> | 873.4575   | N/A       |
|       |                                                                                             |                                                               | +2H <sup>+</sup> | 426.2414   | N/A       |
| 9     | [ <b>3BiPh</b> + <b>2T</b> -5H <sub>2</sub> O]                                              | C <sub>54</sub> H <sub>56</sub> N <sub>8</sub> O              | +H <sup>+</sup>  | 833.4650   | 833.4509  |
|       |                                                                                             |                                                               | +Na <sup>+</sup> | 855.4469   | 855.4075  |
|       |                                                                                             |                                                               | +2H <sup>+</sup> | 417.2361   | 517.2229  |
| 10    | [ <b>3BiPh</b> + <b>2T</b> -6H <sub>2</sub> O]<br>Cage <b>BiPh<sub>3</sub>T<sub>2</sub></b> | C <sub>54</sub> H <sub>54</sub> N <sub>8</sub>                | +H <sup>+</sup>  | 815.4544   | 815.4484  |
|       |                                                                                             |                                                               | +Na <sup>+</sup> | 837.4364   | 837.4302  |
|       |                                                                                             |                                                               | +2H <sup>+</sup> | 408.2308   | 408.2283  |

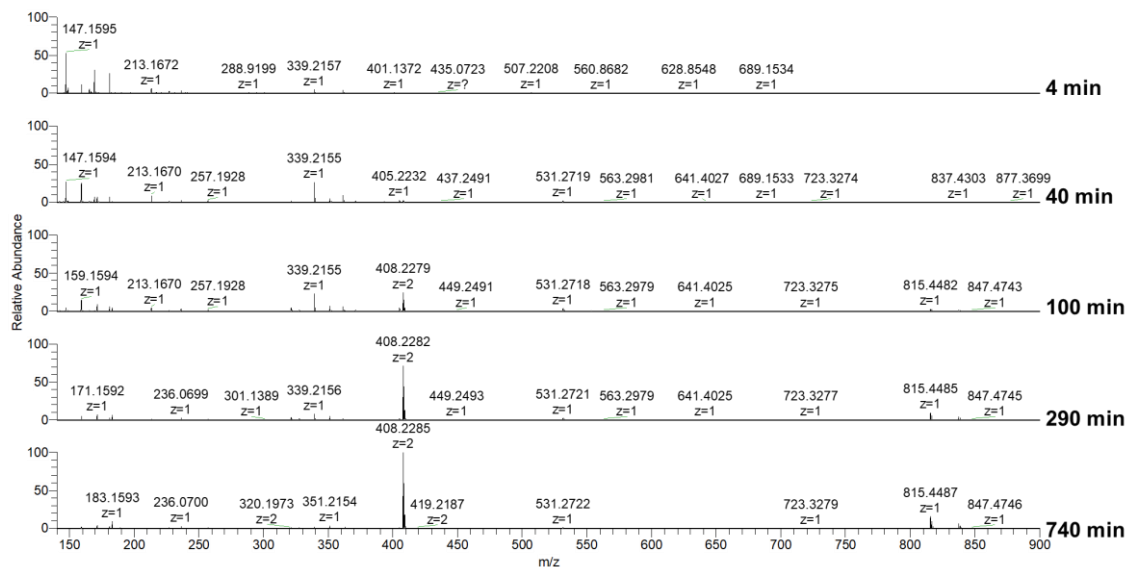

**Fig. S38** Temporal evolution of the HRMS-ESI spectra of the 3/2 mixture of **BiPh** (2 mM) and **T** in 50%-50%  $\text{CHCl}_3/\text{MeOH}$ .

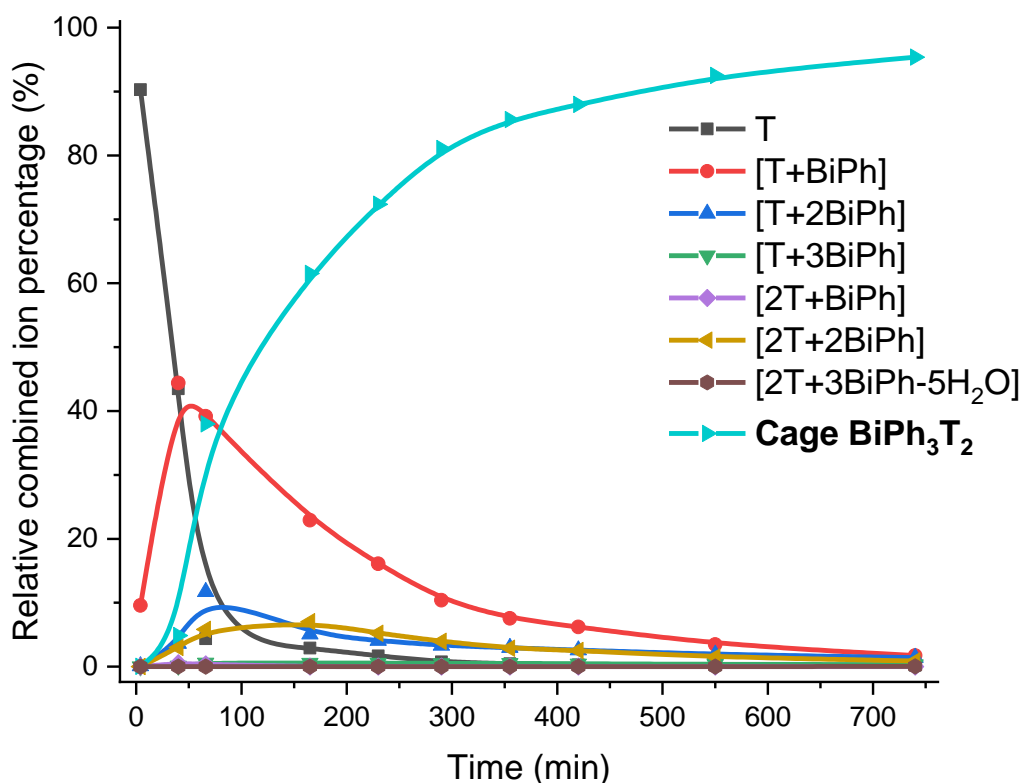

**Fig. S39** HRMS-ESI kinetic evolution of the species generated during the formation of the macrocycle **BiPh<sub>3</sub>T<sub>2</sub>** from **BiPh** (2 mM) and **T** (50%-50%  $\text{CHCl}_3/\text{MeOH}$ , r.t.) as a function of time over 740 min. NB: The relative combined ion percentage is obtained by the ratio of combined ion count of each species to the sum of combined ion counts for all species at each time point. These data do not provide quantitative information about the relative amounts of each species identified by its mass, but, taken separately, they display the evolution of a given identified species during the course of the reaction. The curves are added to guide the eye.

## 7. Self-sorting experiments

### 7.1 Self-sorting experiment 2pPh + 2BiPh + 4NON

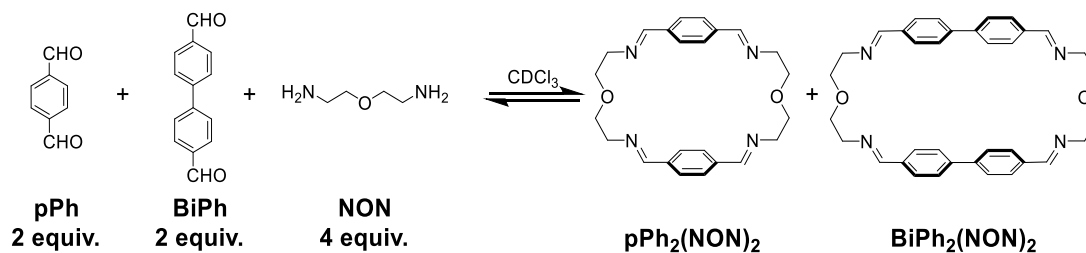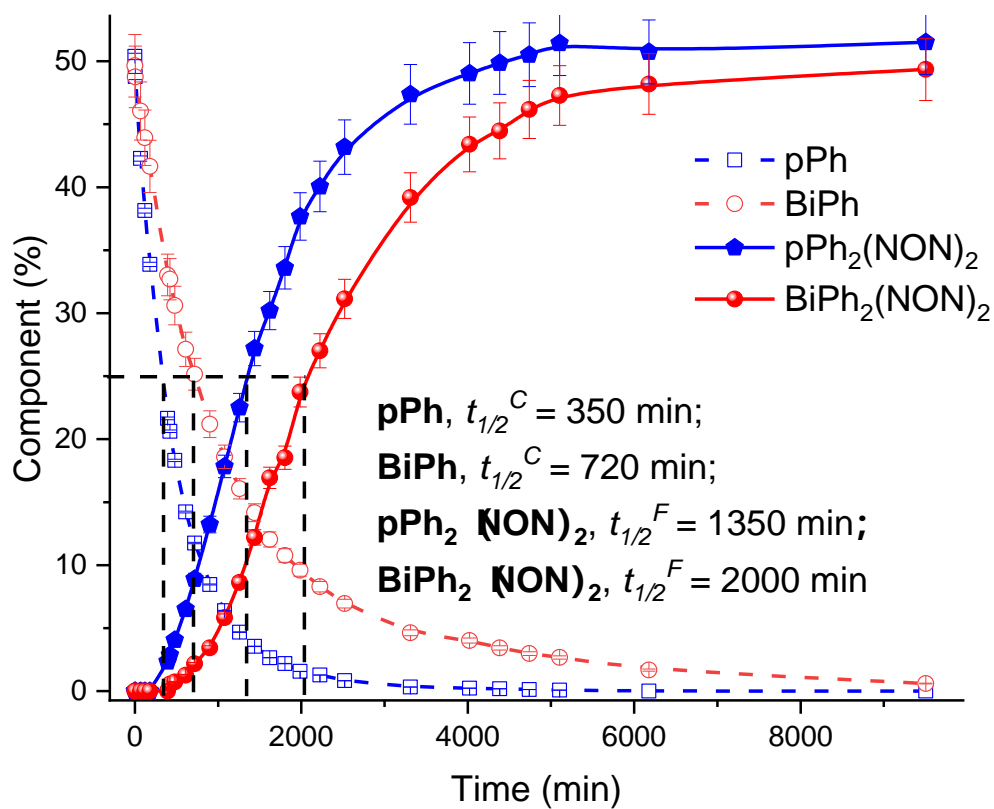

**Fig. S40** <sup>1</sup>H NMR monitoring during the self-sorting of macrocycle **pPh<sub>2</sub>(NON)<sub>2</sub>** and **BiPh<sub>2</sub>(NON)<sub>2</sub>** with fresh aluminum treated CDCl<sub>3</sub>. Error in <sup>1</sup>H-NMR signal integration: ±5%.

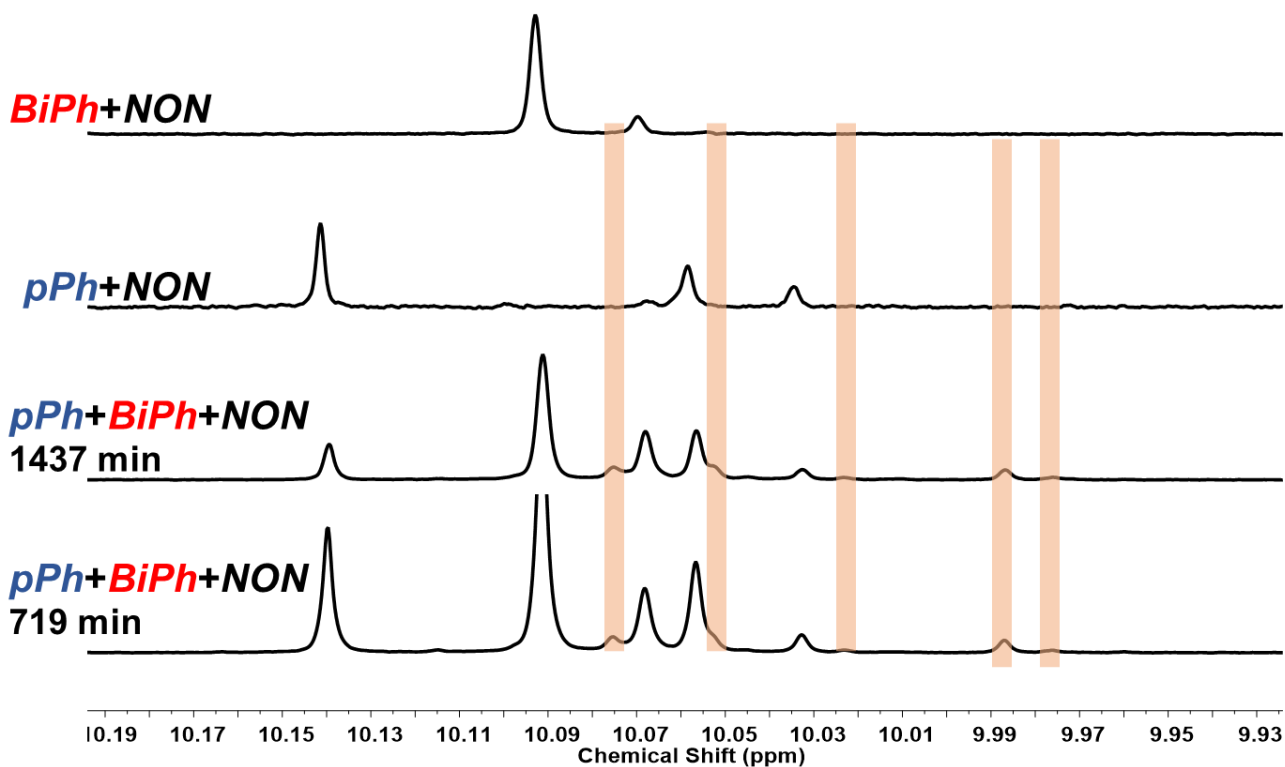

Fig. S41  $^1\text{H}$  NMR spectra comparison of **pPh/BiPh/NON** self-sorting reaction with **pPh/NON** and **BiPh/NON** separated reactions. The top two traces correspond to the **pPh/NON** reaction at 2880 min and **BiPh/NON** reaction at 4384 min.

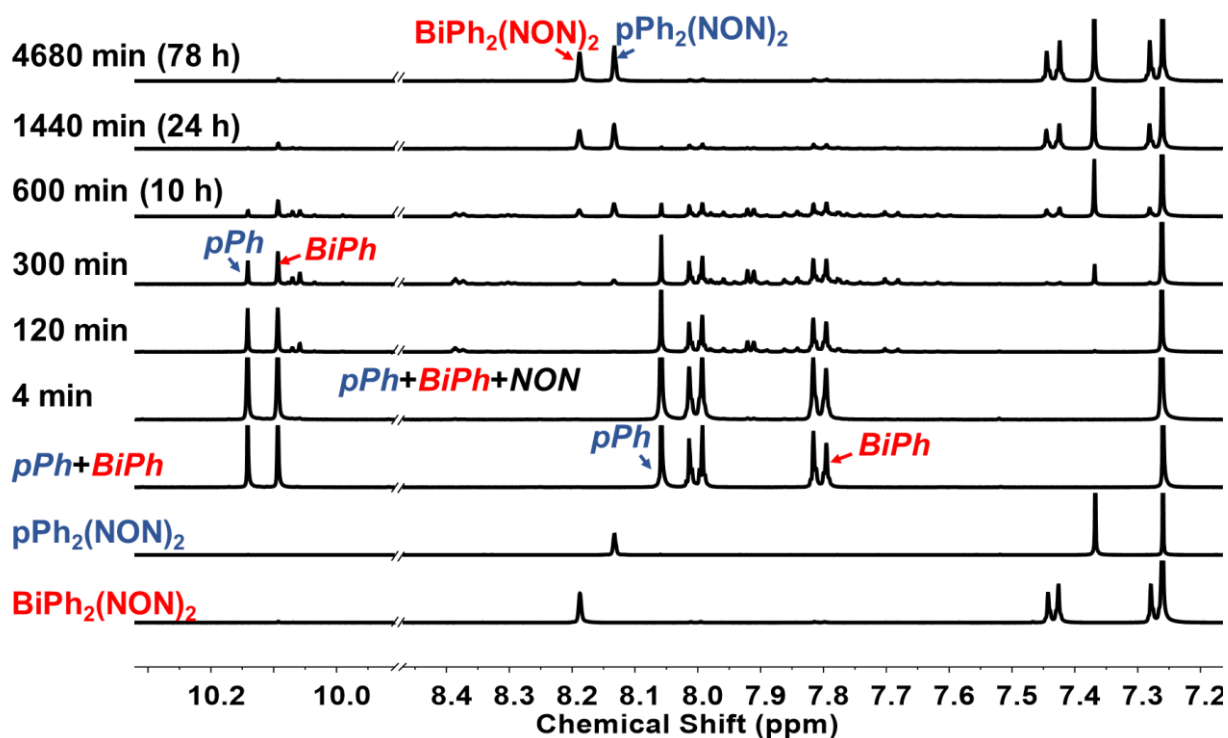

Fig. S42 Temporal evolution of the  $^1\text{H}$  NMR spectra (400 MHz,  $\text{CDCl}_3$ , 23  $^\circ\text{C}$ ) during the self-sorting of macrocycle **pPh<sub>2</sub>(NON)<sub>2</sub>** and **BiPh<sub>2</sub>(NON)<sub>2</sub>** in dated aluminum treated  $\text{CDCl}_3$ .

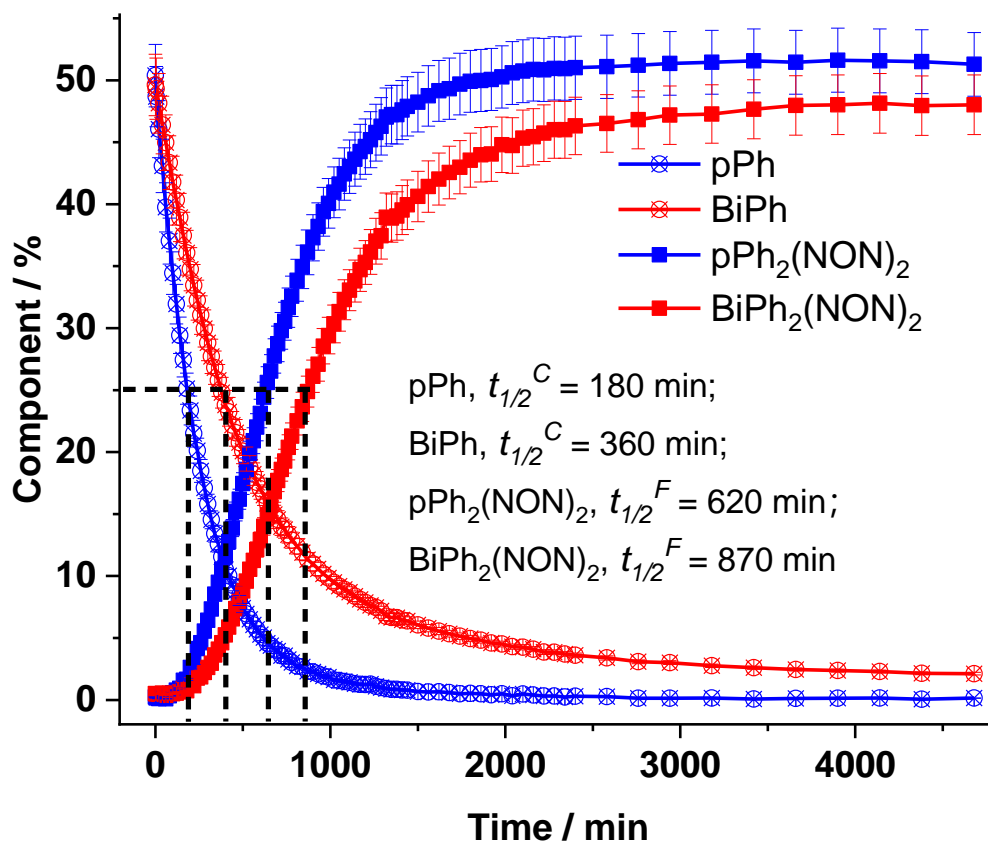

**Fig. S43** <sup>1</sup>H NMR monitoring during the self-sorting of macrocycle **pPh<sub>2</sub>(NON)<sub>2</sub>** and **BiPh<sub>2</sub>(NON)<sub>2</sub>** in dated aluminum treated CDCl<sub>3</sub>. Error in <sup>1</sup>H-NMR signal integration: ±5%.

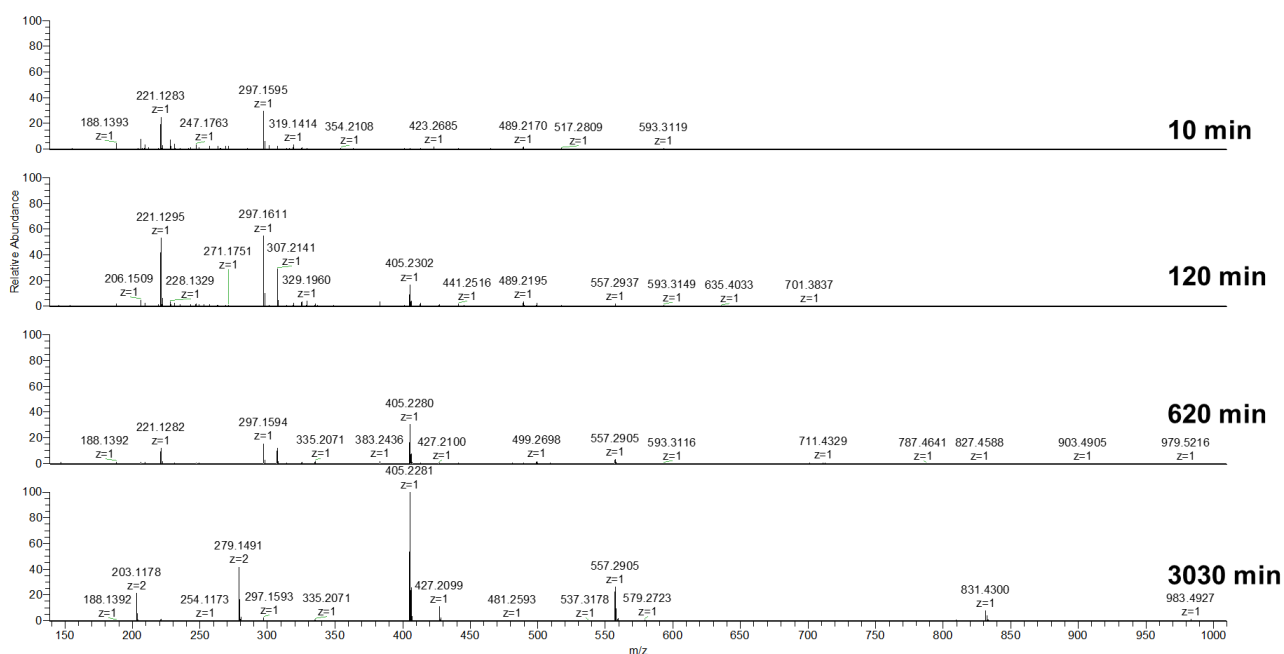

**Fig. S44** Temporal evolution of HRMS-ESI spectra of the 2/2/4 mixture of **pPh** (2 mM), **BiPh** (2 mM) and **NON** in 50%-50% CHCl<sub>3</sub>/MeOH.



**Table S5** HRMS-ESI assignments of the Key Species Identified during the self-sorting reaction of **2pPh + 2BiPh + 4NON**

| Entry | assignment                                                                                               | formula                                                       | Combined ion     | m/z calcd. | m/z found |
|-------|----------------------------------------------------------------------------------------------------------|---------------------------------------------------------------|------------------|------------|-----------|
| 1     | [ <b>pPh</b> + <b>NON</b> -H <sub>2</sub> O]                                                             | C <sub>12</sub> H <sub>16</sub> N <sub>2</sub> O <sub>2</sub> | +H <sup>+</sup>  | 221.1285   | 221.1283  |
|       |                                                                                                          |                                                               | +Na <sup>+</sup> | 243.1104   | 243.1103  |
| 2     | [ <b>pPh</b> +2 <b>NON</b> -2H <sub>2</sub> O]                                                           | C <sub>16</sub> H <sub>26</sub> N <sub>4</sub> O <sub>2</sub> | +H <sup>+</sup>  | 307.2129   | 307.2125  |
|       |                                                                                                          |                                                               | +Na <sup>+</sup> | 329.1948   | 329.1967  |
|       |                                                                                                          |                                                               | +2H <sup>+</sup> | 154.1101   | 154.1100  |
| 3     | [2 <b>pPh</b> + <b>NON</b> -2H <sub>2</sub> O]                                                           | C <sub>20</sub> H <sub>20</sub> N <sub>2</sub> O <sub>3</sub> | +H <sup>+</sup>  | 337.1547   | 337.1542  |
|       |                                                                                                          |                                                               | +Na <sup>+</sup> | 359.1372   | 359.1362  |
|       |                                                                                                          |                                                               | +2H <sup>+</sup> | 169.0810   | N/A       |
| 4     | [2 <b>pPh</b> +2 <b>NON</b> -3H <sub>2</sub> O]                                                          | C <sub>24</sub> H <sub>30</sub> N <sub>4</sub> O <sub>3</sub> | +H <sup>+</sup>  | 423.2391   | 423.2386  |
|       |                                                                                                          |                                                               | +Na <sup>+</sup> | 445.2210   | 445.2118  |
|       |                                                                                                          |                                                               | +2H <sup>+</sup> | 212.1232   | 212.1392  |
| 5     | [2 <b>pPh</b> +2 <b>NON</b> -4H <sub>2</sub> O]<br><b>pPh</b> <sub>2</sub> ( <b>NON</b> ) <sub>2</sub>   | C <sub>24</sub> H <sub>28</sub> N <sub>4</sub> O <sub>2</sub> | +H <sup>+</sup>  | 405.2285   | 405.2279  |
|       |                                                                                                          |                                                               | +Na <sup>+</sup> | 427.2104   | 427.2099  |
|       |                                                                                                          |                                                               | +2H <sup>+</sup> | 203.1179   | 203.1176  |
| 6     | [ <b>BiPh</b> + <b>NON</b> -H <sub>2</sub> O]                                                            | C <sub>18</sub> H <sub>20</sub> N <sub>2</sub> O <sub>2</sub> | +H <sup>+</sup>  | 297.1598   | 297.1593  |
|       |                                                                                                          |                                                               | +Na <sup>+</sup> | 319.1417   | 319.1410  |
|       |                                                                                                          |                                                               | +2H <sup>+</sup> | 149.0835   | 149.0834  |
| 7     | [ <b>BiPh</b> +2 <b>NON</b> -2H <sub>2</sub> O]                                                          | C <sub>22</sub> H <sub>30</sub> N <sub>4</sub> O <sub>2</sub> | +H <sup>+</sup>  | 383.2442   | N/A       |
|       |                                                                                                          |                                                               | +Na <sup>+</sup> | 405.2261   | 405.2281  |
|       |                                                                                                          |                                                               | +2H <sup>+</sup> | 192.1257   | 192.1254  |
| 8     | [2 <b>BiPh</b> + <b>NON</b> -2H <sub>2</sub> O]                                                          | C <sub>32</sub> H <sub>28</sub> N <sub>2</sub> O <sub>3</sub> | +H <sup>+</sup>  | 489.2173   | 489.2166  |
|       |                                                                                                          |                                                               | +Na <sup>+</sup> | 511.1992   | 511.2074  |
|       |                                                                                                          |                                                               | +2H <sup>+</sup> | 245.1123   | N/A       |
| 9     | [2 <b>BiPh</b> +2 <b>NON</b> -3H <sub>2</sub> O]                                                         | C <sub>36</sub> H <sub>38</sub> N <sub>4</sub> O <sub>3</sub> | +H <sup>+</sup>  | 575.3017   | N/A       |
|       |                                                                                                          |                                                               | +Na <sup>+</sup> | 597.2836   | N/A       |
|       |                                                                                                          |                                                               | +2H <sup>+</sup> | 288.1545   | N/A       |
| 10    | [2 <b>BiPh</b> +2 <b>NON</b> -4H <sub>2</sub> O]<br><b>BiPh</b> <sub>2</sub> ( <b>NON</b> ) <sub>2</sub> | C <sub>36</sub> H <sub>36</sub> N <sub>4</sub> O <sub>2</sub> | +H <sup>+</sup>  | 557.2911   | 557.2904  |
|       |                                                                                                          |                                                               | +Na <sup>+</sup> | 579.2730   | 579.2722  |
|       |                                                                                                          |                                                               | +2H <sup>+</sup> | 279.1492   | 279.1490  |
| 11    | [ <b>pPh</b> + <b>BiPh</b> + <b>NON</b> -<br>2H <sub>2</sub> O]                                          | C <sub>26</sub> H <sub>24</sub> N <sub>2</sub> O <sub>3</sub> | +H <sup>+</sup>  | 413.1860   | 413.1852  |
|       |                                                                                                          |                                                               | +Na <sup>+</sup> | 435.1679   | 435.1672  |
|       |                                                                                                          |                                                               | +2H <sup>+</sup> | 207.0966   | N/A       |
| 12    | [ <b>pPh</b> + <b>BiPh</b> +2 <b>NON</b> -<br>3H <sub>2</sub> O]                                         | C <sub>30</sub> H <sub>34</sub> N <sub>4</sub> O <sub>3</sub> | +H <sup>+</sup>  | 499.2704   | 499.2697  |
|       |                                                                                                          |                                                               | +Na <sup>+</sup> | 521.2523   | N/A       |
|       |                                                                                                          |                                                               | +2H <sup>+</sup> | 250.1388   | 250.1384  |
| 13    | [ <b>pPh</b> + <b>BiPh</b> +2 <b>NON</b> -<br>4H <sub>2</sub> O]<br><b>(pPh)(BiPh)(NON)</b> <sub>2</sub> | C <sub>30</sub> H <sub>32</sub> N <sub>4</sub> O <sub>2</sub> | +H <sup>+</sup>  | 481.2598   | 481.2592  |
|       |                                                                                                          |                                                               | +Na <sup>+</sup> | 503.2417   | 503.2413  |
|       |                                                                                                          |                                                               | +2H <sup>+</sup> | 241.1335   | 241.1331  |

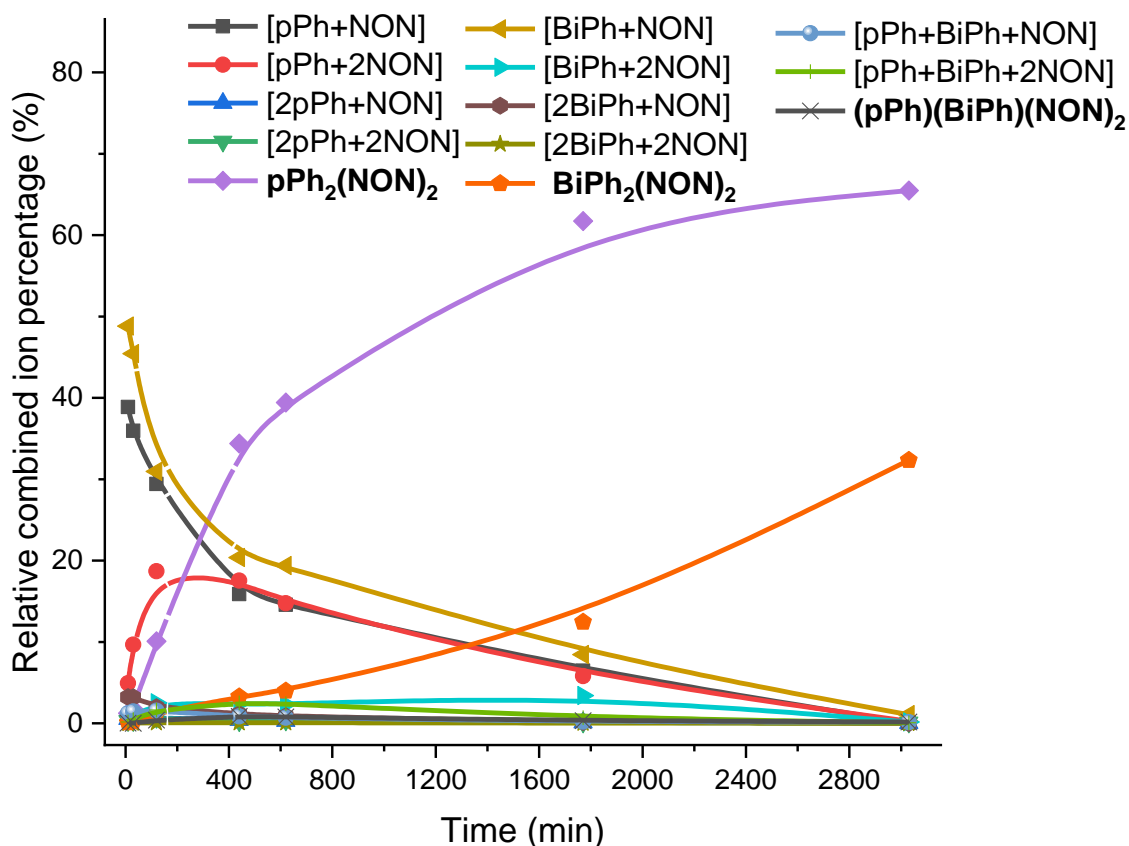

**Fig. S45.** HRMS-ESI kinetic evolution of the species generated during the self-sorting process of  $2\text{pPh} + 2\text{BiPh} + 4\text{NON}$  (50%-50%  $\text{CHCl}_3/\text{MeOH}$ , r.t) as a function of time over 1440 min. NB: The relative combined ion percentage is obtained by the ratio of combined ion count of each species to the sum of combined ion counts for all species at each time point. These data do not provide quantitative information about the relative amounts of each species identified by its mass, but, taken separately, they display the evolution of a given identified species during the course of the reaction. The curves are added to guide the eye.

**Table S6.** HRMS-ESI intensity comparison of heteroleptic macrocycle  $(\text{pPh})(\text{BiPh})(\text{NON})_2$  with homoleptic macrocycles

| Time (min) | $I_1$ (a.u.) | $I_2$ (a.u.) | $I_3$ (a.u.) | $I_3/\text{avg.}(I_1+I_2) * 100$ (%) |
|------------|--------------|--------------|--------------|--------------------------------------|
| 10         | 1.86E+07     | 1.49E+06     | 0            | 0.00                                 |
| 30         | 3.81E+07     | 5.10E+06     | 180494       | 0.83                                 |
| 120        | 4.06E+08     | 4.99E+07     | 1.61E+07     | 7.08                                 |
| 180        | 7.00E+08     | 7.16E+07     | 2.47E+07     | 6.41                                 |
| 500        | 6.75E+08     | 6.36E+07     | 1.59E+07     | 4.29                                 |
| 620        | 6.98E+08     | 7.06E+07     | 1.41E+07     | 3.68                                 |
| 750        | 7.32E+08     | 8.20E+07     | 1.30E+07     | 3.19                                 |
| 1440       | 7.08E+08     | 1.03E+08     | 6.96E+06     | 1.72                                 |

$I_1$ : combined ion count of  $\text{BiPh}_2(\text{NON})_2$

$I_2$ : combined ion count of  $\text{pPh}_2(\text{NON})_2$

$I_3$ : combined ion count of  $(\text{pPh})(\text{BiPh})(\text{NON})_2$

## 7.2 Self-sorting experiment 3pPh + 3BiPh + 4T

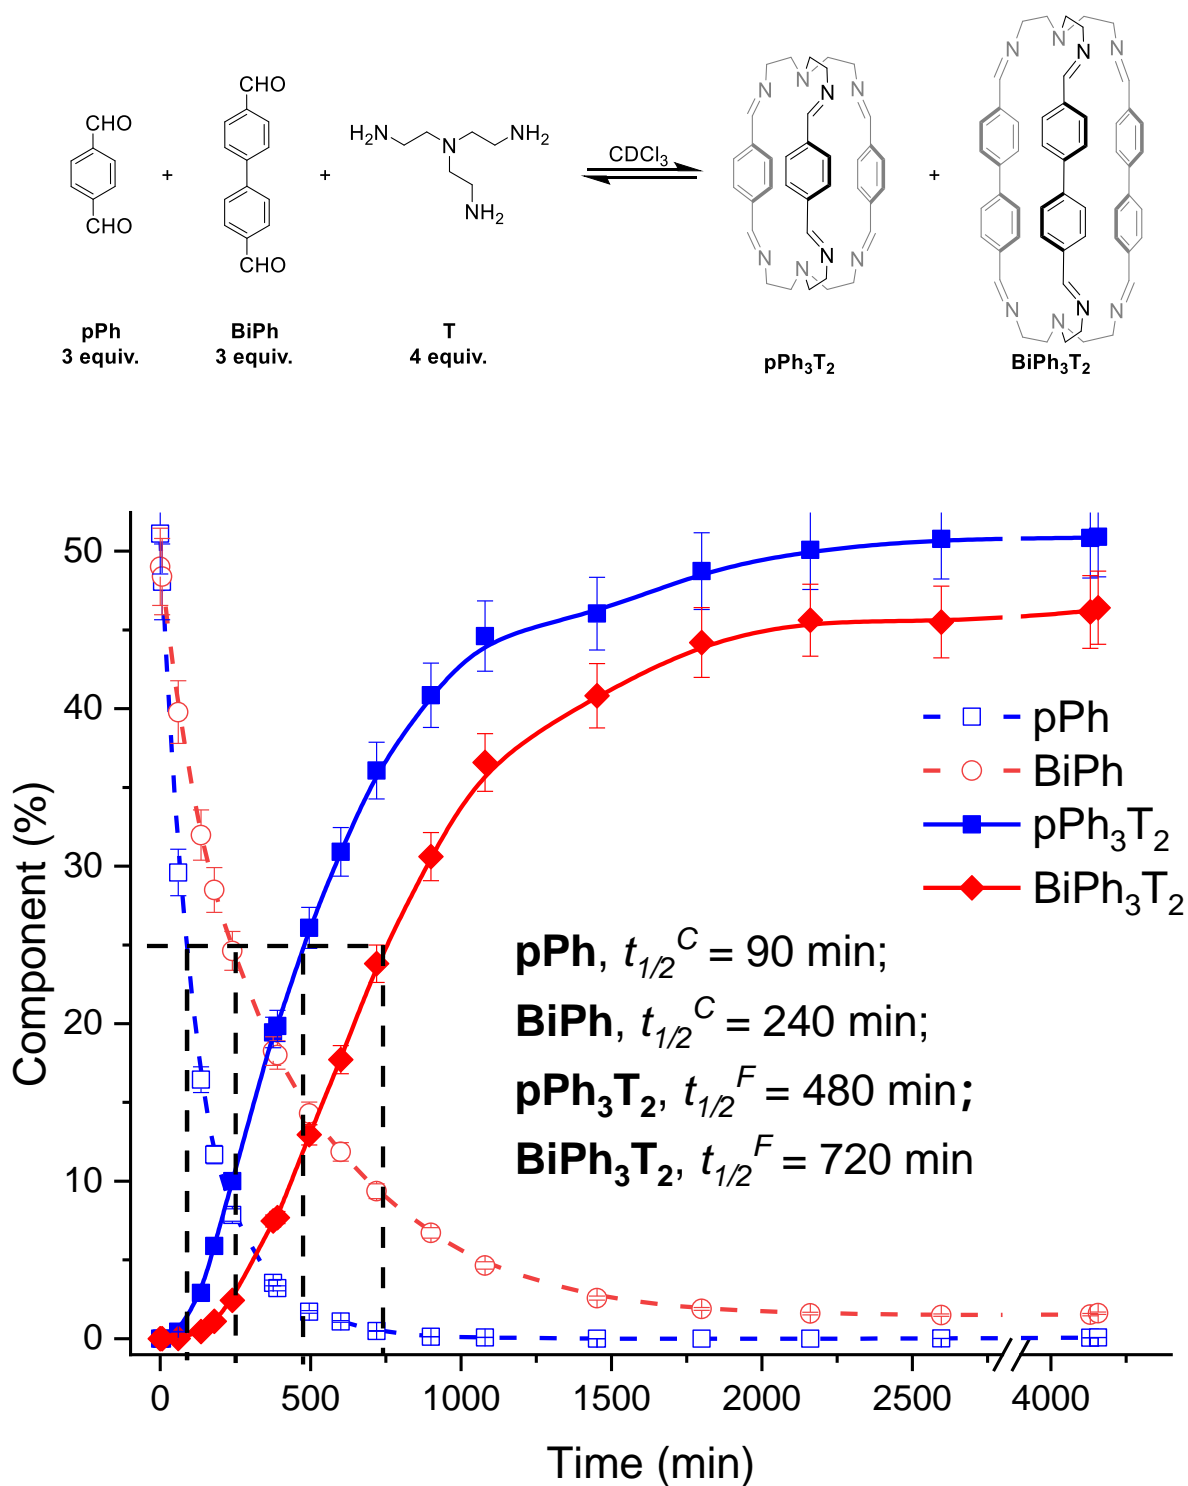

**Fig. S46**  $^1\text{H}$  NMR monitoring during the self-sorting of **pPh<sub>3</sub>T<sub>2</sub>** and **BiPh<sub>3</sub>T<sub>2</sub>** in fresh aluminum treated  $\text{CDCl}_3$ . Error in  $^1\text{H}$ -NMR signal integration:  $\pm 5\%$ .

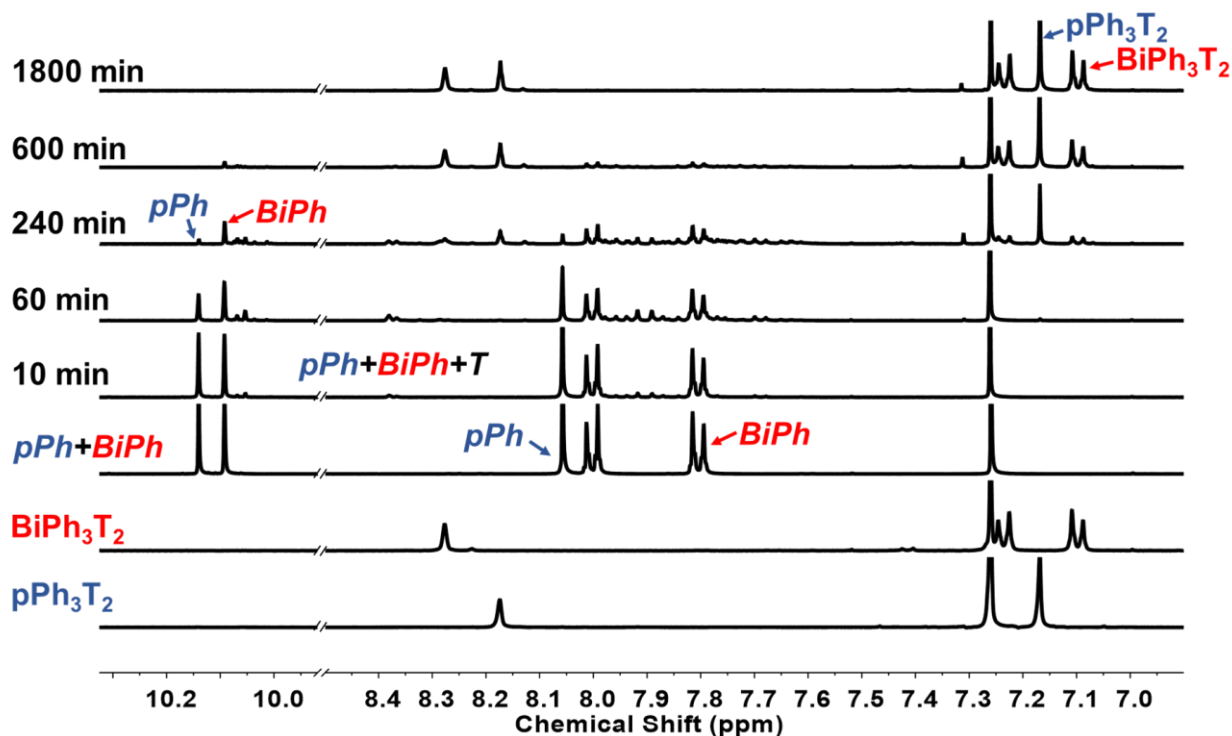

**Fig. S47** Temporal evolution of the  $^1\text{H}$  NMR spectra (400 MHz,  $\text{CDCl}_3$ , 23 °C) during the self-sorting of  $\text{pPh}_3\text{T}_2$  and  $\text{BiPh}_3\text{T}_2$  in dated aluminum treated  $\text{CDCl}_3$ .

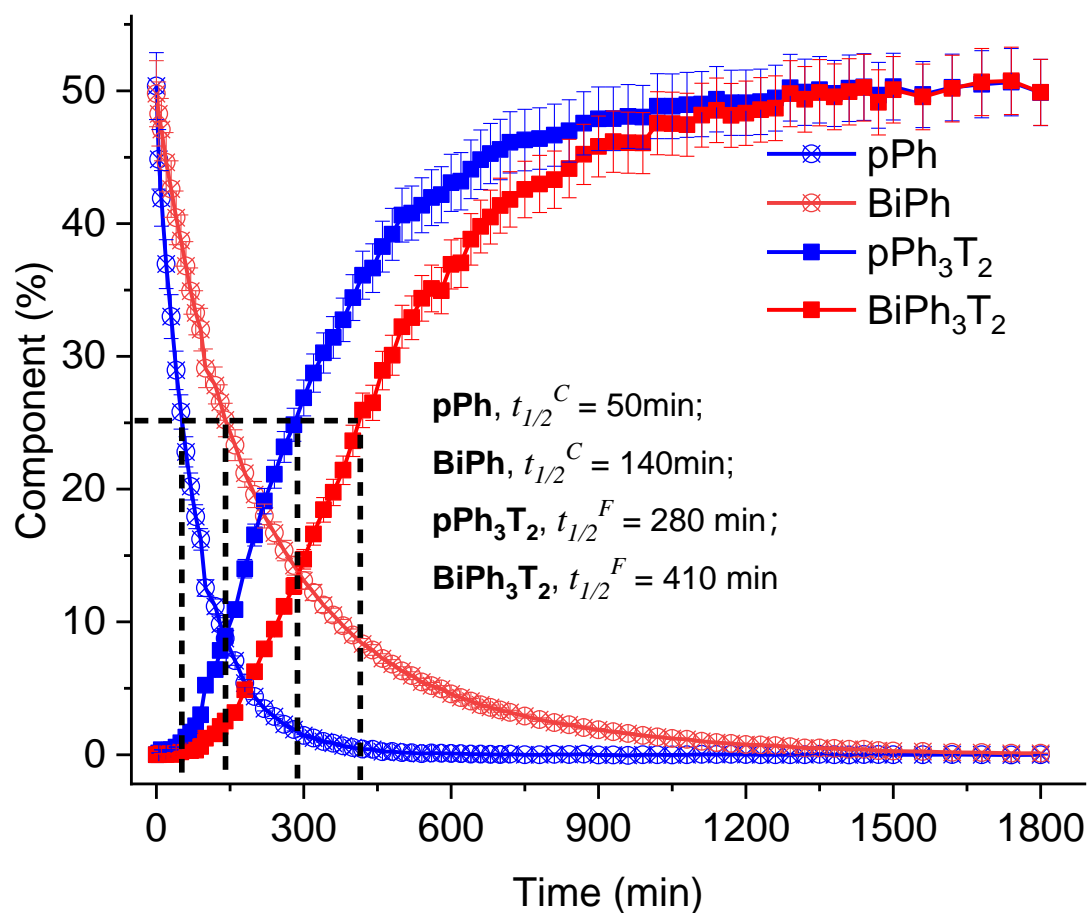

**Fig. S48**  $^1\text{H}$  NMR monitoring during the self-sorting of  $\text{pPh}_3\text{T}_2$  and  $\text{BiPh}_3\text{T}_2$  in dated aluminum treated  $\text{CDCl}_3$ . Error in  $^1\text{H}$ -NMR signal integration:  $\pm 5\%$ .

**Table S7** HRMS-ESI assignments of the Key Species Identified during the self-sorting reaction of **3pPh + 3BiPh + 4T**.

| Entry | assignment                                                                       | formula    | Combined ion     | m/z calcd. | m/z found        |
|-------|----------------------------------------------------------------------------------|------------|------------------|------------|------------------|
| 1     | <b>T</b>                                                                         | C6H18N4    | +H <sup>+</sup>  | 147.1604   | 147.1597         |
|       |                                                                                  |            | +Na <sup>+</sup> | 169.1424   | 169.1415         |
| 2     | [ <b>pPh+T-H<sub>2</sub>O</b> ]                                                  | C14H22N4O  | +H <sup>+</sup>  | 263.1866   | 263.1852         |
|       |                                                                                  |            | +Na <sup>+</sup> | 285.1686   | 285.1671         |
|       |                                                                                  |            | +2H <sup>+</sup> | 132.0970   | N/A              |
| 3     | [ <b>2pPh+T-2H<sub>2</sub>O</b> ]                                                | C22H26N4O2 | +H <sup>+</sup>  | 379.2129   | 379.2100         |
|       |                                                                                  |            | +Na <sup>+</sup> | 401.1948   | 401.1924         |
|       |                                                                                  |            | +2H <sup>+</sup> | 190.1101   | N/A              |
| 4     | [ <b>3pPh+T-3H<sub>2</sub>O</b> ]                                                | C30H30N4O3 | +H <sup>+</sup>  | 495.2391   | 495.2362         |
|       |                                                                                  |            | +Na <sup>+</sup> | 517.2210   | N/A              |
|       |                                                                                  |            | +2H <sup>+</sup> | 248.1232   | N/A              |
| 5     | [ <b>pPh+2T-2H<sub>2</sub>O</b> ]                                                | C20H38N8   | +H <sup>+</sup>  | 391.3292   | 391.3262         |
|       |                                                                                  |            | +Na <sup>+</sup> | 413.3112   | 413.3083         |
|       |                                                                                  |            | +2H <sup>+</sup> | 196.1682   | 196.1671         |
| 6     | [ <b>2pPh+2T-4H<sub>2</sub>O</b> ]                                               | C28H40N8   | +H <sup>+</sup>  | 489.3449   | 489.3417         |
|       |                                                                                  |            | +Na <sup>+</sup> | 511.3268   | 511.3236         |
|       |                                                                                  |            | +2H <sup>+</sup> | 245.1761   | 245.1745         |
| 7     | [ <b>3pPh+2T-6H<sub>2</sub>O</b> ]<br>Cage <b>pPh<sub>3</sub>T<sub>2</sub></b>   | C36H42N8   | +H <sup>+</sup>  | 587.3605   | 587.3567         |
|       |                                                                                  |            | +Na <sup>+</sup> | 609.3425   | 609.3391         |
|       |                                                                                  |            | +2H <sup>+</sup> | 294.1839   | 294.1820         |
| 8     | [ <b>BiPh+T-H<sub>2</sub>O</b> ]                                                 | C20H26N4O  | +H <sup>+</sup>  | 339.2179   | 339.2156         |
|       |                                                                                  |            | +Na <sup>+</sup> | 361.1999   | 361.1974         |
|       |                                                                                  |            | +2H <sup>+</sup> | 170.1126   | N/A              |
| 9     | [ <b>2BiPh+T-2H<sub>2</sub>O</b> ]                                               | C34H34N4O2 | +H <sup>+</sup>  | 531.2755   | 531.2723         |
|       |                                                                                  |            | +Na <sup>+</sup> | 553.2574   | 553.2543         |
|       |                                                                                  |            | +2H <sup>+</sup> | 266.1414   | N/A              |
| 10    | [ <b>3BiPh+T-3H<sub>2</sub>O</b> ]                                               | C48H42N4O3 | +H <sup>+</sup>  | 723.3330   | 723.3093         |
|       |                                                                                  |            | +Na <sup>+</sup> | 745.3149   | N/A              |
|       |                                                                                  |            | +2H <sup>+</sup> | 362.1701   | 362.1998         |
| 11    | [ <b>BiPh+2T-2H<sub>2</sub>O</b> ]                                               | C26H42N8   | +H <sup>+</sup>  | 467.3605   | 467.3576         |
|       |                                                                                  |            | +Na <sup>+</sup> | 489.3425   | N/A <sup>a</sup> |
|       |                                                                                  |            | +2H <sup>+</sup> | 234.1839   | 234.1827         |
| 12    | [ <b>2BiPh+2T-4H<sub>2</sub>O</b> ]                                              | C40H48N8   | +H <sup>+</sup>  | 641.4075   | 641.4045         |
|       |                                                                                  |            | +Na <sup>+</sup> | 663.3844   | 663.3864         |
|       |                                                                                  |            | +2H <sup>+</sup> | 321.2052   | 321.2054         |
| 13    | [ <b>3BiPh+2T-6H<sub>2</sub>O</b> ]<br>Cage <b>BiPh<sub>3</sub>T<sub>2</sub></b> | C54H54N8   | +H <sup>+</sup>  | 815.4544   | 815.4494         |
|       |                                                                                  |            | +Na <sup>+</sup> | 837.4364   | 837.4312         |
|       |                                                                                  |            | +2H <sup>+</sup> | 408.2308   | 408.2308         |
| 14    | [ <b>pPh+BiPh+T-2H<sub>2</sub>O</b> ]                                            | C28H30N4O2 | +H <sup>+</sup>  | 455.2442   | 455.2415         |
|       |                                                                                  |            | +Na <sup>+</sup> | 477.2261   | 477.2226         |
|       |                                                                                  |            | +2H <sup>+</sup> | 228.1257   | N/A              |
| 15    | [ <b>2pPh+BiPh+T-3H<sub>2</sub>O</b> ]                                           | C36H34N4O3 | +H <sup>+</sup>  | 571.2704   | 571.2659         |
|       |                                                                                  |            | +Na <sup>+</sup> | 593.2523   | N/A              |
|       |                                                                                  |            | +2H <sup>+</sup> | 286.1388   | N/A              |

|    |                                  |            |                                                         |                                  |                                          |
|----|----------------------------------|------------|---------------------------------------------------------|----------------------------------|------------------------------------------|
| 16 | [pPh+2BiPh+T-3H <sub>2</sub> O]  | C42H38N4O3 | +H <sup>+</sup><br>+Na <sup>+</sup><br>+2H <sup>+</sup> | 647.3017<br>669.2836<br>324.1545 | 647.2968<br>N/A<br>N/A                   |
| 17 | [pPh+BiPh+2T-3H <sub>2</sub> O]  | C34H46N8O  | +H <sup>+</sup><br>+Na <sup>+</sup><br>+2H <sup>+</sup> | 583.3867<br>605.3687<br>292.1970 | 583.3823<br>605.3699<br>292.1949         |
| 18 | [pPh+BiPh+2T-4H <sub>2</sub> O]  | C34H44N8   | +H <sup>+</sup><br>+Na <sup>+</sup><br>+2H <sup>+</sup> | 565.3762<br>587.3581<br>283.1917 | 565.3561<br>N/A <sup>a</sup><br>283.1897 |
| 19 | [2pPh+BiPh+2T-5H <sub>2</sub> O] | C42H48N8O  | +H <sup>+</sup><br>+Na <sup>+</sup><br>+2H <sup>+</sup> | 681.4024<br>703.3843<br>341.2048 | 681.3974<br>7.3.3795<br>341.2025         |
| 20 | [pPh+2BiPh+2T-4H <sub>2</sub> O] | C48H54N8O2 | +H <sup>+</sup><br>+Na <sup>+</sup><br>+2H <sup>+</sup> | 775.4442<br>797.4262<br>388.2258 | N/A<br>797.4228<br>388.2229              |
| 21 | [pPh+2BiPh+2T-5H <sub>2</sub> O] | C48H52N8O  | +H <sup>+</sup><br>+Na <sup>+</sup><br>+2H <sup>+</sup> | 757.4337<br>779.4156<br>379.2205 | 757.4284<br>779.4086<br>379.2188         |
| 22 | [pPh+2BiPh+2T-6H <sub>2</sub> O] | C48H50N8   | +H <sup>+</sup><br>+Na <sup>+</sup><br>+2H <sup>+</sup> | 739.4231<br>761.4051<br>370.2152 | 739.4170<br>761.3801<br>370.2128         |

- a. Unable to read the mass-to-charge ratio (m/z) abundance as it possesses extremely close m/z value with other highly responded ion-combined species.

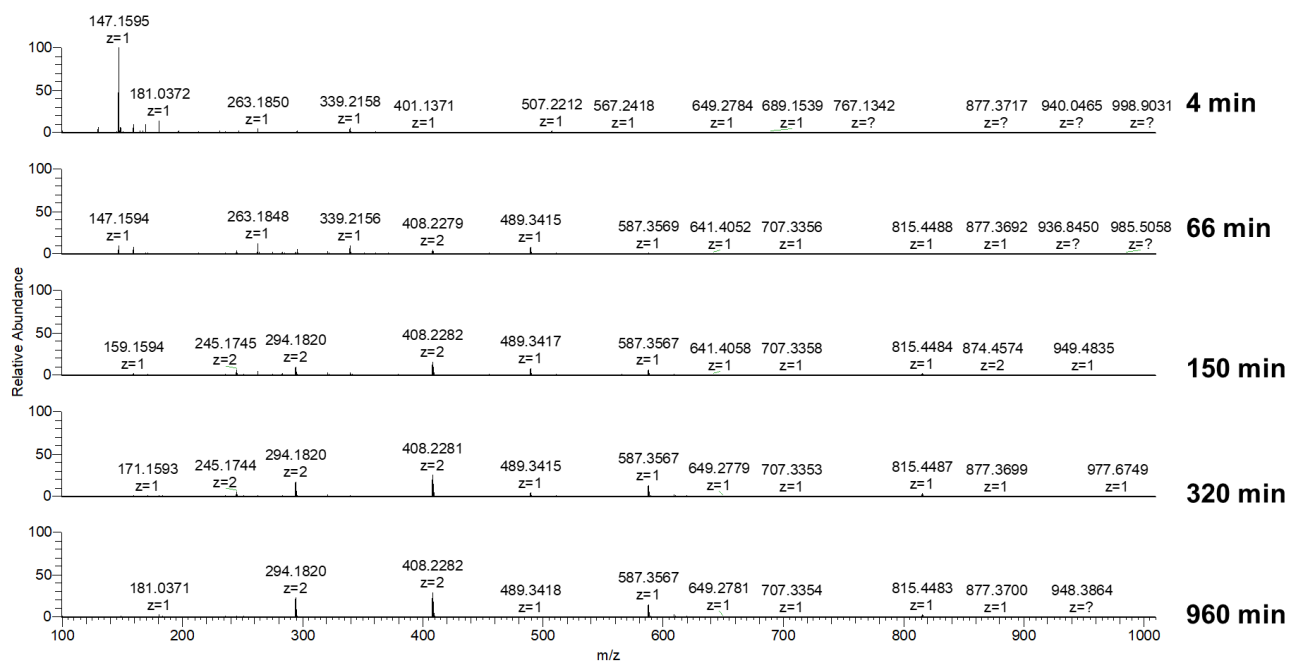

**Fig. S49** Temporal evolution of the HRMS-ESI spectra of the 3/3/4 mixture of pPh (2 mM), BiPh (2 mM) and T in 50%-50% CHCl<sub>3</sub>/MeOH.

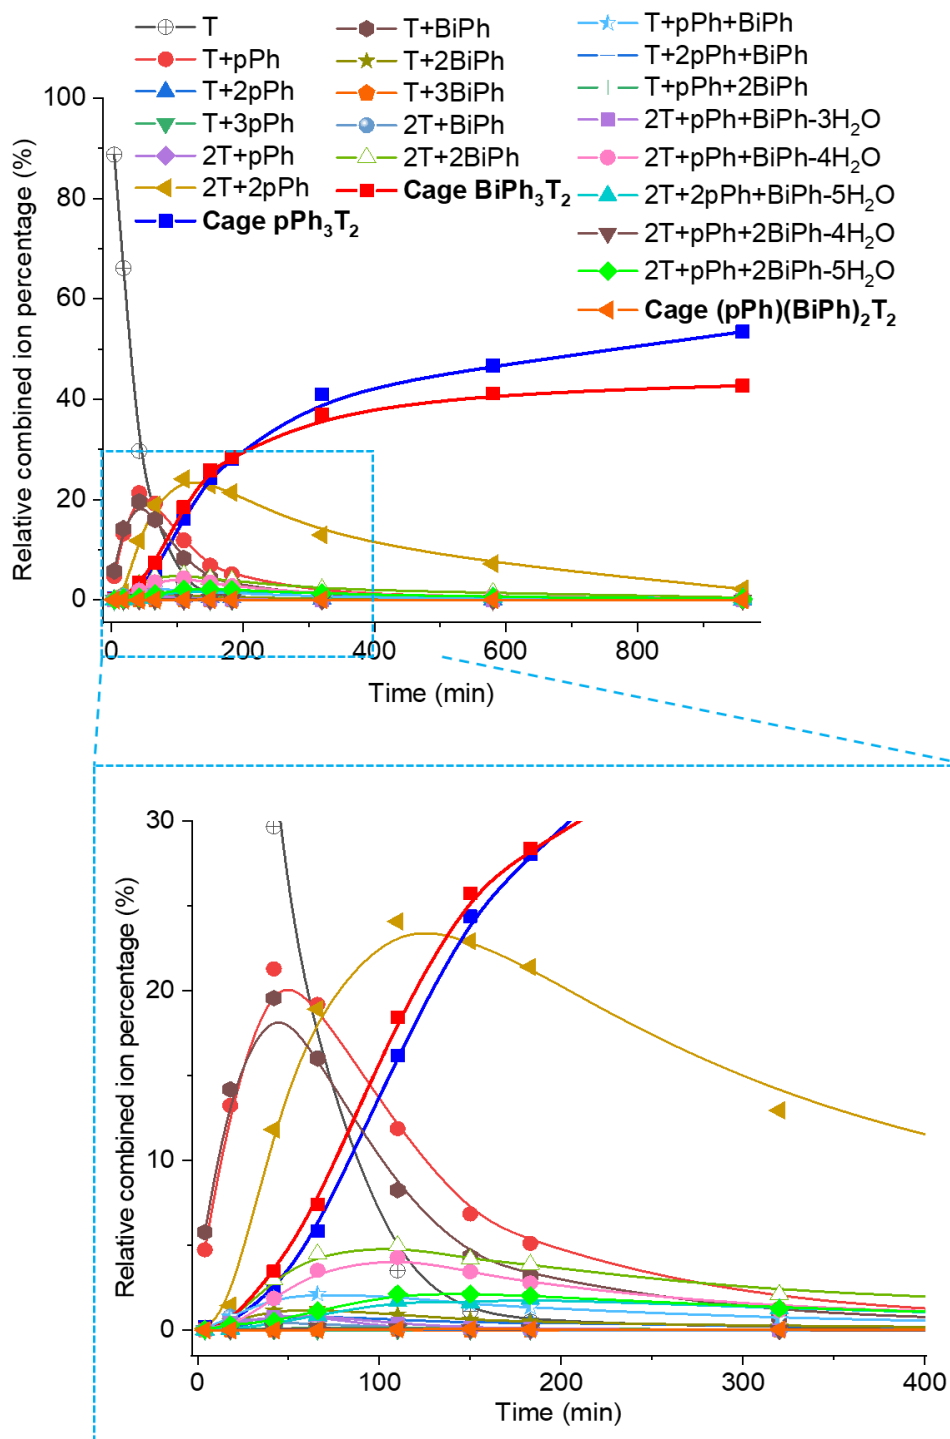

**Fig. S50** HRMS-ESI monitoring of the evolution of the species generated during the reaction of 3pPh + 3BiPh + 4T (50%-50% CHCl<sub>3</sub>/MeOH, r.t) as a function of time over 960 min. NB: The relative combined ion percentage is obtained by the ratio of combined ion count of each species to the sum of combined ion counts for all species at each time point. These data do not provide quantitative information about the relative amounts of each species identified by its mass, but, taken separately, they display the evolution of a given identified species during the course of the reaction. The curves are added to guide the eye.

**Table S8.** HRMS-ESI intensity comparison of heteroleptic cages **(pPh)(BiPh)<sub>2</sub>T<sub>2</sub>** with homoleptic cages

| Time (min) | I <sub>1</sub> (a.u.) | I <sub>2</sub> (a.u.) | I <sub>3</sub> (a.u.) | I <sub>3</sub> /avg. (I <sub>1</sub> +I <sub>2</sub> )*100 (%) |
|------------|-----------------------|-----------------------|-----------------------|----------------------------------------------------------------|
| 4          | 8.39E+06              | 1.83E+06              | 0                     | 0.00                                                           |
| 18         | 1.28E+07              | 1.44E+07              | 0                     | 0.00                                                           |
| 42         | 5.22E+07              | 7.67E+07              | 0                     | 0.00                                                           |
| 66         | 1.29E+08              | 1.64E+08              | 315227.5              | 0.22                                                           |
| 110        | 3.34E+08              | 3.80E+08              | 1.22E+06              | 0.34                                                           |
| 150        | 5.45E+08              | 5.76E+08              | 1.64E+06              | 0.29                                                           |
| 183        | 6.80E+08              | 6.88E+08              | 1.43E+06              | 0.21                                                           |
| 320        | 1.02E+09              | 9.16E+08              | 1.10E+06              | 0.11                                                           |
| 580        | 1.16E+09              | 1.02E+09              | 685708.5              | 0.06                                                           |
| 960        | 1.27E+09              | 1.02E+09              | 175837.5              | 0.02                                                           |

I<sub>1</sub>: combined ion count of **pPh<sub>3</sub>T<sub>2</sub>**

I<sub>2</sub>: combined ion count of **BiPh<sub>3</sub>T<sub>2</sub>**

I<sub>3</sub>: combined ion count of **(pPh)(BiPh)<sub>2</sub>T<sub>2</sub>**



### 7.3 Stepwise self-sorting experiment with BiPh, T and pPh.

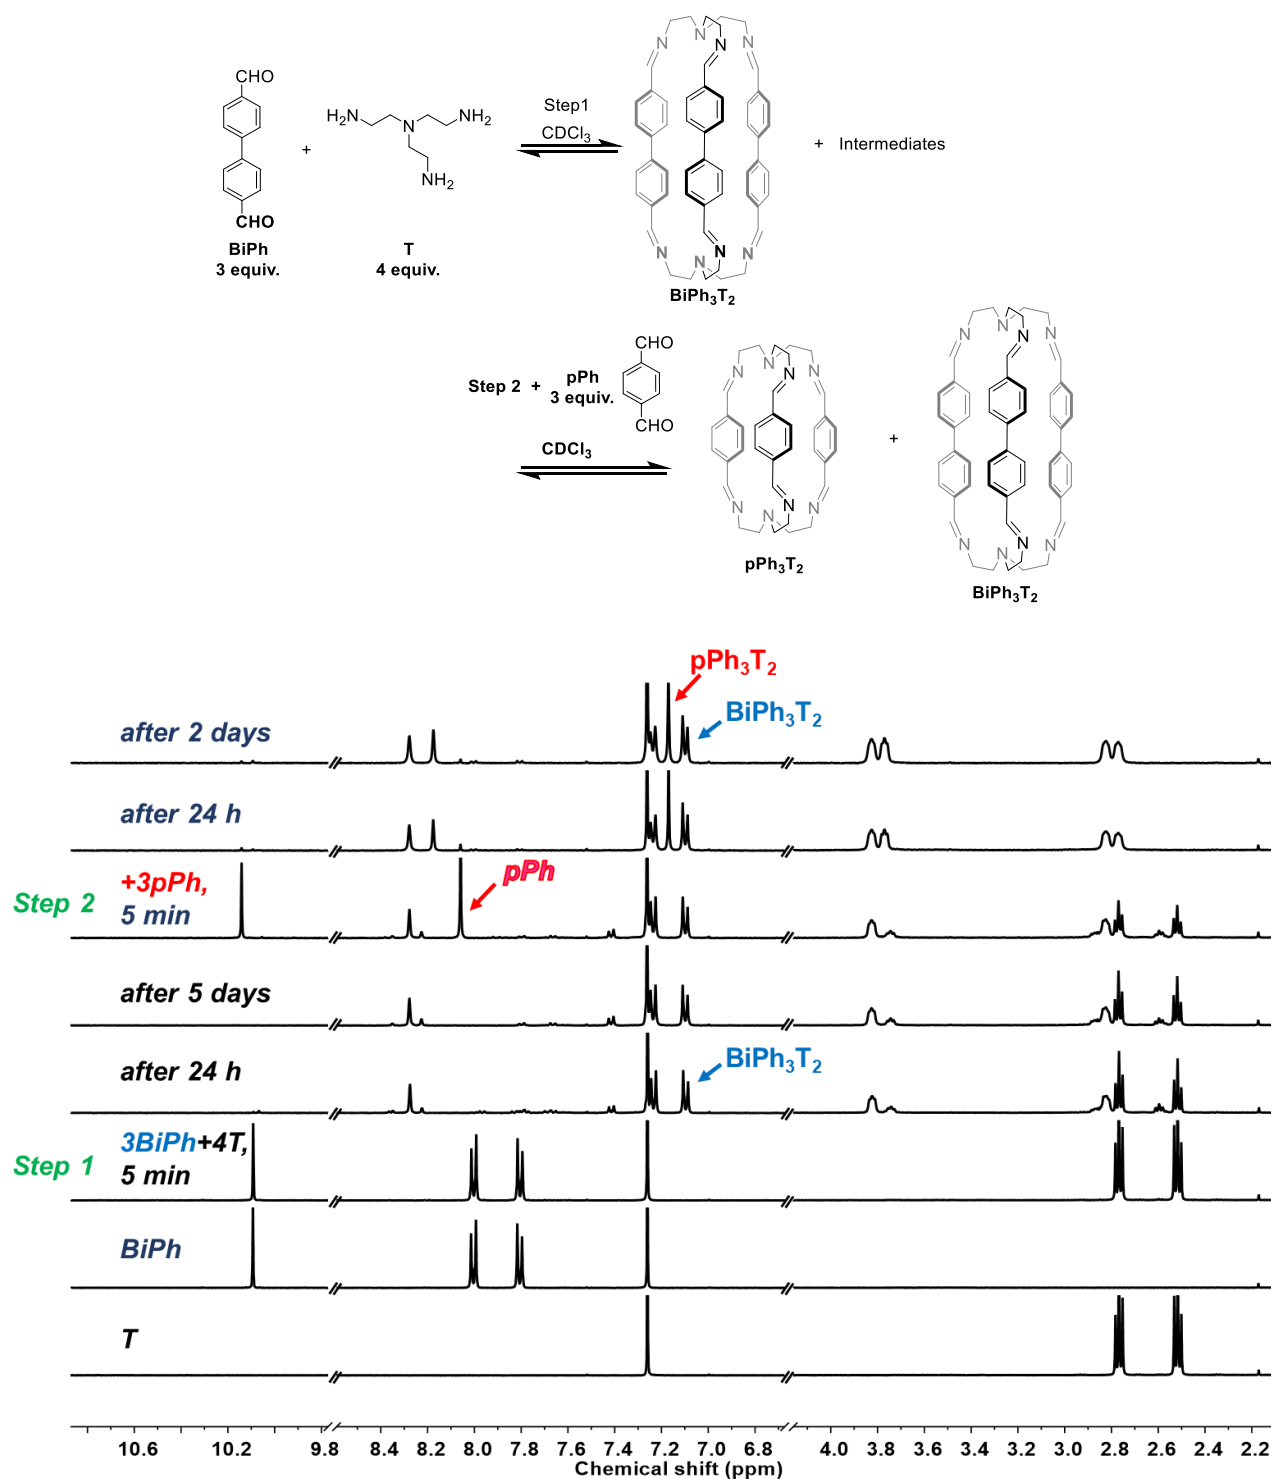

**Fig. S51** Temporal evolution of the <sup>1</sup>H NMR (400 MHz, CDCl<sub>3</sub>, 23 °C) spectra of stepwise self-sorting by addition of 3 equiv. pPh to the 3BiPh + 4T solution ([BiPh]<sub>0</sub> = 3.6 mM) in dated aluminum treated CDCl<sub>3</sub>.

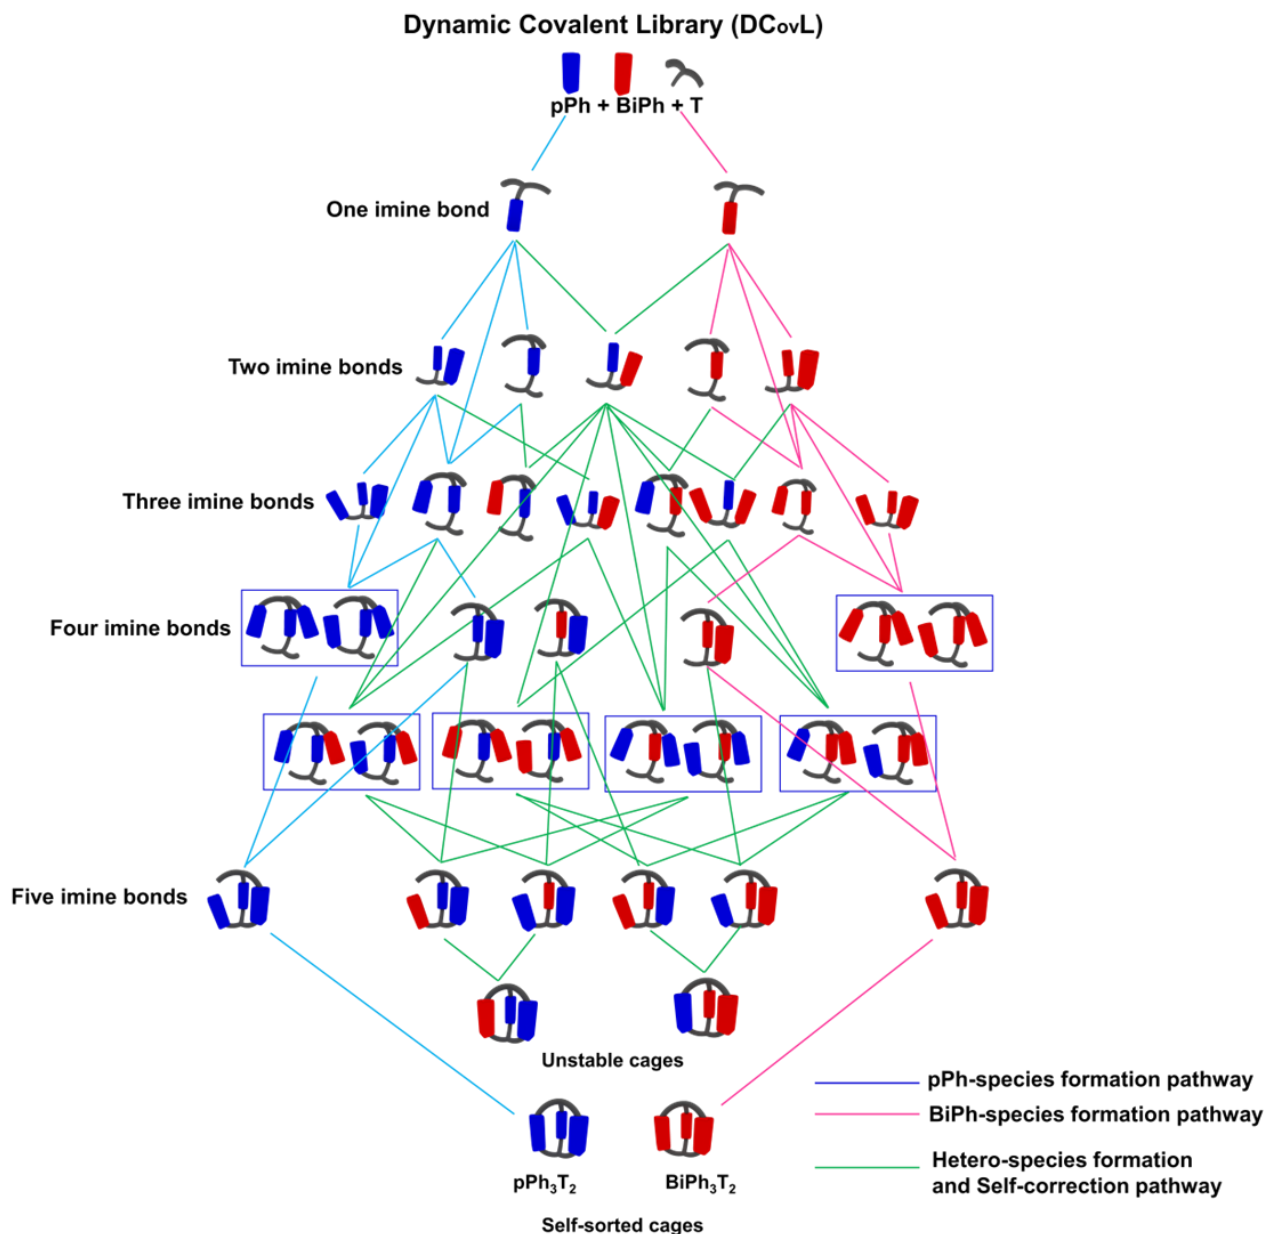

**Fig. S52** Possible reaction processes in the three-component [3+2] imine-cage self-sorting system. Blue and red cuboid represent the dialdehyde units, the three-jaw figure represent the triamine T. Cyan and pink lines correspond to the homoleptic reactions to form  $[x\text{pPh}+y\text{T}]$  and  $[x\text{BiPh}+y\text{T}]$  species, respectively. Green lines correspond to the heteroleptic pathways and self-correction pathways.

#### 7.4 DFT calculations

DFT calculations were run with Gaussian 09 (revision B.01).<sup>6</sup> Geometry optimizations were carried out without symmetry restrictions at the B3LYP level,<sup>7</sup> using the 6-311+G(d,p) basis set. The calculations were performed using chloroform as solvent with the Polarizable Continuum Model (PCM) model. Analytical frequency calculations were used to characterise each stationary point as a minimum. These calculations, carried out at 298.15 K, also allowed for obtaining the thermal and entropic corrections required to calculate Gibbs energy differences.

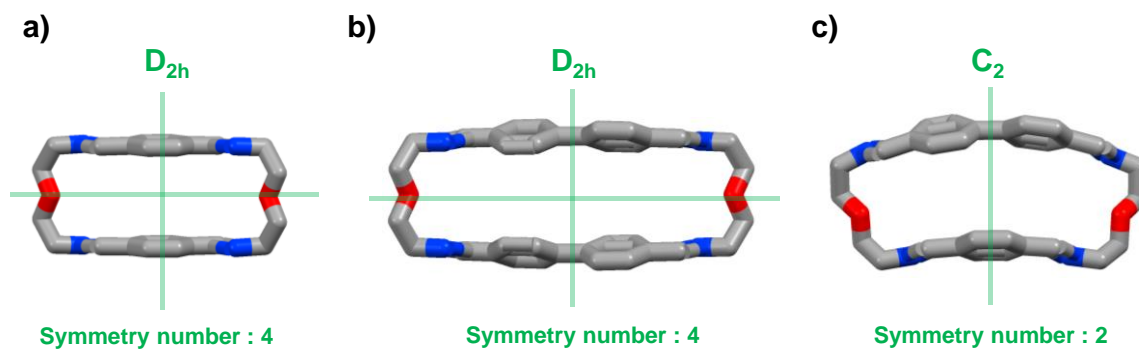

**Fig. S53** DFT calculated lowest-in-energy conformations and symmetry numbers for the homoleptic and heteroleptic macrocycles. a)  $pPh_2(NON)_2$ . b)  $BiPh_2(NON)_2$ . c)  $(pPh)(BiPh)(NON)_2$ .

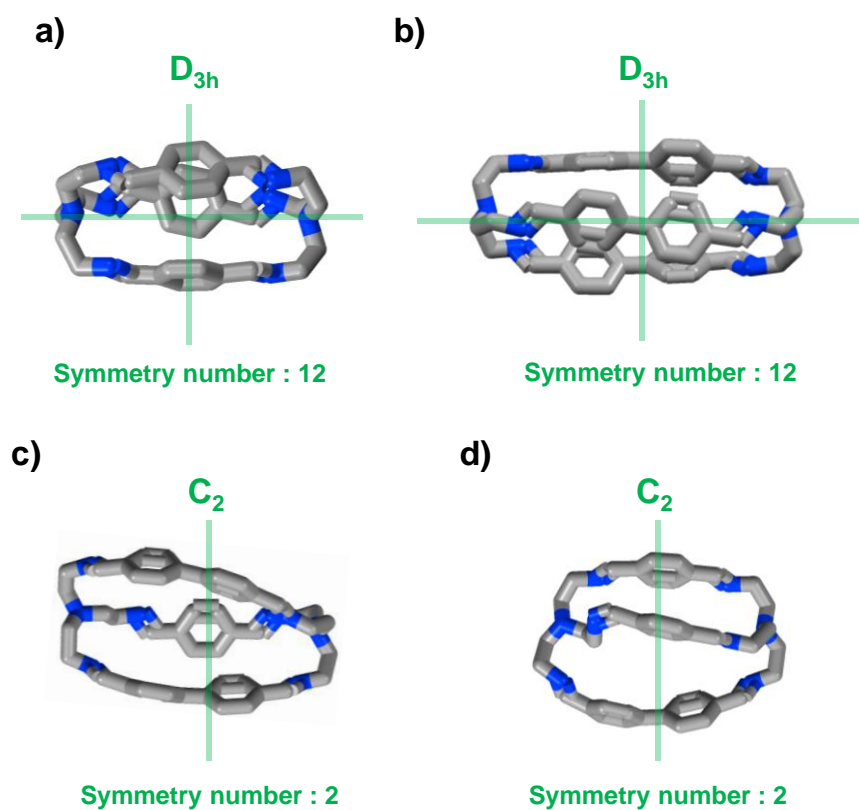

**Fig. S54** DFT calculated lowest-in-energy conformations and symmetry numbers for the homoleptic and heteroleptic macrobicyclic cages. a)  $pPh_3T_2$ . b)  $BiPh_3T_2$ . c)  $(pPh)(BiPh)_2T_2$ . d)  $(pPh)_2(BiPh)T_2$ .

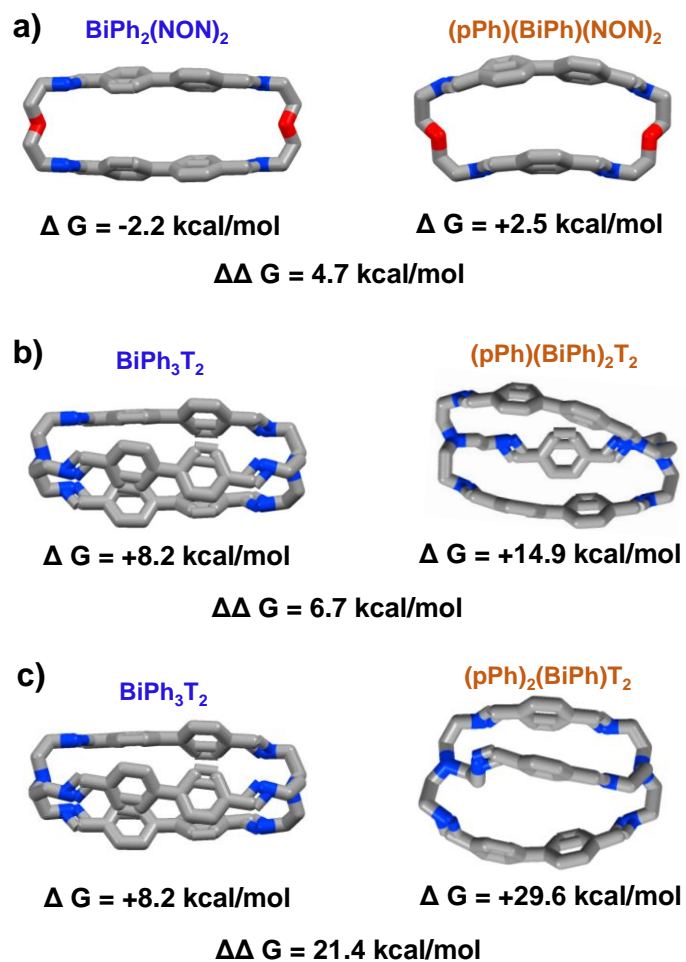

**Fig. S55**  $\Delta\Delta G$  (heteroleptic – homoleptic) calculated for the **BiPh** derived homoleptic constituents and the possible heteroleptic compounds. a) **BiPh<sub>2</sub>(NON)<sub>2</sub>** and **(pPh)(BiPh)(NON)<sub>2</sub>**. b) **BiPh<sub>3</sub>T<sub>2</sub>**. and **(pPh)(BiPh)<sub>2</sub>T<sub>2</sub>**. c) **BiPh<sub>3</sub>T<sub>2</sub>**. and **(pPh)<sub>2</sub>(BiPh)T<sub>2</sub>**.

## 7.5 Self-sorting experiment 2pPh + 2BiPh + 2TriPh + 6NON

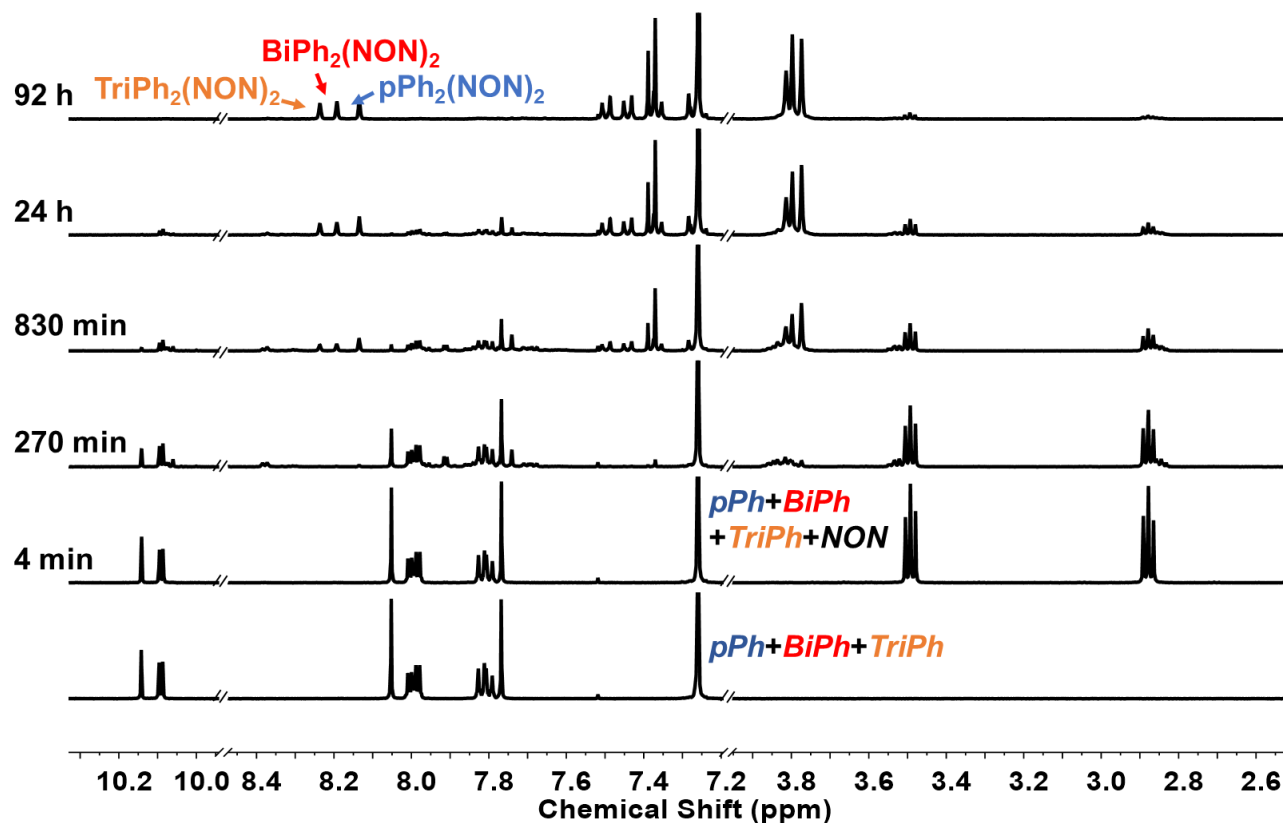

**Fig. S56** Temporal evolution of the  $^1\text{H}$  NMR (400 MHz,  $\text{CDCl}_3$ , 40  $^\circ\text{C}$ ) spectra of 2pPh + 2BiPh + 2TriPh + 6NON ( $[\text{pPh}]_0 = [\text{BiPh}]_0 = [\text{TriPh}]_0 = 1.0$  mM,  $[\text{NON}]_0 = 3.0$  mM).

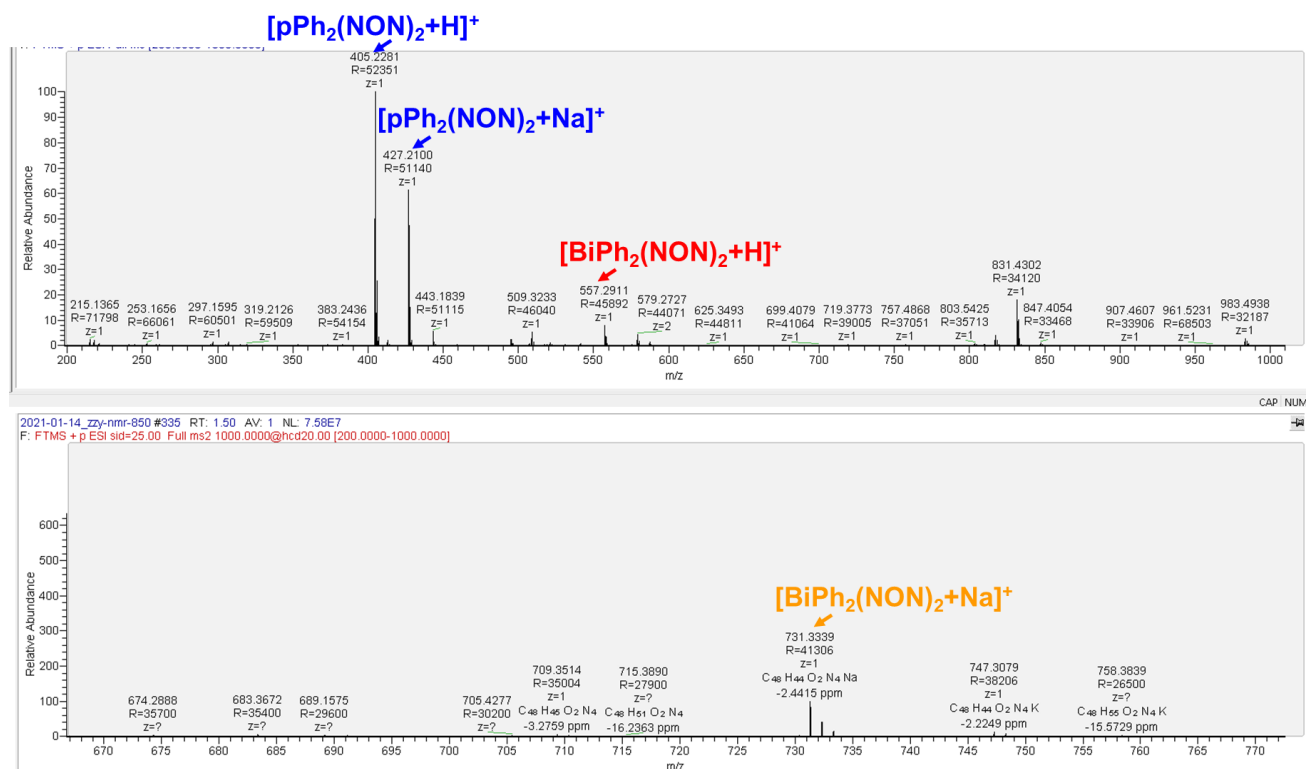

**Fig. S57** HRMS-ESI spectrum of three macrocycles obtained in situ from 2pPh + 2BiPh + 2TriPh + 6NON reaction in  $\text{CDCl}_3$  after the equilibration.

## 7.6 Self-sorting experiment 3pPh + 3BiPh + 3TriPh + 6T

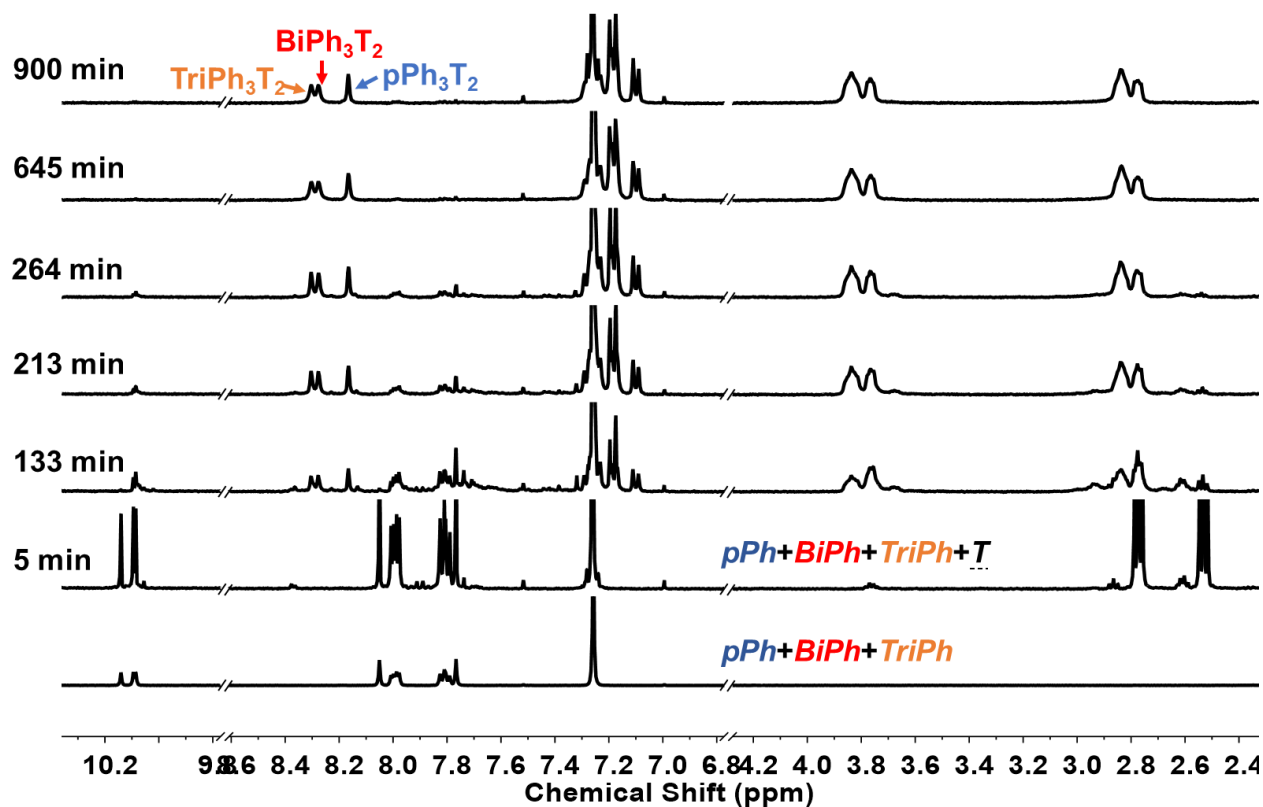

**Fig. S58.** Temporal evolution of the  $^1\text{H}$  NMR (400MHz,  $\text{CDCl}_3$ ,  $40^\circ\text{C}$ ) spectra evolution of  $3\text{pPh} + 3\text{BiPh} + 3\text{TriPh} + 6\text{T}$  ( $[\text{pPh}]_0 = [\text{BiPh}]_0 = [\text{TriPh}]_0 = 1.0\text{ mM}$ ,  $[\text{T}]_0 = 2\text{ mM}$ ).

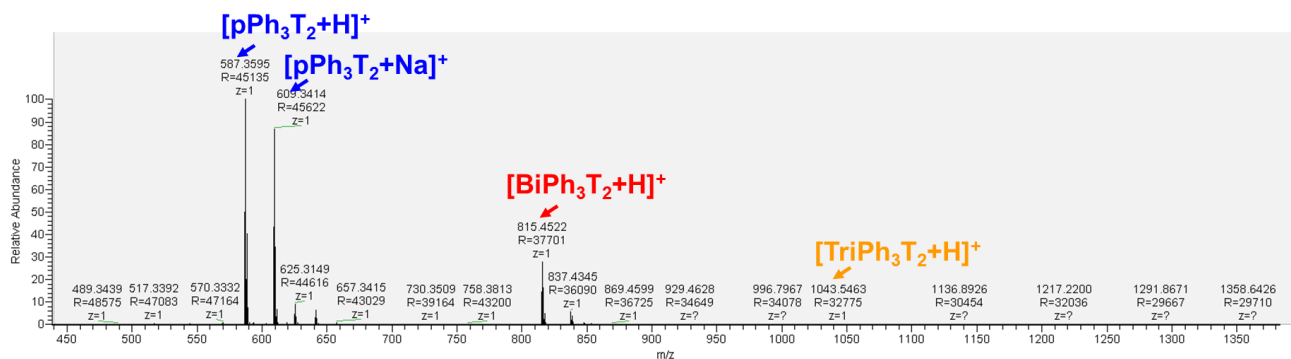

**Fig. S59** HRMS-ESI spectrum of three macrobicyclic cages obtained in situ from  $3\text{pPh} + 3\text{BiPh} + 3\text{TriPh} + 6\text{T}$  reaction in  $\text{CDCl}_3$  after the equilibration.

7.7 Self-sorting experiment 3Py + 3BiPh + 3TriPh + 2T + 6NON

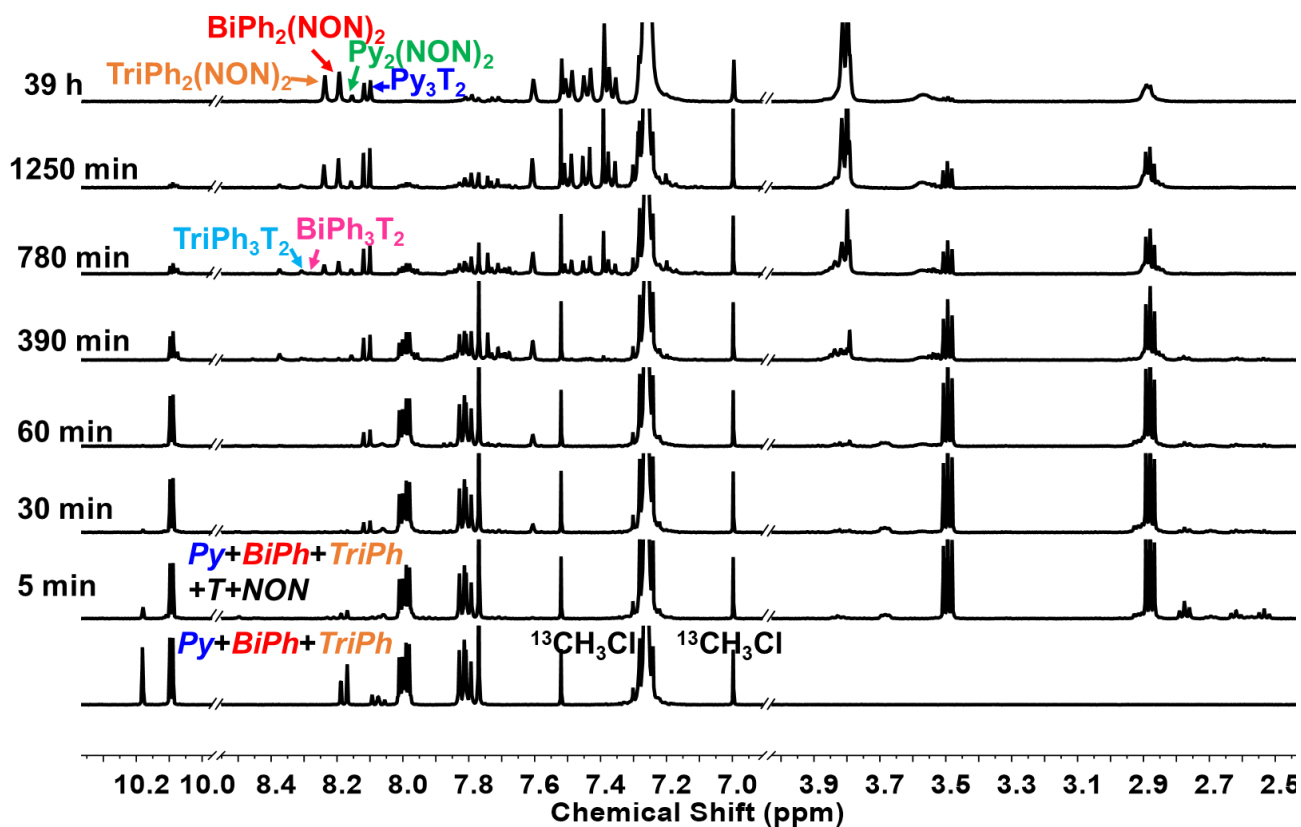

**Fig. S60** Temporal evolution of the  $^1\text{H}$  NMR (400MHz,  $\text{CDCl}_3$ ,  $40^\circ\text{C}$ ) spectra of  $3\text{Py} + 3\text{BiPh} + 3\text{TriPh} + 2\text{T} + 6\text{NON}$  ( $[\text{Py}]_0 = [\text{BiPh}]_0 = [\text{TriPh}]_0 = 1.0 \text{ mM}$ ).

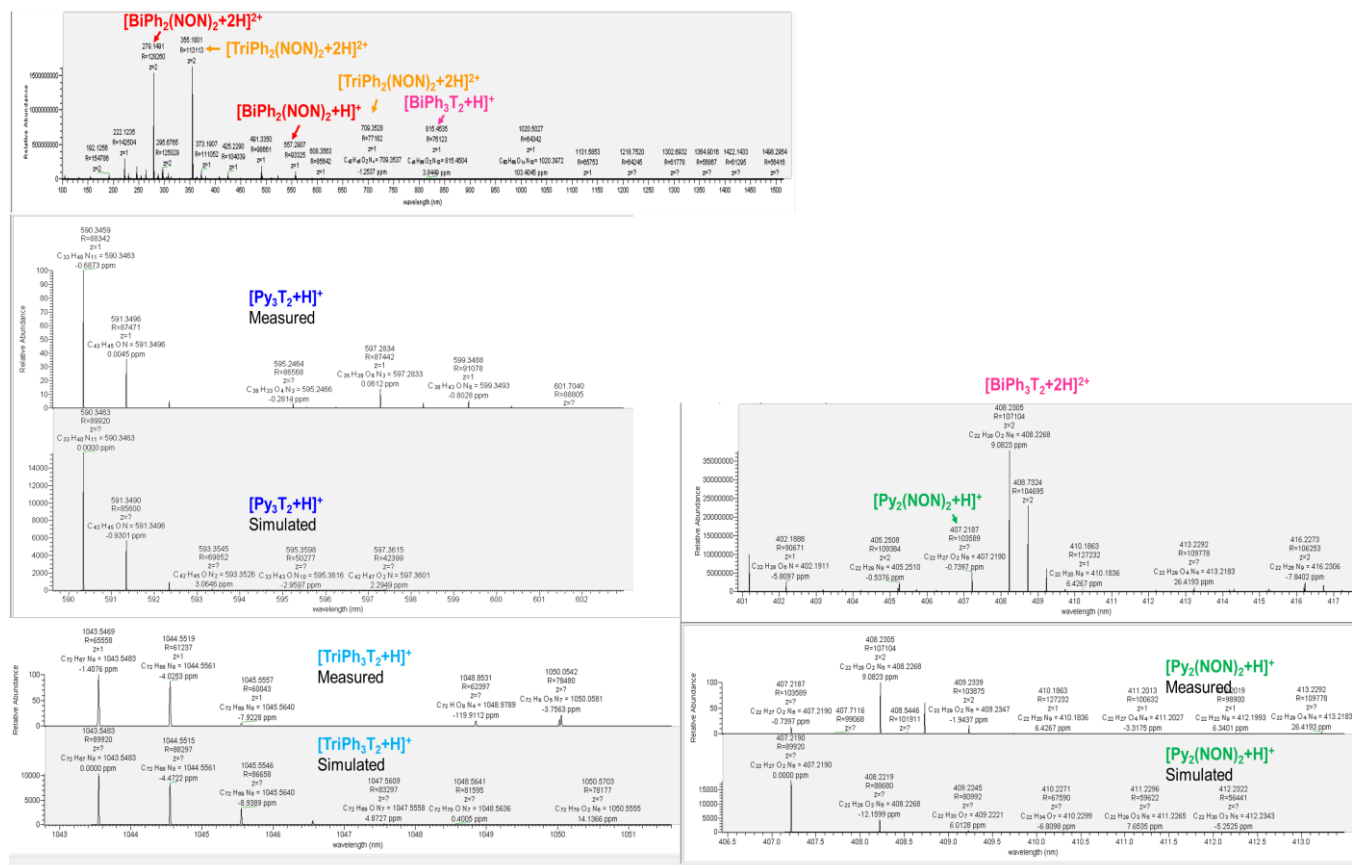

**Fig. S61** HRMS-ESI spectrum of the final products obtained in situ from  $3\text{Py} + 3\text{BiPh} + 3\text{TriPh} + 2\text{T} + 6\text{NON}$  reaction in  $\text{CDCl}_3$  after the equilibration.

### 7.8 Self-sorting experiment $3\text{Py} + 3\text{pPh} + 3\text{BiPh} + 3\text{TriPh} + 2\text{T} + 9\text{NON}$

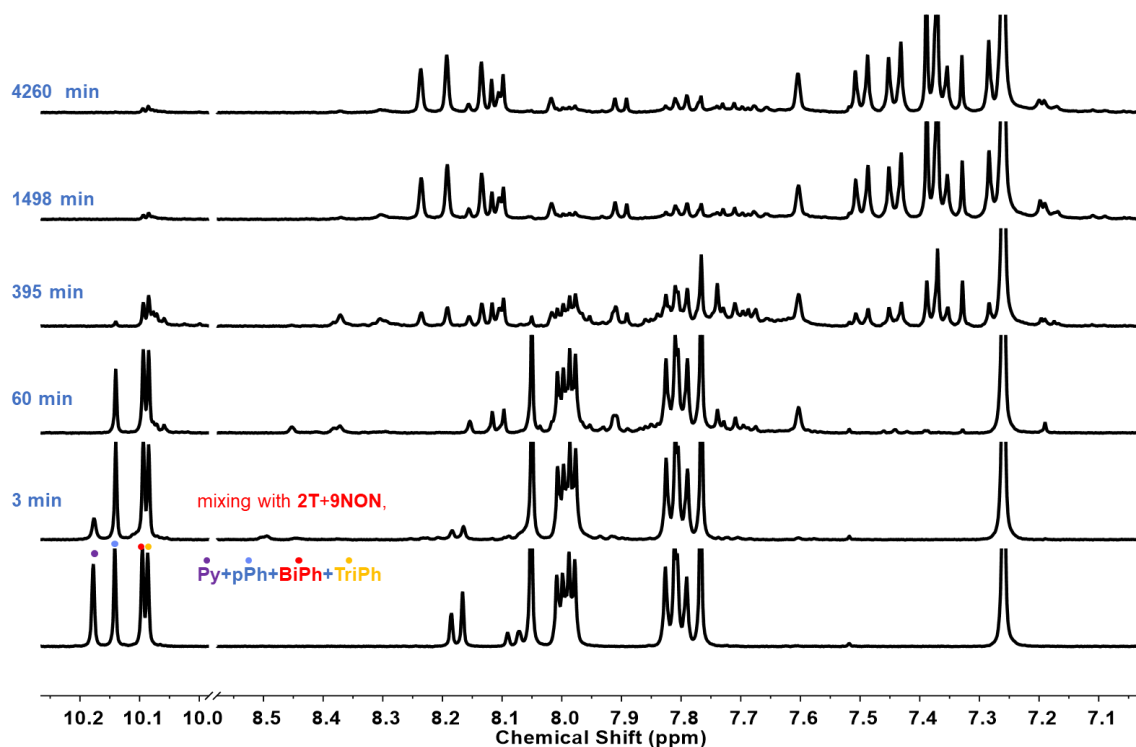

**Fig. S62** Temporal evolution of the  $^1\text{H}$  NMR (400MHz,  $\text{CDCl}_3$ ,  $40^\circ\text{C}$ ) spectra of  $3\text{Py} + 3\text{pPh} + 3\text{BiPh} + 3\text{TriPh} + 2\text{T} + 9\text{NON}$  ( $[\text{Py}]_0 = [\text{pPh}]_0 = [\text{BiPh}]_0 = [\text{TriPh}]_0 = 2.0 \text{ mM}$ ).



## 8. X-ray crystallography

Single crystal for the macrocycle **pPh<sub>2</sub>(NON)<sub>2</sub>** was obtained by slow evaporation of MeCN. Single crystal for **BiPh<sub>2</sub>(NON)** was obtained by slow vapor diffusion of n-Hexane into a CDCl<sub>3</sub> solution of the macrocycle. The single crystal of **TriPh<sub>3</sub>T<sub>2</sub>** was obtained from the reaction solution of 3**TriPh**+2**T** at 4 °C in CHCl<sub>3</sub>. CCDC numbers: 2006765, 2006766 and 2018494, respectively.

Both macrocyclic structures revealed a C<sub>2</sub>-symmetry enforced by intramolecular  $\pi \cdots \pi$  interactions, with the shortest C<sub>ar</sub> $\cdots$ C<sub>ar</sub> distance of 3.840 Å and 3.585 Å, respectively. Despite the long distances between the oxygen atoms -d<sub>O $\cdots$ O</sub>= 10.584 and 15.116 Å for **pPh<sub>2</sub>(NON)<sub>2</sub>** and **BiPh<sub>2</sub>(NON)<sub>2</sub>**- no solvent molecules were observed within the cavity. A water molecule was found to be interacting with the lone pair of the N atoms (imino groups) in **pPh<sub>2</sub>(NON)<sub>2</sub>**, with a N $\cdots$ O<sub>water</sub> distance of 2.896 Å. The **TriPh<sub>3</sub>T<sub>2</sub>** molecular structure showed a distorted D<sub>3</sub> symmetry and the aromatic bridging units were also interacting through  $\pi \cdots \pi$  forces (shortest C $\cdots$ C distance = 3.425 Å). These intramolecular interactions were likely compressing the 3D-conformation of the cyclic species and thus reducing the cavity void, hampering the encapsulation of guest molecules.

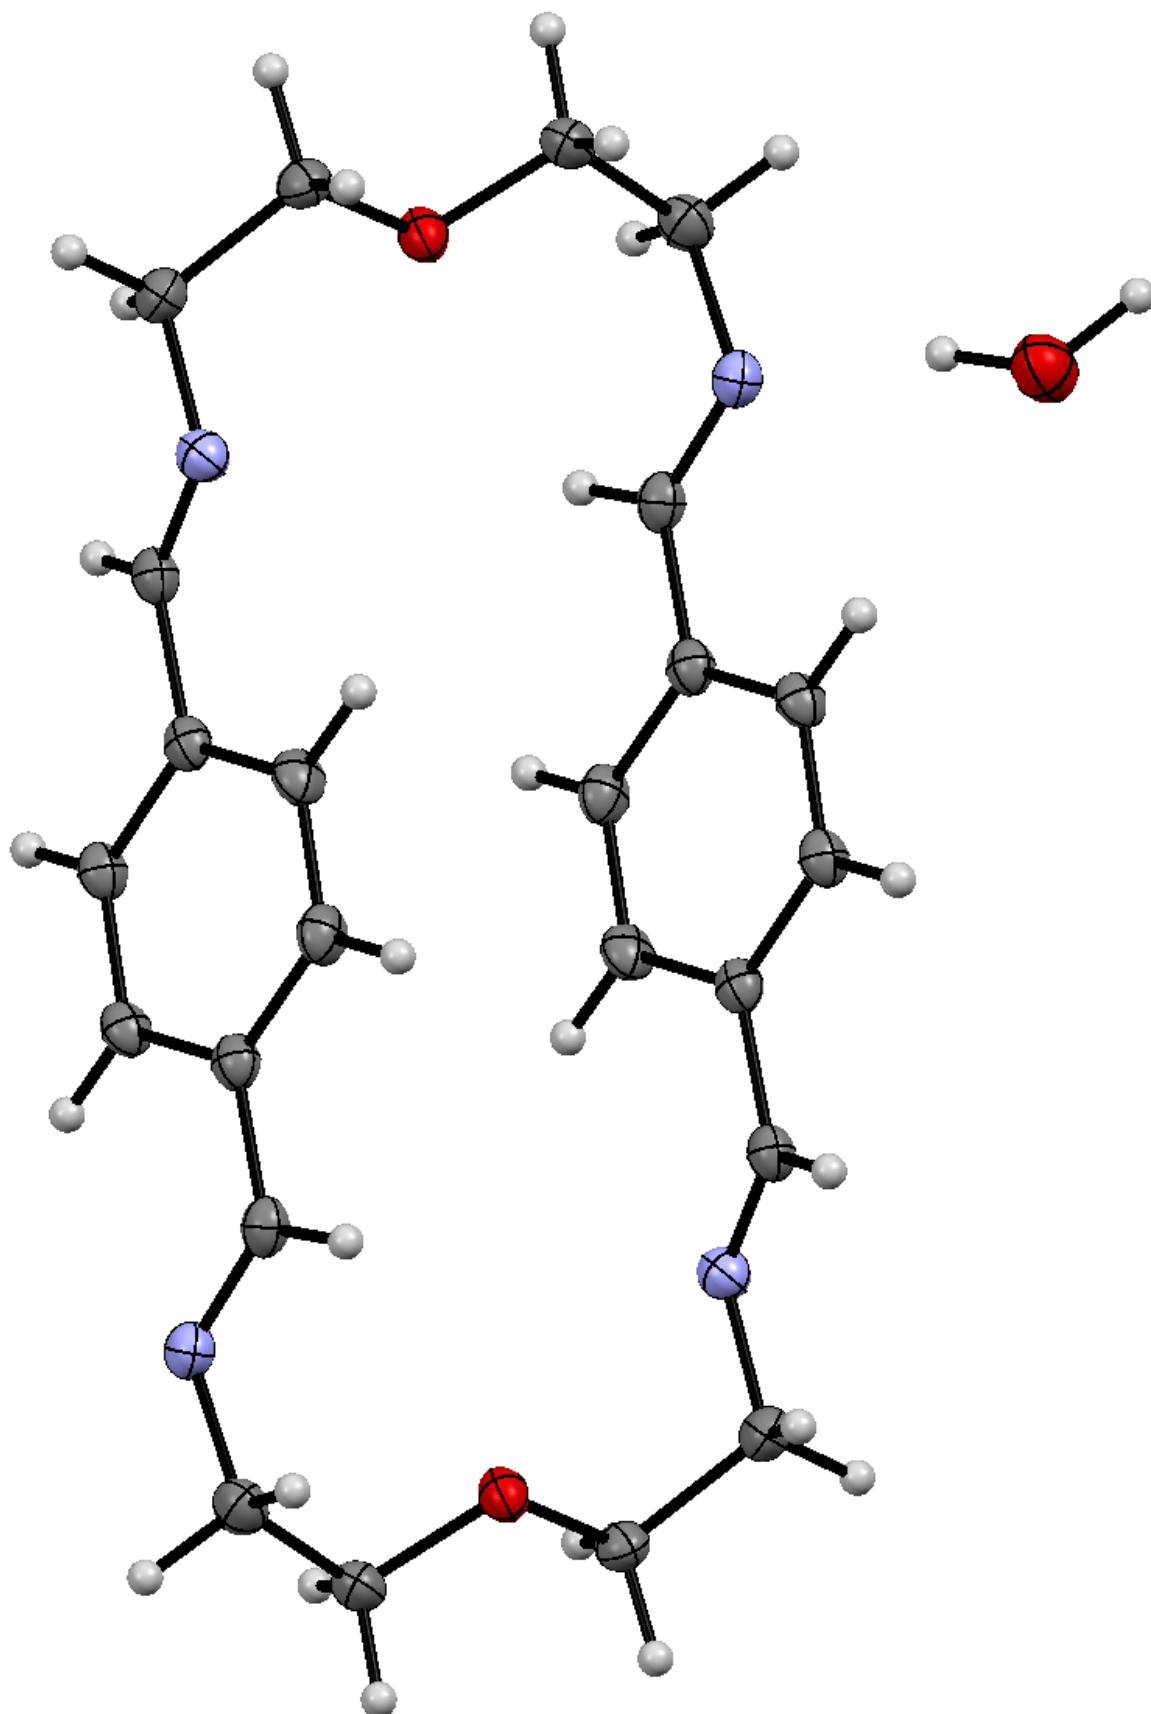

**Fig. S63** Thermal ellipsoid plot for Macrocycle  $\text{pPh}_2(\text{NON})_2 \cdot \text{H}_2\text{O}$ . Ellipsoids at 50% probability. Color scheme: carbon (grey), hydrogen (white), nitrogen (blue), oxygen (red).

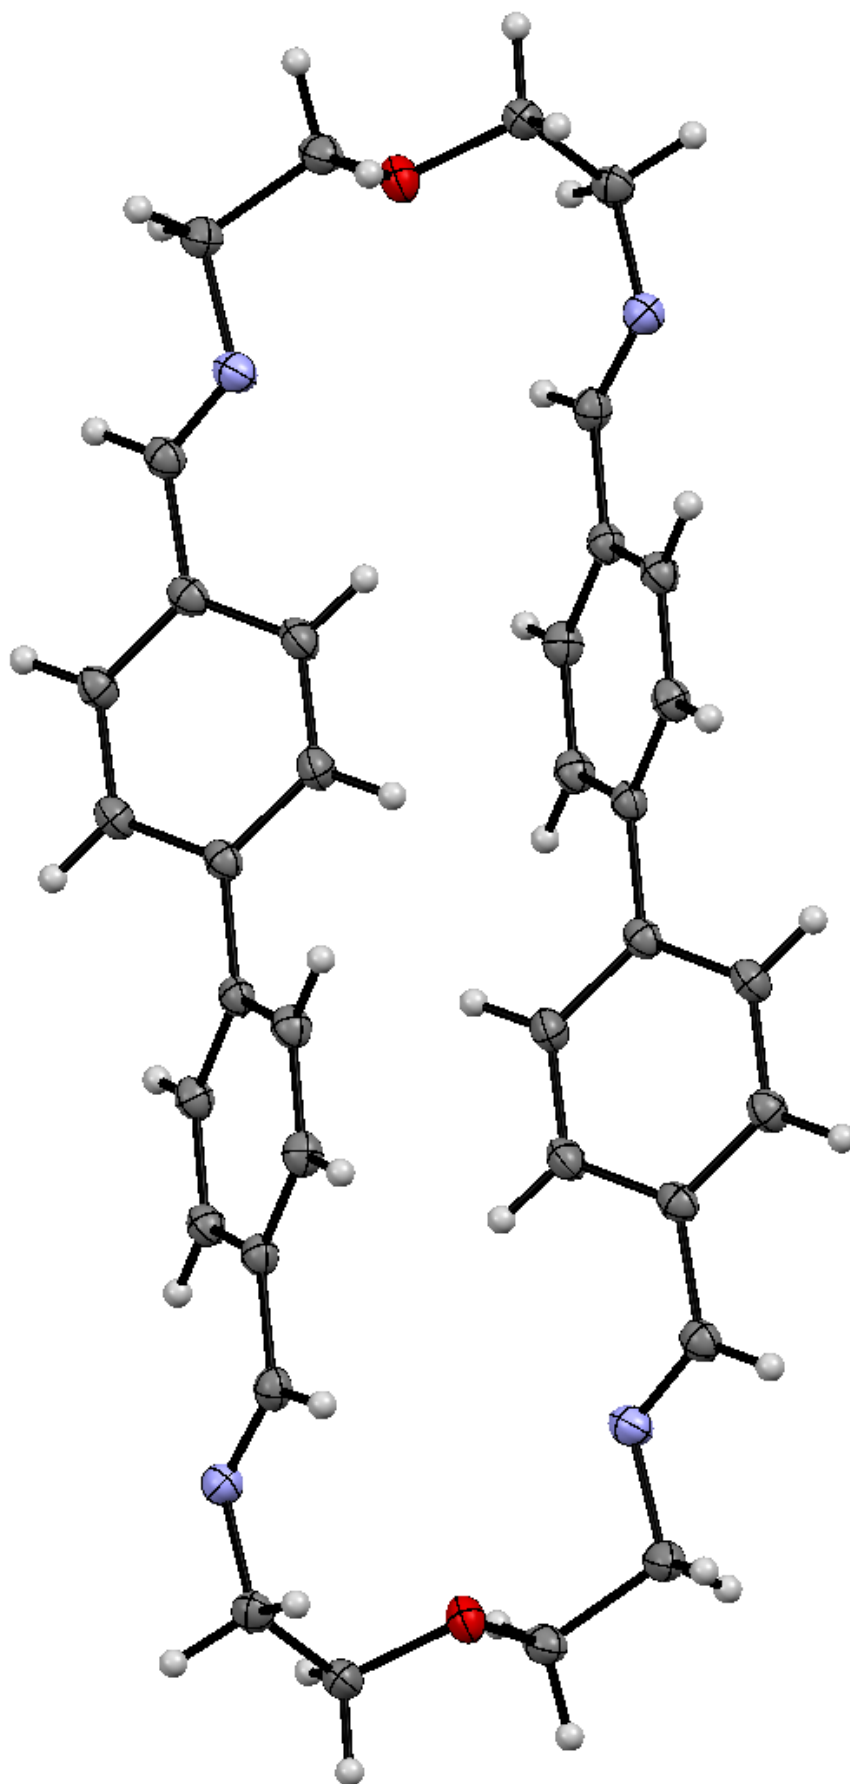

**Fig. S64** Thermal ellipsoid plot for Macrocycle **BiPh<sub>2</sub>(NON)<sub>2</sub>**. Ellipsoids at 50% probability. Color scheme: carbon (grey), hydrogen (white), nitrogen (blue), oxygen (red).

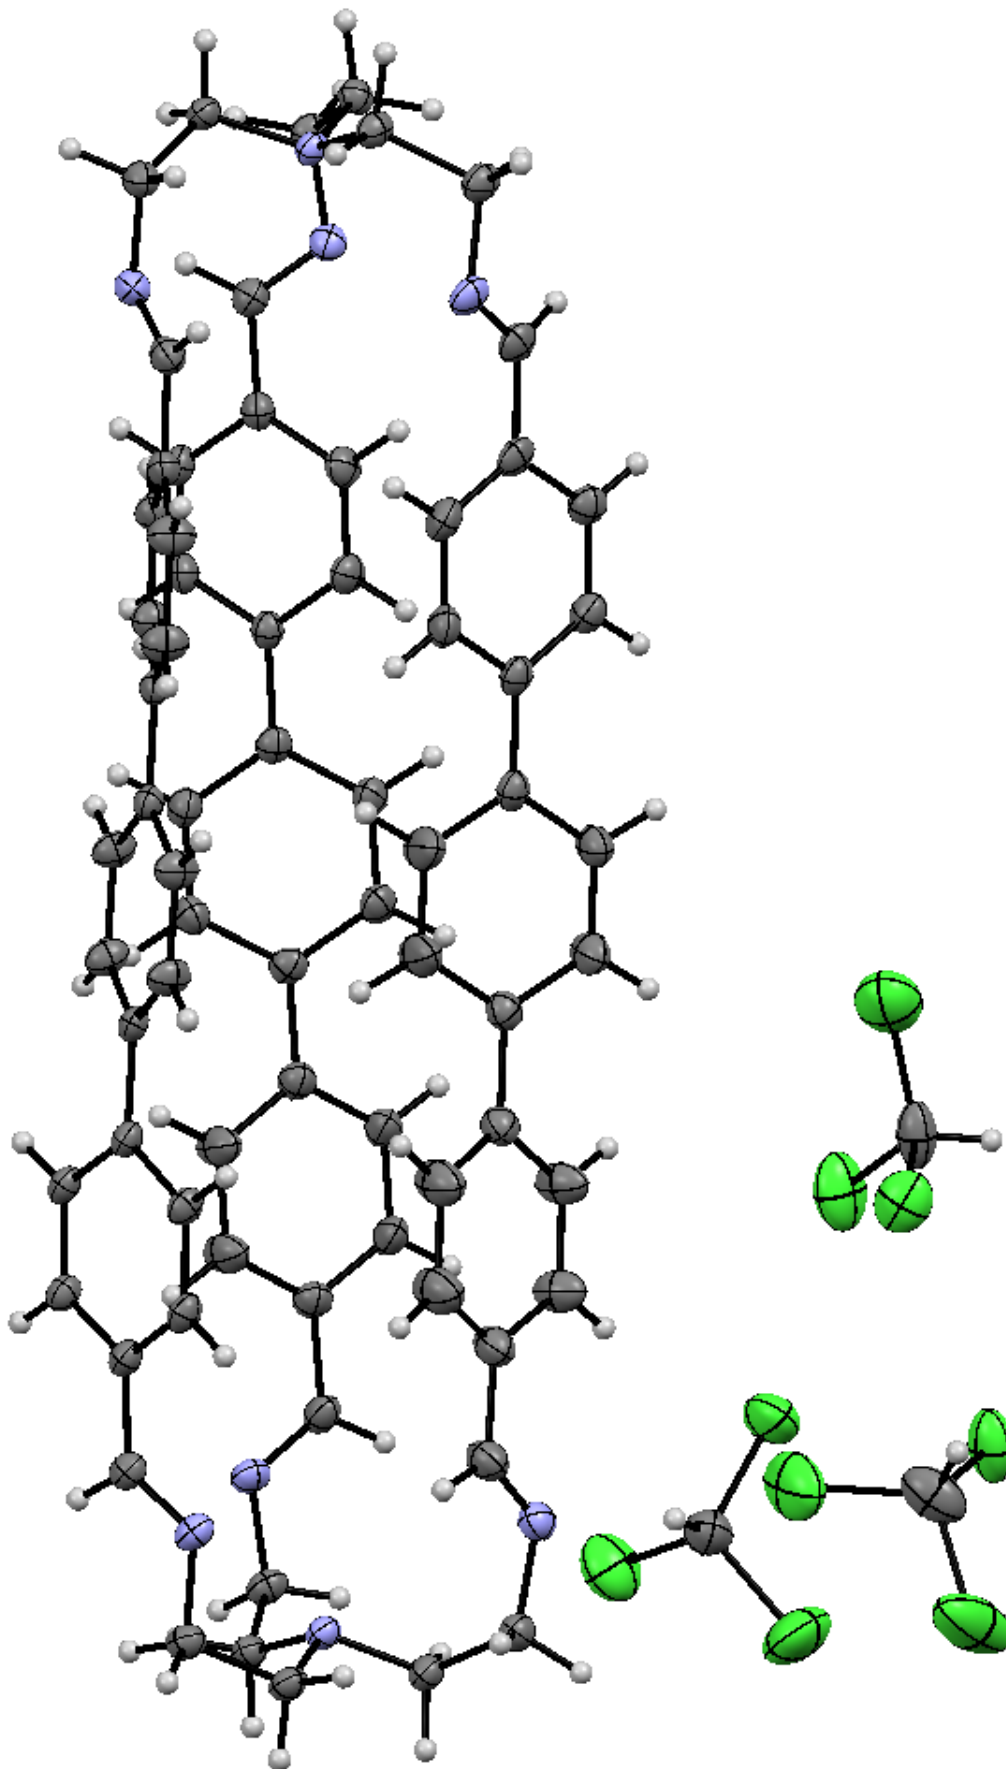

**Fig. S65** Thermal ellipsoid plot for Macrobicyclic cage  $\text{TriPh}_3\text{T}_2 \cdot 3\text{CHCl}_3$ . Ellipsoids at 50% probability. Color scheme: carbon (grey), hydrogen (white), nitrogen (blue), chlorine (green).

**Table S9** Crystal data and structure refinement for **pPh<sub>2</sub>(NON)<sub>2</sub>**, **BiPh<sub>2</sub>(NON)<sub>2</sub>** and **TriPh<sub>3</sub>T<sub>2</sub>**

| Identification code                         | <b>pPh<sub>2</sub>(NON)<sub>2</sub>·H<sub>2</sub>O</b>                          | <b>BiPh<sub>2</sub>(NON)<sub>2</sub></b>                      | <b>TriPh<sub>3</sub>T<sub>2</sub>·3CHCl<sub>3</sub></b>                |
|---------------------------------------------|---------------------------------------------------------------------------------|---------------------------------------------------------------|------------------------------------------------------------------------|
| Empirical formula                           | C <sub>24</sub> H <sub>28</sub> N <sub>4</sub> O <sub>2</sub> ·H <sub>2</sub> O | C <sub>36</sub> H <sub>36</sub> N <sub>4</sub> O <sub>2</sub> | C <sub>72</sub> H <sub>66</sub> N <sub>8</sub> , 3(CHCl <sub>3</sub> ) |
| Formula weight                              | 422.52                                                                          | 556.69                                                        | 1401.43                                                                |
| Temperature/K                               | 120(2)                                                                          | 120(2)                                                        | 120(2)                                                                 |
| Crystal system                              | orthorhombic                                                                    | triclinic                                                     | triclinic                                                              |
| Space group                                 | P c c n                                                                         | P- 1                                                          | P -1                                                                   |
| a/Å                                         | 16.0157(5)                                                                      | 8.9175(4)                                                     | 12.9054(10)                                                            |
| b/Å                                         | 16.9055(6)                                                                      | 9.6423(5)                                                     | 13.4545(11)                                                            |
| c/Å                                         | 8.2684(2)                                                                       | 10.4108(5)                                                    | 22.5621(18)                                                            |
| α/°                                         | 90                                                                              | 62.612(2)                                                     | 76.114(3)                                                              |
| β/°                                         | 90                                                                              | 67.462(2)                                                     | 82.526(3)                                                              |
| γ/°                                         | 90                                                                              | 72.983(2)                                                     | 62.714(3)                                                              |
| Volume/Å <sup>3</sup>                       | 2238.70(12)                                                                     | 726.71(6)                                                     | 3379.0(5)                                                              |
| Z                                           | 4                                                                               | 1                                                             | 2                                                                      |
| ρ <sub>calcd</sub> /g·cm <sup>-3</sup>      | 1.254                                                                           | 1.272                                                         | 1.377                                                                  |
| μ/mm <sup>-1</sup>                          | 0.084                                                                           | 0.080                                                         | 0.424                                                                  |
| F(000)                                      | 904                                                                             | 296                                                           | 1456                                                                   |
| Crystal size/mm <sup>3</sup>                | 0.120×0.140×0.160                                                               | 0.200×0.150×0.080                                             | 0.400×0.200×0.140                                                      |
| Radiation                                   | 0.71073                                                                         | 0.71073                                                       | 0.71073                                                                |
| 2θ range for data collection/°              | 2.410-28.012                                                                    | 2.304-30.008                                                  | 1.986-27.978                                                           |
| Index ranges                                | -21 ≤ h ≤ 21, -22 ≤ k ≤ 21, -10 ≤ l ≤ 10                                        | -11 ≤ h ≤ 12, -13 ≤ k ≤ 13, -14 ≤ l ≤ 14                      | -16 ≤ h ≤ 17, -17 ≤ k ≤ 17, -29 ≤ l ≤ 29                               |
| Reflections collected                       | 27088                                                                           | 27416                                                         | 147869                                                                 |
| Reflns. unique                              | 2703                                                                            | 4246                                                          | 16195                                                                  |
| Reflns. obsd.                               | 2311                                                                            | 3538                                                          | 12684                                                                  |
| R <sub>int</sub>                            | 0.0412                                                                          | 0.0341                                                        | 0.0546                                                                 |
| Params. refined                             | 145                                                                             | 190                                                           | 829                                                                    |
| Goodness-of-fit on F <sup>2</sup>           | 1.054                                                                           | 1.025                                                         | 1.031                                                                  |
| Final R indexes [I ≥ 2σ (I)]                | R <sub>1</sub> =0.0432, wR <sub>2</sub> = 0.1117                                | R <sub>1</sub> = 0.0394, wR <sub>2</sub> = 0.1026             | R <sub>1</sub> = 0.0659, wR <sub>2</sub> = 0.1778                      |
| Final R indexes [all data]                  | R <sub>1</sub> = 0.0513, wR <sub>2</sub> = 0.1168                               | R <sub>1</sub> = 0.0498, wR <sub>2</sub> = 0.1104             | R <sub>1</sub> = 0.0831, wR <sub>2</sub> = 0.1941                      |
| Largest diff. peak/hole / e Å <sup>-3</sup> | 0.350/-0.495                                                                    | 0.380/-0.189                                                  | 1.932/-1.456                                                           |

## 9. References

1. G. M. Sheldrick, *Acta Crystallogr., Sect. A: Found. Crystallogr.*, 2008, **64**, 112–122.
2. C. F. Macrae, I. J. Bruno, J. A. Chisholm, P. R. Edgington, P. McCabe, E. Pidcock, L. Rodriguez-Monge, R. Taylor, J. van de Streek, and P. A. Wood, *J. Appl. Crystallogr.*, 2008, **41**, 466–470.
3. N. Alzakhem, C. Bischof, M. Seitz, *Inorg. Chem.* **2012**, *51*, 9343–9349.
4. M. Kołodziejski, A. R. Stefankiewicz, J.-M. Lehn, *Chem. Sci.* **2019**, *10*, 1836–1843.
5. Z. Yang, J.-M. Lehn, *J. Am. Chem. Soc.* **2020**, *142*, 15137–15145.
6. M. J. Frisch, G. W. Trucks, H. B. Schlegel, G. E. Scuseria, M. A. Robb, J. R. Cheeseman, G. Scalmani, V. Barone, B. Mennucci, G. A. Petersson, et al., Gaussian 09, Revision B.01 (Gaussian, Inc), **2010**.
7. A. D. Becke, *J. Chem. Phys.* **1993**, *98*, 5648-5652.

## 10. Cartesian coordinates and energies

- Lowest energy conformation for **H<sub>2</sub>O**.

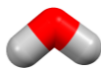

**Cartesian coordinates (3 atoms), E (298.15 K) = -76.44962 Hartree**

|   |   |         |        |        |
|---|---|---------|--------|--------|
| 1 | O | -5.0653 | 2.3918 | 0.1955 |
| 2 | H | -4.1039 | 2.4425 | 0.1955 |
| 3 | H | -5.3385 | 3.315  | 0.1955 |

- Lowest energy conformation for **NON**.

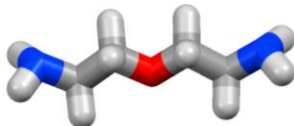

**Cartesian coordinates (19 atoms), E (298.15 K) = -344.317532 Hartree**

|    |   |         |        |         |
|----|---|---------|--------|---------|
| 1  | C | -1.6371 | 1.0687 | 0.0257  |
| 2  | H | -1.2072 | 0.062  | 0.0379  |
| 3  | H | -1.2046 | 1.5847 | -0.8376 |
| 4  | C | -1.201  | 1.7962 | 1.2928  |
| 5  | H | -1.6056 | 2.8194 | 1.2909  |
| 6  | H | -1.6092 | 1.2817 | 2.1756  |
| 7  | O | 0.2171  | 1.8189 | 1.3376  |
| 8  | C | 0.7381  | 2.481  | 2.4793  |
| 9  | H | 0.3931  | 1.9924 | 3.4028  |
| 10 | H | 0.3962  | 3.5263 | 2.5116  |
| 11 | C | 2.2609  | 2.4403 | 2.4142  |
| 12 | H | 2.5813  | 2.9126 | 1.4799  |
| 13 | H | 2.5789  | 1.3941 | 2.3626  |
| 14 | N | -3.1078 | 1.0252 | -0.0541 |
| 15 | H | -3.4333 | 1.4754 | -0.9008 |
| 16 | H | -3.4352 | 0.0678 | -0.0931 |
| 17 | N | 2.8369  | 3.1216 | 3.587   |
| 18 | H | 3.426   | 2.489  | 4.1143  |
| 19 | H | 3.4276  | 3.8917 | 3.2982  |

- Lowest energy conformation for **T**.

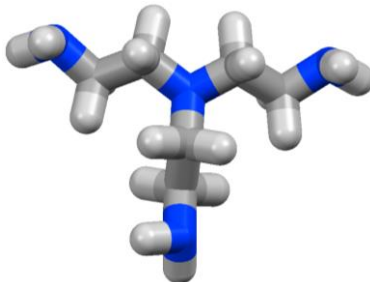

**Cartesian coordinates (28 atoms), E (298.15 K) = -458.367788 Hartree**

|   |   |         |         |         |
|---|---|---------|---------|---------|
| 1 | C | -1.7944 | 0.7755  | 0.2214  |
| 2 | H | -1.3583 | -0.1752 | 0.5415  |
| 3 | H | -1.4724 | 0.9438  | -0.8168 |
| 4 | C | -1.2514 | 1.883   | 1.1262  |

|    |   |         |         |         |
|----|---|---------|---------|---------|
| 5  | H | -1.7489 | 2.8372  | 0.864   |
| 6  | H | -1.5476 | 1.6446  | 2.1499  |
| 7  | C | 0.7569  | 2.6731  | 2.2574  |
| 8  | H | 0.203   | 2.3404  | 3.1377  |
| 9  | H | 0.6316  | 3.7723  | 2.1984  |
| 10 | C | 2.2337  | 2.3544  | 2.4962  |
| 11 | H | 2.826   | 2.6249  | 1.6091  |
| 12 | H | 2.3348  | 1.2735  | 2.6293  |
| 13 | N | -3.2559 | 0.6914  | 0.3691  |
| 14 | H | -3.6868 | 1.5073  | -0.0582 |
| 15 | H | -3.6044 | -0.1078 | -0.1516 |
| 16 | N | 2.6909  | 3.0211  | 3.7252  |
| 17 | H | 3.6404  | 2.7301  | 3.9373  |
| 18 | H | 2.7379  | 4.0249  | 3.5699  |
| 19 | N | 0.2067  | 2.003   | 1.0787  |
| 20 | C | 0.7035  | 2.5511  | -0.1932 |
| 21 | H | -0.1328 | 2.8669  | -0.8279 |
| 22 | H | 1.2954  | 3.4574  | -0.0026 |
| 23 | C | 1.5577  | 1.5601  | -0.9901 |
| 24 | H | 2.3965  | 1.2249  | -0.3621 |
| 25 | H | 0.9555  | 0.6742  | -1.2102 |
| 26 | N | 1.9707  | 2.1644  | -2.2654 |
| 27 | H | 2.6505  | 2.9     | -2.0898 |
| 28 | H | 2.4534  | 1.4731  | -2.8313 |

- Lowest energy conformation for **pPh**.

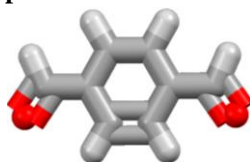

**Cartesian coordinates (16 atoms), E (298.15 K) = -458.936582 Hartree**

|    |   |         |        |         |
|----|---|---------|--------|---------|
| 1  | C | -3.314  | 2.2748 | 0.0002  |
| 2  | C | -1.9231 | 2.2747 | 0.0006  |
| 3  | C | -1.2268 | 3.4867 | 0.0001  |
| 4  | C | -1.9269 | 4.704  | -0.001  |
| 5  | C | -3.3099 | 4.704  | -0.0015 |
| 6  | C | -4.0102 | 3.4869 | -0.0009 |
| 7  | H | -3.8624 | 1.3389 | 0.0006  |
| 8  | H | -1.3748 | 1.3388 | 0.0014  |
| 9  | H | -1.3645 | 5.6297 | -0.0014 |
| 10 | H | -3.8722 | 5.6299 | -0.0023 |
| 11 | C | -5.4932 | 3.4749 | -0.0012 |
| 12 | H | -5.9477 | 2.4638 | -0.0007 |
| 13 | C | 0.2562  | 3.4746 | 0.0007  |
| 14 | H | 0.7106  | 2.4634 | 0.0015  |
| 15 | O | -6.1869 | 4.4681 | -0.0019 |
| 16 | O | 0.95    | 4.4677 | 0.0004  |



- Lowest energy conformation for **BiPh**.

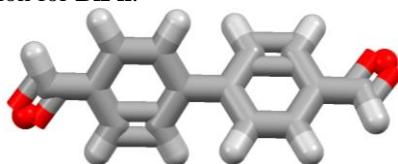

**Cartesian coordinates (26 atoms), E (298.15 K) = -689.976039 Hartree**

|    |   |         |         |         |
|----|---|---------|---------|---------|
| 1  | C | -2.6353 | 0.6156  | 0.0278  |
| 2  | H | -3.6928 | 0.538   | -0.2979 |
| 3  | O | -2.1622 | 1.6877  | 0.3428  |
| 4  | C | -1.8999 | -0.6654 | 0.0359  |
| 5  | C | -2.5497 | -1.8434 | -0.3464 |
| 6  | C | -0.5542 | -0.7175 | 0.4228  |
| 7  | C | -1.8696 | -3.0544 | -0.343  |
| 8  | H | -3.5898 | -1.8078 | -0.6541 |
| 9  | C | 0.1247  | -1.9245 | 0.4227  |
| 10 | H | -0.0613 | 0.1983  | 0.7264  |
| 11 | C | -0.5205 | -3.1157 | 0.0399  |
| 12 | H | -2.3796 | -3.9548 | -0.6631 |
| 13 | H | 1.1584  | -1.9555 | 0.7454  |
| 14 | C | 0.2099  | -4.4061 | 0.0402  |
| 15 | C | 1.5586  | -4.468  | -0.344  |
| 16 | C | -0.435  | -5.597  | 0.4249  |
| 17 | C | 2.2385  | -5.6791 | -0.347  |
| 18 | H | 2.0684  | -3.568  | -0.6655 |
| 19 | C | 0.2436  | -6.804  | 0.4255  |
| 20 | H | -1.4684 | -5.5654 | 0.7485  |
| 21 | C | 1.589   | -6.8566 | 0.0371  |
| 22 | H | 3.2782  | -5.7152 | -0.6559 |
| 23 | H | -0.249  | -7.7194 | 0.7307  |
| 24 | C | 2.3242  | -8.1377 | 0.0296  |
| 25 | H | 3.3812  | -8.0607 | -0.2977 |
| 26 | O | 1.8514  | -9.2094 | 0.3467  |

- Lowest energy conformation for **(pPh)<sub>2</sub>NON<sub>2</sub>**.

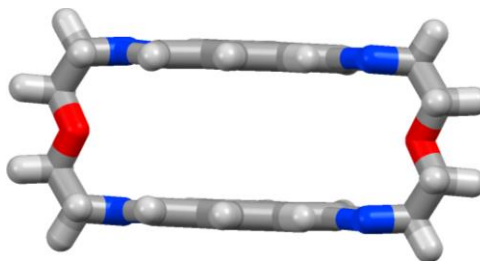

**Cartesian coordinates (58 atoms), E (298.15 K) = -1300.716382 Hartree**

|   |   |         |         |        |
|---|---|---------|---------|--------|
| 1 | C | 10.0912 | 7.8671  | 5.9351 |
| 2 | C | 10.141  | 9.2564  | 5.7445 |
| 3 | H | 9.9422  | 9.9162  | 6.5828 |
| 4 | C | 10.431  | 9.7935  | 4.4991 |
| 5 | H | 10.4634 | 10.8651 | 4.3479 |

|    |   |         |         |         |
|----|---|---------|---------|---------|
| 6  | C | 10.6738 | 8.9501  | 3.4065  |
| 7  | C | 10.629  | 7.5607  | 3.5983  |
| 8  | H | 10.8125 | 6.901   | 2.7563  |
| 9  | C | 10.3448 | 7.0237  | 4.8449  |
| 10 | H | 10.3031 | 5.952   | 4.9942  |
| 11 | C | 10.955  | 9.4855  | 2.0636  |
| 12 | H | 11.0678 | 8.7317  | 1.2705  |
| 13 | C | 11.3116 | 11.1374 | 0.4491  |
| 14 | H | 11.4099 | 10.2817 | -0.2359 |
| 15 | H | 12.2511 | 11.7015 | 0.4265  |
| 16 | C | 10.2096 | 12.059  | -0.055  |
| 17 | H | 10.0633 | 12.8833 | 0.6563  |
| 18 | H | 10.5064 | 12.489  | -1.0234 |
| 19 | C | 8.1163  | 4.802   | 8.8398  |
| 20 | H | 8.261   | 3.9826  | 8.1226  |
| 21 | H | 7.9534  | 4.363   | 9.8355  |
| 22 | C | 9.3594  | 5.681   | 8.8712  |
| 23 | H | 9.1789  | 6.5375  | 9.5382  |
| 24 | H | 10.1764 | 5.0854  | 9.2941  |
| 25 | C | 9.7559  | 7.3319  | 7.2656  |
| 26 | H | 9.512   | 8.0858  | 8.0285  |
| 27 | N | 11.0601 | 10.7274 | 1.8198  |
| 28 | N | 9.7404  | 6.0899  | 7.5303  |
| 29 | O | 9.013   | 11.3094 | -0.193  |
| 30 | C | 5.9242  | 9.0375  | 2.3328  |
| 31 | C | 5.8734  | 7.6483  | 2.5242  |
| 32 | H | 6.0714  | 6.9879  | 1.6861  |
| 33 | C | 5.5834  | 7.1122  | 3.7699  |
| 34 | H | 5.5502  | 6.0406  | 3.9217  |
| 35 | C | 5.3417  | 7.9563  | 4.8622  |
| 36 | C | 5.3875  | 9.3456  | 4.6696  |
| 37 | H | 5.2048  | 10.0059 | 5.5113  |
| 38 | C | 5.6716  | 9.8817  | 3.4226  |
| 39 | H | 5.7141  | 10.9532 | 3.2727  |
| 40 | C | 5.0608  | 7.4218  | 6.2055  |
| 41 | H | 4.949   | 8.1762  | 6.9983  |
| 42 | C | 4.7042  | 5.771   | 7.8212  |
| 43 | H | 4.6076  | 6.627   | 8.506   |
| 44 | H | 3.764   | 5.2081  | 7.8449  |
| 45 | C | 5.8055  | 4.8481  | 8.3246  |
| 46 | H | 5.9501  | 4.0235  | 7.6133  |
| 47 | H | 5.509   | 4.4186  | 9.2933  |
| 48 | C | 7.8993  | 12.1021 | -0.5727 |
| 49 | H | 7.7532  | 12.9219 | 0.1438  |
| 50 | H | 8.0626  | 12.5406 | -1.5685 |
| 51 | C | 6.6572  | 11.2218 | -0.6043 |
| 52 | H | 6.839   | 10.3649 | -1.2705 |

|    |   |        |         |         |
|----|---|--------|---------|---------|
| 53 | H | 5.8398 | 11.8162 | -1.0283 |
| 54 | C | 6.2597 | 9.5718  | 1.0019  |
| 55 | H | 6.5034 | 8.8173  | 0.2395  |
| 56 | N | 4.9551 | 6.1801  | 6.4501  |
| 57 | N | 6.2757 | 10.8136 | 0.7366  |
| 58 | O | 7.0032 | 5.5962  | 8.4615  |

- Lowest energy conformation for **(BiPh)<sub>2</sub>NON<sub>2</sub>**.

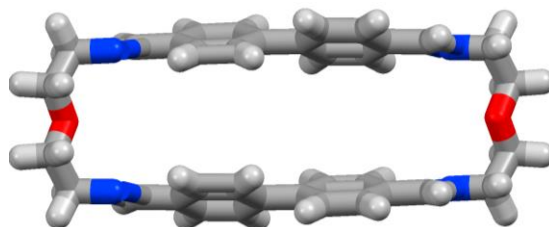

**Cartesian coordinates (78 atoms), E (298.15 K) = -1762.792149 Hartree**

|    |   |         |         |         |
|----|---|---------|---------|---------|
| 1  | C | 9.1691  | 4.2199  | 3.4964  |
| 2  | C | 9.2804  | 4.903   | 2.2703  |
| 3  | H | 8.3886  | 5.1139  | 1.6923  |
| 4  | C | 10.5059 | 5.3501  | 1.8043  |
| 5  | H | 10.5776 | 5.8876  | 0.867   |
| 6  | C | 11.6736 | 5.1414  | 2.5522  |
| 7  | C | 11.5718 | 4.463   | 3.7722  |
| 8  | H | 12.465  | 4.2876  | 4.3632  |
| 9  | C | 10.3437 | 4.0029  | 4.2326  |
| 10 | H | 10.3007 | 3.457   | 5.1674  |
| 11 | C | 12.9846 | 5.6309  | 2.0959  |
| 12 | H | 13.8009 | 5.5414  | 2.8282  |
| 13 | C | 14.5118 | 6.5978  | 0.6126  |
| 14 | H | 14.9147 | 5.9599  | -0.1834 |
| 15 | H | 15.2008 | 6.5469  | 1.4692  |
| 16 | C | 14.4685 | 8.0201  | 0.0747  |
| 17 | H | 15.4603 | 8.2968  | -0.3136 |
| 18 | H | 13.7491 | 8.0741  | -0.7539 |
| 19 | C | 13.8887 | 10.2333 | 0.6644  |
| 20 | H | 13.1723 | 10.2503 | -0.1684 |
| 21 | H | 14.8392 | 10.6583 | 0.3077  |
| 22 | C | 13.3516 | 11.08   | 1.8079  |
| 23 | H | 14.0438 | 11.0316 | 2.6621  |
| 24 | H | 13.3218 | 12.1189 | 1.4571  |
| 25 | C | 11.7387 | 10.471  | 3.3883  |
| 26 | H | 12.5044 | 10.5894 | 4.1696  |
| 27 | C | 10.4093 | 10.0579 | 3.8668  |
| 28 | C | 10.1489 | 10.0124 | 5.2411  |
| 29 | H | 10.9265 | 10.2963 | 5.943   |
| 30 | C | 8.9042  | 9.6195  | 5.7188  |
| 31 | H | 8.7236  | 9.6216  | 6.787   |
| 32 | C | 7.8506  | 3.7657  | 4.0003  |
| 33 | C | 8.1502  | 9.2884  | 3.4576  |

|    |   |         |         |        |
|----|---|---------|---------|--------|
| 34 | H | 7.3908  | 8.9727  | 2.7524 |
| 35 | C | 9.3862  | 9.6926  | 2.9801 |
| 36 | H | 9.5878  | 9.7117  | 1.9164 |
| 37 | N | 13.1779 | 6.1258  | 0.9424 |
| 38 | N | 11.9996 | 10.6837 | 2.1636 |
| 39 | O | 14.0808 | 8.9022  | 1.1163 |
| 40 | C | 6.5607  | 8.7872  | 5.342  |
| 41 | C | 6.4494  | 8.104   | 6.568  |
| 42 | H | 7.3411  | 7.893   | 7.146  |
| 43 | C | 5.2238  | 7.657   | 7.0341 |
| 44 | H | 5.1521  | 7.1194  | 7.9713 |
| 45 | C | 4.0562  | 7.8659  | 6.2862 |
| 46 | C | 4.158   | 8.5443  | 5.0663 |
| 47 | H | 3.2648  | 8.7198  | 4.4753 |
| 48 | C | 5.3861  | 9.0043  | 4.6058 |
| 49 | H | 5.4291  | 9.5503  | 3.6712 |
| 50 | C | 2.7452  | 7.3765  | 6.7425 |
| 51 | H | 1.9288  | 7.466   | 6.0102 |
| 52 | C | 1.218   | 6.4097  | 8.2259 |
| 53 | H | 0.815   | 7.0476  | 9.0219 |
| 54 | H | 0.5288  | 6.4606  | 7.3693 |
| 55 | C | 1.2612  | 4.9874  | 8.7638 |
| 56 | H | 0.2694  | 4.7107  | 9.1522 |
| 57 | H | 1.9806  | 4.9334  | 9.5924 |
| 58 | C | 1.841   | 2.7742  | 8.1742 |
| 59 | H | 2.5574  | 2.7573  | 9.007  |
| 60 | H | 0.8906  | 2.3491  | 8.5309 |
| 61 | C | 2.3782  | 1.9274  | 7.0307 |
| 62 | H | 1.686   | 1.9757  | 6.1765 |
| 63 | H | 2.4081  | 0.8886  | 7.3816 |
| 64 | C | 3.9912  | 2.5361  | 5.4503 |
| 65 | H | 3.2256  | 2.4174  | 4.669  |
| 66 | C | 5.3206  | 2.9492  | 4.9718 |
| 67 | C | 5.581   | 2.9946  | 3.5974 |
| 68 | H | 4.8033  | 2.7107  | 2.8956 |
| 69 | C | 6.8257  | 3.3875  | 3.1197 |
| 70 | H | 7.0062  | 3.3854  | 2.0515 |
| 71 | C | 7.8792  | 9.2414  | 4.8382 |
| 72 | C | 7.5797  | 3.7188  | 5.3809 |
| 73 | H | 8.3391  | 4.0345  | 6.0861 |
| 74 | C | 6.3437  | 3.3145  | 5.8584 |
| 75 | H | 6.1421  | 3.2955  | 6.9222 |
| 76 | N | 2.5518  | 6.8816  | 7.8961 |
| 77 | N | 3.7302  | 2.3239  | 6.675  |
| 78 | O | 1.6487  | 4.1052  | 7.7222 |

- Lowest energy conformation for (pPh)(BiPh)NON<sub>2</sub>.

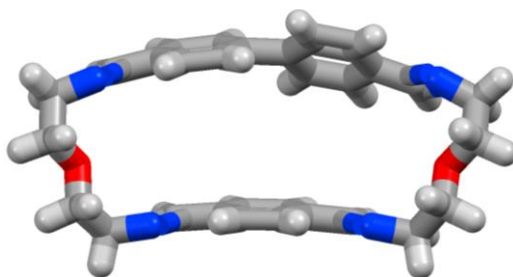

Cartesian coordinates (68 atoms), E (298.15 K) = -1531.745179 Hartree

|    |   |         |         |         |
|----|---|---------|---------|---------|
| 1  | C | -1.5071 | 3.4309  | -1.3185 |
| 2  | C | -2.8845 | 3.2619  | -1.2319 |
| 3  | C | -3.4876 | 2.91    | -0.0188 |
| 4  | C | -2.6822 | 2.7953  | 1.1227  |
| 5  | C | -1.3112 | 2.9576  | 1.0348  |
| 6  | C | -0.6885 | 3.2413  | -0.1951 |
| 7  | C | -4.9117 | 2.5461  | 0.0234  |
| 8  | C | 0.7885  | 3.2012  | -0.2952 |
| 9  | N | -5.4964 | 2.2012  | 1.0967  |
| 10 | O | -6.0508 | -0.5517 | 0.6242  |
| 11 | N | -3.6664 | -2.4899 | 0.3596  |
| 12 | C | -6.8446 | 1.6763  | 1.0048  |
| 13 | C | -6.8608 | 0.2301  | 1.4888  |
| 14 | C | -5.9987 | -1.9184 | 1.0049  |
| 15 | C | -5.0788 | -2.6769 | 0.0591  |
| 16 | N | 3.5381  | -2.5223 | 0.7234  |
| 17 | O | 5.984   | -0.6201 | 0.782   |
| 18 | N | 5.6684  | 2.2486  | 0.7454  |
| 19 | C | 4.9615  | -2.7844 | 0.5664  |
| 20 | C | 5.8438  | -1.8818 | 1.4188  |
| 21 | C | 6.8623  | 0.2561  | 1.4727  |
| 22 | C | 6.9505  | 1.5697  | 0.7002  |
| 23 | C | 4.9594  | 2.2361  | -0.3087 |
| 24 | C | 2.8583  | -2.2809 | -0.3228 |
| 25 | C | 2.7782  | 2.4415  | -1.461  |
| 26 | C | 1.4091  | 2.678   | -1.4388 |
| 27 | C | 1.6059  | 3.5566  | 0.7946  |
| 28 | C | 2.9675  | 3.308   | 0.7787  |
| 29 | C | 3.5684  | 2.709   | -0.3381 |
| 30 | C | -0.6516 | -1.8793 | -1.6112 |
| 31 | C | 0.7378  | -1.9075 | -1.5461 |
| 32 | C | 1.3903  | -2.1418 | -0.3305 |
| 33 | C | 0.6147  | -2.3157 | 0.8302  |
| 34 | C | -0.768  | -2.2948 | 0.7642  |
| 35 | C | -1.4238 | -2.0932 | -0.4637 |
| 36 | C | -2.89   | -2.1783 | -0.5968 |
| 37 | H | -1.0629 | 3.6914  | -2.272  |
| 38 | H | -3.496  | 3.3753  | -2.1215 |

|    |   |         |         |         |
|----|---|---------|---------|---------|
| 39 | H | -3.1481 | 2.5193  | 2.06    |
| 40 | H | -0.7038 | 2.7919  | 1.9161  |
| 41 | H | -5.4283 | 2.5289  | -0.9476 |
| 42 | H | -7.2491 | 1.7249  | -0.0177 |
| 43 | H | -7.502  | 2.2552  | 1.6631  |
| 44 | H | -7.8952 | -0.1452 | 1.4906  |
| 45 | H | -6.4755 | 0.1809  | 2.5164  |
| 46 | H | -5.6313 | -2.0177 | 2.0354  |
| 47 | H | -7.0062 | -2.358  | 0.9573  |
| 48 | H | -5.2931 | -3.7448 | 0.188   |
| 49 | H | -5.3296 | -2.4079 | -0.978  |
| 50 | H | 5.1328  | -3.8147 | 0.8995  |
| 51 | H | 5.2912  | -2.7108 | -0.4809 |
| 52 | H | 5.4046  | -1.7645 | 2.4189  |
| 53 | H | 6.8316  | -2.3525 | 1.5319  |
| 54 | H | 6.4914  | 0.4476  | 2.4888  |
| 55 | H | 7.8643  | -0.1914 | 1.5494  |
| 56 | H | 7.7069  | 2.1966  | 1.183   |
| 57 | H | 7.2801  | 1.3558  | -0.3277 |
| 58 | H | 5.3301  | 1.7998  | -1.2475 |
| 59 | H | 3.3353  | -2.2116 | -1.3118 |
| 60 | H | 3.2299  | 1.9867  | -2.3366 |
| 61 | H | 0.808   | 2.3842  | -2.2905 |
| 62 | H | 1.1605  | 4.0085  | 1.673   |
| 63 | H | 3.5809  | 3.5358  | 1.6415  |
| 64 | H | -1.1434 | -1.715  | -2.5643 |
| 65 | H | 1.3231  | -1.7677 | -2.4489 |
| 66 | H | 1.1215  | -2.4918 | 1.771   |
| 67 | H | -1.3665 | -2.4563 | 1.6523  |
| 68 | H | -3.2746 | -2.001  | -1.6122 |

- Lowest energy conformation for **pPh<sub>3</sub>T<sub>2</sub>**.

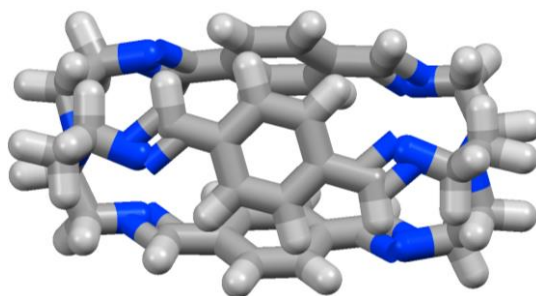

**Cartesian coordinates (86 atoms), E (298.15 K) = -1834.844653 Hartree**

|   |   |        |         |         |
|---|---|--------|---------|---------|
| 1 | C | 4.6022 | 10.184  | -1.6052 |
| 2 | H | 4.9772 | 11.0786 | -1.1067 |
| 3 | H | 4.6412 | 10.3849 | -2.693  |
| 4 | C | 5.5888 | 9.0519  | -1.2936 |
| 5 | H | 5.2697 | 8.1022  | -1.747  |
| 6 | H | 6.5371 | 9.33    | -1.7703 |
| 7 | C | 5.7349 | 7.7616  | 0.6483  |

|    |   |        |         |         |
|----|---|--------|---------|---------|
| 8  | H | 5.456  | 6.8857  | 0.0443  |
| 9  | C | 5.9488 | 7.493   | 2.0806  |
| 10 | C | 5.7589 | 6.1931  | 2.5735  |
| 11 | H | 5.5081 | 5.3951  | 1.8825  |
| 12 | C | 5.8548 | 5.9249  | 3.9309  |
| 13 | H | 5.6811 | 4.928   | 4.316   |
| 14 | C | 6.147  | 6.9546  | 4.8344  |
| 15 | C | 6.3922 | 8.2425  | 4.3349  |
| 16 | H | 6.6328 | 9.0421  | 5.0271  |
| 17 | C | 6.2925 | 8.5115  | 2.9787  |
| 18 | H | 6.4493 | 9.5118  | 2.5959  |
| 19 | C | 6.1614 | 6.737   | 6.2904  |
| 20 | H | 6.4433 | 7.6149  | 6.8895  |
| 21 | C | 5.9136 | 5.5616  | 8.2905  |
| 22 | H | 6.2146 | 6.5205  | 8.7365  |
| 23 | H | 6.6879 | 4.8303  | 8.5534  |
| 24 | C | 4.6064 | 5.0449  | 8.9047  |
| 25 | H | 4.3546 | 4.1197  | 8.3851  |
| 26 | H | 4.8062 | 4.7743  | 9.9592  |
| 27 | C | 2.4665 | 11.2146 | -1.1324 |
| 28 | H | 1.4049 | 10.9781 | -1.0516 |
| 29 | H | 2.5973 | 11.7761 | -2.0772 |
| 30 | C | 2.8042 | 12.1533 | 0.032   |
| 31 | H | 3.871  | 12.4203 | 0.0383  |
| 32 | H | 2.2444 | 13.0799 | -0.1469 |
| 33 | C | 3.2112 | 11.606  | 2.2649  |
| 34 | H | 4.2399 | 11.9697 | 2.1265  |
| 35 | C | 2.9076 | 11.0885 | 3.6092  |
| 36 | C | 3.926  | 11.0461 | 4.5734  |
| 37 | H | 4.9053 | 11.4436 | 4.3279  |
| 38 | C | 3.7062 | 10.4735 | 5.8172  |
| 39 | H | 4.4997 | 10.4135 | 6.5512  |
| 40 | C | 2.4538 | 9.9306  | 6.1316  |
| 41 | C | 1.4195 | 10.0263 | 5.1887  |
| 42 | H | 0.4427 | 9.622   | 5.4316  |
| 43 | C | 1.6404 | 10.5944 | 3.9436  |
| 44 | H | 0.8511 | 10.6407 | 3.2042  |
| 45 | C | 2.2035 | 9.2251  | 7.3992  |
| 46 | H | 1.1705 | 8.8758  | 7.5414  |
| 47 | C | 2.7113 | 8.2912  | 9.4756  |
| 48 | H | 1.6482 | 8.0105  | 9.4601  |
| 49 | H | 2.8489 | 8.9744  | 10.3227 |
| 50 | C | 3.6061 | 7.0764  | 9.7504  |
| 51 | H | 4.6384 | 7.426   | 9.7104  |
| 52 | H | 3.4228 | 6.7423  | 10.7895 |
| 53 | C | 2.5546 | 8.9718  | -2.0311 |
| 54 | H | 3.2538 | 8.1583  | -2.2278 |

|    |   |         |         |         |
|----|---|---------|---------|---------|
| 55 | H | 2.3013  | 9.4182  | -3.0118 |
| 56 | C | 1.2841  | 8.3391  | -1.4518 |
| 57 | H | 0.5313  | 9.1013  | -1.2037 |
| 58 | H | 0.8573  | 7.7176  | -2.249  |
| 59 | C | 0.9043  | 7.6473  | 0.7447  |
| 60 | H | 0.148   | 8.4418  | 0.8229  |
| 61 | C | 1.0896  | 6.8389  | 1.9611  |
| 62 | C | 2.0276  | 5.8006  | 2.0229  |
| 63 | H | 2.6006  | 5.5634  | 1.1358  |
| 64 | C | 2.2349  | 5.117   | 3.211   |
| 65 | H | 2.9806  | 4.3308  | 3.2575  |
| 66 | C | 1.5189  | 5.4515  | 4.3701  |
| 67 | C | 0.5454  | 6.4563  | 4.2955  |
| 68 | H | -0.017  | 6.7054  | 5.1863  |
| 69 | C | 0.335   | 7.137   | 3.1058  |
| 70 | H | -0.4043 | 7.9299  | 3.0616  |
| 71 | C | 1.8446  | 4.7706  | 5.6342  |
| 72 | H | 2.6109  | 3.9858  | 5.5563  |
| 73 | C | 1.7356  | 4.3173  | 7.9205  |
| 74 | H | 2.4994  | 3.5658  | 7.6738  |
| 75 | H | 0.8627  | 3.7732  | 8.3016  |
| 76 | C | 2.2019  | 5.2364  | 9.0565  |
| 77 | H | 1.4109  | 5.9698  | 9.2177  |
| 78 | H | 2.2707  | 4.6323  | 9.9814  |
| 79 | N | 3.2199  | 9.9542  | -1.1651 |
| 80 | N | 3.4583  | 5.9572  | 8.8095  |
| 81 | N | 5.8367  | 8.9176  | 0.1318  |
| 82 | N | 5.8547  | 5.6331  | 6.8395  |
| 83 | N | 2.3705  | 11.6196 | 1.3128  |
| 84 | N | 3.1015  | 9.0043  | 8.2702  |
| 85 | N | 1.5692  | 7.4691  | -0.323  |
| 86 | N | 1.3107  | 5.0648  | 6.7488  |

- Lowest energy conformation for **BiPh<sub>3</sub>T<sub>2</sub>**.

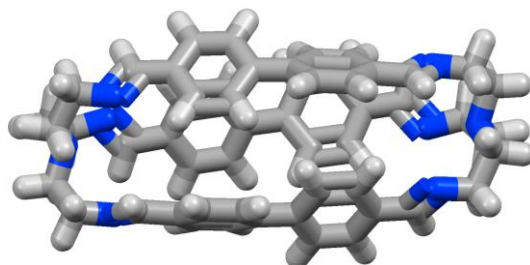

**Cartesian coordinates (116 atoms), E (298.15 K) = -2527.95297 Hartree**

|   |   |        |         |         |
|---|---|--------|---------|---------|
| 1 | C | 4.8585 | 12.1083 | -5.4195 |
| 2 | H | 5.0725 | 13.012  | -4.8482 |
| 3 | H | 4.9385 | 12.3808 | -6.4903 |
| 4 | C | 5.9748 | 11.106  | -5.1039 |
| 5 | H | 5.8518 | 10.1721 | -5.6715 |
| 6 | H | 6.907  | 11.5677 | -5.4527 |



|    |   |        |         |         |
|----|---|--------|---------|---------|
| 7  | C | 6.118  | 9.6497  | -3.2896 |
| 8  | H | 6.0132 | 8.8196  | -4.0042 |
| 9  | C | 6.2565 | 9.2412  | -1.8831 |
| 10 | C | 6.2641 | 7.8784  | -1.5619 |
| 11 | H | 6.2023 | 7.1422  | -2.3571 |
| 12 | C | 6.344  | 7.4566  | -0.24   |
| 13 | H | 6.3587 | 6.3957  | -0.0197 |
| 14 | C | 6.4166 | 8.3855  | 0.8085  |
| 15 | C | 6.4368 | 9.7524  | 0.4764  |
| 16 | H | 6.4696 | 10.4925 | 1.2668  |
| 17 | C | 6.3572 | 10.1734 | -0.8413 |
| 18 | H | 6.3448 | 11.2287 | -1.0825 |
| 19 | C | 6.4302 | 7.9446  | 2.2238  |
| 20 | C | 5.6652 | 6.8381  | 2.6355  |
| 21 | H | 5.0535 | 6.3137  | 1.9117  |
| 22 | C | 5.6339 | 6.4379  | 3.961   |
| 23 | H | 5.0216 | 5.6002  | 4.2691  |
| 24 | C | 6.3653 | 7.1334  | 4.9336  |
| 25 | C | 7.134  | 8.2325  | 4.5312  |
| 26 | H | 7.7134 | 8.7784  | 5.2691  |
| 27 | C | 7.1703 | 8.6297  | 3.1988  |
| 28 | H | 7.7901 | 9.4711  | 2.9113  |
| 29 | C | 6.3334 | 6.7459  | 6.3533  |
| 30 | H | 6.8512 | 7.4357  | 7.037   |
| 31 | C | 5.8278 | 5.4186  | 8.2056  |
| 32 | H | 6.2688 | 6.2555  | 8.7664  |
| 33 | H | 6.4954 | 4.559   | 8.3472  |
| 34 | C | 4.4708 | 5.0011  | 8.7827  |
| 35 | H | 4.1354 | 4.1372  | 8.2081  |
| 36 | H | 4.6349 | 4.6509  | 9.8209  |
| 37 | C | 2.5637 | 12.8009 | -5.1213 |
| 38 | H | 1.5481 | 12.4092 | -5.0611 |
| 39 | H | 2.639  | 13.3492 | -6.0808 |
| 40 | C | 2.717  | 13.8173 | -3.9837 |
| 41 | H | 3.7149 | 14.2794 | -3.9856 |
| 42 | H | 1.997  | 14.6187 | -4.1919 |
| 43 | C | 3.2144 | 13.4152 | -1.7405 |
| 44 | H | 4.1597 | 13.9564 | -1.8957 |
| 45 | C | 3.0073 | 12.9056 | -0.3758 |
| 46 | C | 3.9605 | 13.1762 | 0.6133  |
| 47 | H | 4.8249 | 13.7855 | 0.3691  |
| 48 | C | 3.8176 | 12.6707 | 1.9003  |
| 49 | H | 4.5644 | 12.9042 | 2.6502  |
| 50 | C | 2.7147 | 11.8743 | 2.2416  |
| 51 | C | 1.7491 | 11.6269 | 1.2493  |
| 52 | H | 0.9002 | 10.9935 | 1.4765  |
| 53 | C | 1.8908 | 12.1308 | -0.0331 |

|     |   |         |         |         |
|-----|---|---------|---------|---------|
| 54  | H | 1.1569  | 11.9077 | -0.7968 |
| 55  | C | 2.5861  | 11.2767 | 3.5918  |
| 56  | C | 3.7187  | 10.7982 | 4.2755  |
| 57  | H | 4.6922  | 10.8615 | 3.8046  |
| 58  | C | 3.6067  | 10.1958 | 5.5178  |
| 59  | H | 4.4815  | 9.8081  | 6.0237  |
| 60  | C | 2.3534  | 10.0449 | 6.1268  |
| 61  | C | 1.2224  | 10.5265 | 5.4565  |
| 62  | H | 0.2447  | 10.4265 | 5.9174  |
| 63  | C | 1.3358  | 11.1354 | 4.2118  |
| 64  | H | 0.4471  | 11.5169 | 3.7227  |
| 65  | C | 2.1996  | 9.3862  | 7.4332  |
| 66  | H | 1.1596  | 9.2278  | 7.7565  |
| 67  | C | 2.8836  | 8.3977  | 9.4328  |
| 68  | H | 1.8062  | 8.2199  | 9.563   |
| 69  | H | 3.1858  | 9.0974  | 10.2224 |
| 70  | C | 3.6994  | 7.12    | 9.6596  |
| 71  | H | 4.7501  | 7.3933  | 9.5588  |
| 72  | H | 3.5514  | 6.8011  | 10.7101 |
| 73  | C | 3.0584  | 10.6036 | -6.0007 |
| 74  | H | 3.8625  | 9.8721  | -6.0836 |
| 75  | H | 2.882   | 11.0014 | -7.0194 |
| 76  | C | 1.8017  | 9.8385  | -5.5707 |
| 77  | H | 0.928   | 10.5025 | -5.4991 |
| 78  | H | 1.5899  | 9.1253  | -6.3773 |
| 79  | C | 1.1357  | 9.1936  | -3.4308 |
| 80  | H | 0.2727  | 9.8671  | -3.5425 |
| 81  | C | 1.1915  | 8.4643  | -2.1542 |
| 82  | C | 2.2513  | 7.6053  | -1.8331 |
| 83  | H | 3.0532  | 7.4768  | -2.5487 |
| 84  | C | 2.2888  | 6.9586  | -0.6084 |
| 85  | H | 3.1386  | 6.3311  | -0.3684 |
| 86  | C | 1.2732  | 7.1442  | 0.3469  |
| 87  | C | 0.2035  | 7.9876  | 0.0116  |
| 88  | H | -0.6098 | 8.129   | 0.7139  |
| 89  | C | 0.165   | 8.6359  | -1.2175 |
| 90  | H | -0.6714 | 9.2857  | -1.4547 |
| 91  | C | 1.3571  | 6.5007  | 1.6799  |
| 92  | C | 1.8871  | 5.2114  | 1.8375  |
| 93  | H | 2.1931  | 4.6461  | 0.9649  |
| 94  | C | 2.0117  | 4.6409  | 3.0997  |
| 95  | H | 2.4277  | 3.6431  | 3.1983  |
| 96  | C | 1.6044  | 5.335   | 4.2455  |
| 97  | C | 1.0594  | 6.6173  | 4.0918  |
| 98  | H | 0.7617  | 7.1649  | 4.9766  |
| 99  | C | 0.9401  | 7.1871  | 2.835   |
| 100 | H | 0.5622  | 8.1984  | 2.7474  |

|     |   |        |         |         |
|-----|---|--------|---------|---------|
| 101 | C | 1.7734 | 4.7187  | 5.5716  |
| 102 | H | 2.3133 | 3.7597  | 5.5762  |
| 103 | C | 1.5584 | 4.5194  | 7.8878  |
| 104 | H | 2.1949 | 3.6342  | 7.7437  |
| 105 | H | 0.5862 | 4.1545  | 8.2428  |
| 106 | C | 2.1013 | 5.4336  | 8.9919  |
| 107 | H | 1.384  | 6.2459  | 9.1136  |
| 108 | H | 2.1011 | 4.8617  | 9.9408  |
| 109 | N | 3.4972 | 11.6682 | -5.0907 |
| 110 | N | 3.4187 | 6.0214  | 8.7295  |
| 111 | N | 6.1104 | 10.8592 | -3.6782 |
| 112 | N | 5.7621 | 5.6947  | 6.7802  |
| 113 | N | 2.3836 | 13.2512 | -2.6875 |
| 114 | N | 3.1798 | 9.0208  | 8.1537  |
| 115 | N | 2.0037 | 9.0745  | -4.3509 |
| 116 | N | 1.3354 | 5.2372  | 6.6451  |

- Lowest energy conformation for (pPh)<sub>2</sub>(BiPh)T<sub>2</sub>.

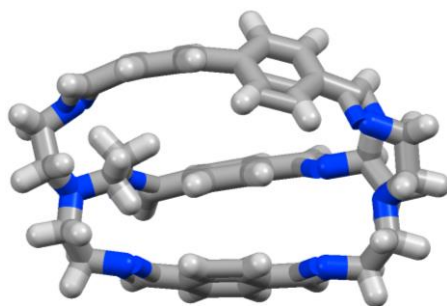

**Cartesian coordinates (96 atoms), E (298.15 K) = -2065.839945 Hartree**

|    |   |         |         |         |
|----|---|---------|---------|---------|
| 1  | N | -0.6391 | 5.624   | 0.848   |
| 2  | N | -0.5469 | 4.1048  | -1.8766 |
| 3  | C | -0.2098 | 4.2308  | 0.5978  |
| 4  | C | 0.4148  | 3.9867  | -0.7889 |
| 5  | C | -3.1295 | 5.1821  | 0.4885  |
| 6  | C | -2.0069 | 5.7197  | 1.3854  |
| 7  | C | 0.264   | 6.3699  | 1.732   |
| 8  | C | 1.6663  | 6.7363  | 1.1963  |
| 9  | N | 2.4872  | 5.5606  | 0.9722  |
| 10 | C | 3.1875  | 5.0942  | 1.9246  |
| 11 | C | 4.0783  | -0.507  | 1.512   |
| 12 | C | -3.8103 | 1.6317  | -0.4798 |
| 13 | C | -3.4889 | 0.829   | 0.6304  |
| 14 | C | -3.4613 | -0.5498 | 0.5191  |
| 15 | C | -3.7557 | -1.1719 | -0.7068 |
| 16 | C | -4.1208 | -0.3759 | -1.7978 |
| 17 | C | -4.149  | 1.0095  | -1.686  |
| 18 | C | -3.6792 | -2.6299 | -0.8886 |
| 19 | C | 0.1726  | -2.5501 | -2.9535 |
| 20 | C | 2.8632  | -4.5008 | 0.5617  |
| 21 | N | 1.902   | -5.088  | 1.1483  |

|    |   |         |         |         |
|----|---|---------|---------|---------|
| 22 | C | 1.4258  | -6.3472 | 0.6047  |
| 23 | C | -0.1003 | -6.4706 | 0.6643  |
| 24 | C | -2.3124 | -5.7322 | 0.3074  |
| 25 | C | -3.4089 | -4.8645 | -0.3136 |
| 26 | N | -3.3435 | -3.4491 | 0.0233  |
| 27 | C | 0.3621  | -4.7507 | -2.1795 |
| 28 | C | -0.7243 | -5.6574 | -1.5697 |
| 29 | N | 0.1197  | -3.3368 | -1.9575 |
| 30 | N | -0.9157 | -5.5328 | -0.122  |
| 31 | C | 3.1962  | -1.2062 | 2.3569  |
| 32 | C | 2.8452  | -2.5196 | 2.0946  |
| 33 | C | 3.3737  | -3.1867 | 0.9808  |
| 34 | C | 4.3264  | -2.5286 | 0.1938  |
| 35 | C | 4.6736  | -1.2078 | 0.4535  |
| 36 | C | 3.7793  | 3.7476  | 1.8184  |
| 37 | C | -0.4713 | 1.691   | -2.6524 |
| 38 | N | -3.2936 | 3.7338  | 0.5843  |
| 39 | C | -3.7033 | 3.1003  | -0.4383 |
| 40 | C | -0.3592 | 0.8997  | -1.4956 |
| 41 | C | -0.1417 | -0.4672 | -1.5851 |
| 42 | C | -0.0172 | -1.092  | -2.8346 |
| 43 | C | -0.1055 | -0.3059 | -3.9903 |
| 44 | C | -0.3478 | 1.0599  | -3.899  |
| 45 | C | 3.9857  | 2.9856  | 2.9746  |
| 46 | C | 4.1806  | 1.6096  | 2.8897  |
| 47 | C | 4.1972  | 0.9642  | 1.645   |
| 48 | C | 4.1408  | 1.7611  | 0.4869  |
| 49 | C | 3.9253  | 3.1255  | 0.5705  |
| 50 | C | -0.846  | 3.135   | -2.6452 |
| 51 | H | 0.5274  | 3.9192  | 1.3462  |
| 52 | H | -1.0664 | 3.5683  | 0.7199  |
| 53 | H | 0.934   | 3.0217  | -0.7669 |
| 54 | H | 1.1718  | 4.7557  | -0.9518 |
| 55 | H | -4.0586 | 5.6387  | 0.8523  |
| 56 | H | -2.9729 | 5.5122  | -0.5464 |
| 57 | H | -2.0981 | 5.2247  | 2.3696  |
| 58 | H | -2.2095 | 6.7822  | 1.5457  |
| 59 | H | -0.2231 | 7.3208  | 1.9659  |
| 60 | H | 0.4069  | 5.8409  | 2.6939  |
| 61 | H | 1.5594  | 7.2777  | 0.2526  |
| 62 | H | 2.1135  | 7.4167  | 1.9376  |
| 63 | H | 3.2753  | 5.6003  | 2.8986  |
| 64 | H | -3.238  | 1.3138  | 1.5657  |
| 65 | H | -3.1923 | -1.1706 | 1.3649  |
| 66 | H | -4.3608 | -0.8457 | -2.7459 |
| 67 | H | -4.4065 | 1.6165  | -2.5476 |
| 68 | H | -3.9425 | -2.9785 | -1.8992 |

|    |   |         |         |         |
|----|---|---------|---------|---------|
| 69 | H | 0.3619  | -2.9192 | -3.9746 |
| 70 | H | 3.3395  | -4.9235 | -0.3365 |
| 71 | H | 1.8053  | -7.1525 | 1.2471  |
| 72 | H | 1.8165  | -6.5462 | -0.4037 |
| 73 | H | -0.3843 | -6.3385 | 1.7113  |
| 74 | H | -0.3489 | -7.5162 | 0.3928  |
| 75 | H | -2.3384 | -5.5644 | 1.3873  |
| 76 | H | -2.6243 | -6.7831 | 0.1432  |
| 77 | H | -4.3434 | -5.2496 | 0.1154  |
| 78 | H | -3.4878 | -5.0191 | -1.3995 |
| 79 | H | 0.4357  | -4.9942 | -3.2529 |
| 80 | H | 1.3306  | -4.9838 | -1.7323 |
| 81 | H | -0.4903 | -6.6986 | -1.857  |
| 82 | H | -1.6596 | -5.4098 | -2.072  |
| 83 | H | 2.72    | -0.6841 | 3.1783  |
| 84 | H | 2.1108  | -3.0287 | 2.7059  |
| 85 | H | 4.7661  | -3.0418 | -0.6555 |
| 86 | H | 5.3868  | -0.7064 | -0.1904 |
| 87 | H | -3.9425 | 3.6139  | -1.3803 |
| 88 | H | -0.4946 | 1.3452  | -0.5195 |
| 89 | H | -0.086  | -1.0766 | -0.6921 |
| 90 | H | -0.0095 | -0.7724 | -4.9657 |
| 91 | H | -0.4521 | 1.648   | -4.805  |
| 92 | H | 3.9159  | 3.4575  | 3.9494  |
| 93 | H | 4.2748  | 1.0279  | 3.7994  |
| 94 | H | 4.1676  | 1.2879  | -0.4875 |
| 95 | H | 3.787   | 3.7142  | -0.3273 |
| 96 | H | -1.5136 | 3.3904  | -3.4758 |

- Lowest energy conformation for (pPh)(BiPh)<sub>2</sub>T<sub>2</sub>.

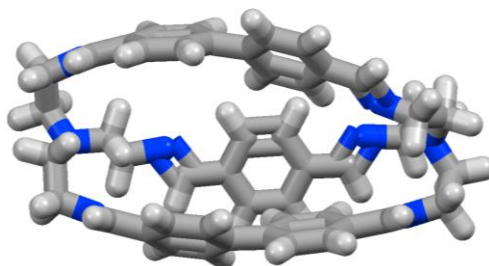

**Cartesian coordinates (106 atoms), E (298.15 K) = -2296.902849 Hartree**

|    |   |         |        |         |
|----|---|---------|--------|---------|
| 1  | N | 0.1438  | 6.3903 | 1.8387  |
| 2  | N | -2.8831 | 6.0572 | 1.2968  |
| 3  | C | -0.9653 | 7.1109 | 2.4634  |
| 4  | C | -2.266  | 7.3224 | 1.6387  |
| 5  | C | 0.6039  | 4.2597 | 3.0828  |
| 6  | C | 0.0029  | 4.9257 | 1.8322  |
| 7  | C | 0.6375  | 6.9898 | 0.6034  |
| 8  | C | 2.1633  | 6.8947 | 0.3764  |
| 9  | N | 2.613   | 5.5244 | 0.205   |
| 10 | C | 2.8088  | 5.0885 | -0.9737 |

|    |   |         |         |         |
|----|---|---------|---------|---------|
| 11 | C | 3.2412  | -0.5958 | -1.7629 |
| 12 | C | 1.0916  | 0.5461  | 3.0335  |
| 13 | C | -3.485  | 0.2818  | -1.5261 |
| 14 | C | -0.1513 | -0.0282 | 2.7108  |
| 15 | C | -0.283  | -1.3996 | 2.5752  |
| 16 | C | 0.8225  | -2.2483 | 2.7627  |
| 17 | C | 2.0544  | -1.679  | 3.106   |
| 18 | C | 2.1889  | -0.2991 | 3.2337  |
| 19 | C | -2.7578 | -0.5597 | -0.6637 |
| 20 | C | -2.4644 | -1.8644 | -1.0131 |
| 21 | C | -2.8999 | -2.388  | -2.2386 |
| 22 | C | -3.6623 | -1.5731 | -3.0837 |
| 23 | C | -3.9465 | -0.254  | -2.7362 |
| 24 | C | 0.7218  | -3.7133 | 2.6281  |
| 25 | C | -2.4932 | -3.7453 | -2.6458 |
| 26 | C | 2.5064  | -4.8197 | -2.0821 |
| 27 | N | 2.3719  | -5.563  | -1.0616 |
| 28 | C | 1.9045  | -6.9266 | -1.2324 |
| 29 | C | 0.8736  | -7.2793 | -0.1493 |
| 30 | C | -1.0331 | -6.4527 | 1.1337  |
| 31 | C | -0.3171 | -5.7792 | 2.3108  |
| 32 | N | -0.3359 | -4.3224 | 2.2735  |
| 33 | C | -1.2417 | -5.7244 | -2.4072 |
| 34 | C | -1.2348 | -6.7612 | -1.2729 |
| 35 | N | -1.6877 | -4.4292 | -1.9421 |
| 36 | N | -0.3301 | -6.448  | -0.156  |
| 37 | C | 3.4168  | -1.2611 | -2.986  |
| 38 | C | 3.207   | -2.6336 | -3.089  |
| 39 | C | 2.8384  | -3.3885 | -1.9689 |
| 40 | C | 2.6978  | -2.7335 | -0.7385 |
| 41 | C | 2.8894  | -1.3677 | -0.6403 |
| 42 | C | 3.1189  | 3.6717  | -1.2315 |
| 43 | C | -3.4373 | 4.4107  | -0.3621 |
| 44 | N | 0.3112  | 2.8341  | 3.0438  |
| 45 | C | 1.2714  | 2.0078  | 3.1347  |
| 46 | C | -3.739  | 3.4093  | 0.5736  |
| 47 | C | -3.8404 | 2.0868  | 0.1793  |
| 48 | C | -3.6375 | 1.7101  | -1.1615 |
| 49 | C | -3.4416 | 2.7252  | -2.1082 |
| 50 | C | -3.3429 | 4.0559  | -1.7133 |
| 51 | C | 2.8484  | 3.1074  | -2.4834 |
| 52 | C | 2.9346  | 1.732   | -2.6772 |
| 53 | C | 3.3198  | 0.879   | -1.6324 |
| 54 | C | 3.6901  | 1.469   | -0.4089 |
| 55 | C | 3.5795  | 2.8332  | -0.2065 |
| 56 | C | -3.0479 | 5.7619  | 0.0706  |
| 57 | H | -1.2308 | 6.583   | 3.3832  |

|     |   |         |         |         |
|-----|---|---------|---------|---------|
| 58  | H | -0.612  | 8.1052  | 2.7604  |
| 59  | H | -2.0635 | 7.94    | 0.7495  |
| 60  | H | -2.9514 | 7.8848  | 2.2844  |
| 61  | H | 1.6806  | 4.4728  | 3.1427  |
| 62  | H | 0.1236  | 4.678   | 3.9755  |
| 63  | H | 0.519   | 4.5267  | 0.9602  |
| 64  | H | -1.0449 | 4.6225  | 1.7613  |
| 65  | H | 0.4036  | 8.0582  | 0.6342  |
| 66  | H | 0.1394  | 6.5839  | -0.2928 |
| 67  | H | 2.6691  | 7.3192  | 1.2482  |
| 68  | H | 2.4001  | 7.5154  | -0.5029 |
| 69  | H | 2.6902  | 5.7311  | -1.86   |
| 70  | H | -0.9987 | 0.6291  | 2.5605  |
| 71  | H | -1.2383 | -1.8425 | 2.3218  |
| 72  | H | 2.9146  | -2.3211 | 3.2645  |
| 73  | H | 3.1538  | 0.1271  | 3.4888  |
| 74  | H | -2.3679 | -0.1595 | 0.264   |
| 75  | H | -1.8623 | -2.4924 | -0.3689 |
| 76  | H | -4.0192 | -1.9662 | -4.0306 |
| 77  | H | -4.5289 | 0.3631  | -3.4111 |
| 78  | H | 1.6412  | -4.2632 | 2.8806  |
| 79  | H | -2.8958 | -4.1103 | -3.6041 |
| 80  | H | 2.3361  | -5.1933 | -3.1036 |
| 81  | H | 1.5083  | -7.1111 | -2.2426 |
| 82  | H | 2.7544  | -7.6066 | -1.0924 |
| 83  | H | 1.3746  | -7.1513 | 0.8108  |
| 84  | H | 0.6261  | -8.354  | -0.244  |
| 85  | H | -1.9796 | -5.9279 | 0.9952  |
| 86  | H | -1.2779 | -7.485  | 1.4513  |
| 87  | H | 0.7009  | -6.1707 | 2.4466  |
| 88  | H | -0.8838 | -6.0713 | 3.2046  |
| 89  | H | -0.2195 | -5.6027 | -2.7795 |
| 90  | H | -1.8546 | -6.1084 | -3.2402 |
| 91  | H | -2.2585 | -6.8535 | -0.8975 |
| 92  | H | -0.983  | -7.7388 | -1.7103 |
| 93  | H | 3.7126  | -0.7032 | -3.8669 |
| 94  | H | 3.3234  | -3.1215 | -4.0516 |
| 95  | H | 2.3793  | -3.3103 | 0.1198  |
| 96  | H | 2.7015  | -0.8821 | 0.3085  |
| 97  | H | 2.3093  | 2.3436  | 3.2801  |
| 98  | H | -3.8414 | 3.6825  | 1.6163  |
| 99  | H | -4.0458 | 1.3248  | 0.9219  |
| 100 | H | -3.2845 | 2.4652  | -3.1486 |
| 101 | H | -3.1232 | 4.8187  | -2.4535 |
| 102 | H | 2.5064  | 3.7413  | -3.2952 |
| 103 | H | 2.6391  | 1.3143  | -3.6323 |
| 104 | H | 4.0483  | 0.8435  | 0.3995  |

|     |   |         |        |         |
|-----|---|---------|--------|---------|
| 105 | H | 3.824   | 3.2692 | 0.754   |
| 106 | H | -2.8034 | 6.4722 | -0.7338 |
